# Supplementary material for: Optical signaling in biofluids: a nondenaturing photostable molecular probe for serum albumins
Source: Royal Society of Chemistry journal article supplement (doi:10.1039/c5cc08479b), 2015-11-24
Supplement: c5cc08479b1.pdf [file c5cc08479b1.pdf]

## Electronic Supplementary Information (ESI)

### On optical signaling in biofluids: nondenaturing photostable molecular probe for serum albumins

Gourab Dey, Pankaj Gaur, Rajanish Giri\* and Subrata Ghosh\*

School of Basic Sciences, Indian Institute of Technology Mandi, Mandi, Himachal Pradesh – 175001, India.

#### Reagents and Instruments

All solvents were purchased from Fischer Scientific and distilled before use. The biomolecules including proteins, enzymes and nucleic acids were purchased from Sigma Aldrich. Photophysical property studies were done in spectroscopic grade solvents. Doubly ionized water used in all experiments was from Milli-Q system. Phosphate buffer saline (pH = 7.4, 100 mM) was prepared using doubly ionized water. Proteins, enzymes and nucleic acid solutions were prepared in phosphate buffer saline (PBS). Stock solutions of 5 mM of each probe were prepared in DMSO and the aliquots of biomolecule stock solutions (5  $\mu$ M) were incubated with 3  $\mu$ L (5  $\mu$ M) solution of each probe for absorption and emission titration experiments.  $^1\text{H}$  and  $^{13}\text{C}$  NMR were recorded on 500 MHz Jeol ECS-400 (or 125 MHz for  $^{13}\text{C}$ ) spectrometer in  $\text{CDCl}_3$  and  $\text{CD}_3\text{OD}$ . Micro Mass ESI-TOF MS spectrometer was used for recording high resolution mass spectra of compounds. Shimadzu UV-2450 and Cary Eclipse spectrophotometers were used for recording the absorption and fluorescence spectra respectively. All spectral data were recorded at 25 °C. Fluorescence measurements were done using 3 cm quartz cell with 5 nm slit width for both excitation and emission experiments (except for undiluted urine experiment), and the excitation wavelength was 304 nm ( $\lambda_{\text{ex}}=304$  nm). Experiments using pure urine samples were done in Horiba Fluorolog 3 using 3 nm slit and 5 nm width. Steady state anisotropy measurements were done using Horiba Fluorolog 3 spectrofluorimeter (Horiba Scientific, USA).

All time resolved fluorescence measurements were done on time correlated single photon counting (TCSPC) spectrometer (Horiba DeltaFlex, U.K.). Jasco – J1500 machine was used for Circular Dichroism spectra measurement. Stuart SMP 30 melting point apparatus was used to record melting point of the compounds. The melting point of all the compounds was recorded in open glass capillary and the values are reported directly.

### **Protein sensing studies**

The amount of DMSO did not exceed 0.1 % in the case of protein sensing studies. In the case of protein quenching it did not exceed 1.2 % . This amount cannot create any type of structural change in biomolecules.

### **Photostability studies**

Output (488 nm, 140 mW) of an optical parametric amplifier (TOPAS, Light Conversion) pumped by a Ti:sapphire ultrafast regenerative amplifier (Splitfire Ace, Spectra Physics) was used for analyzing photostability of probe molecule.

**Calculation of quantum yield ( $\Phi$ ):** 2-amino pyridine in 0.1 N H<sub>2</sub>SO<sub>4</sub> was used as standard for determining the quantum yield.<sup>1</sup> The following equation was used for calculating the quantum yield,<sup>2</sup>

$$\Phi = \frac{A_s F_u n_u^2}{A_u F_s n_s^2} \times \Phi_s$$

A<sub>s</sub>= the absorbance value of standard.

A<sub>u</sub>= the absorbance value of unknown sample.

F<sub>s</sub> = the fluorescence peak of standard.

F<sub>u</sub> = the fluorescence peak of unknown sample.

n<sub>s</sub> = the refractive index of the solvent used for standard.

N<sub>u</sub> = the refractive index of the solvent used for standard.

$\Phi_s$  = the quantum yield of standard.

$\Phi_u$  = the quantum yield of unknown sample.

**Calculation of lifetime and mean lifetime ( $\tau_m$ ):** The curve which was generated due to intensity decay was fitted in the equation below to calculate the lifetime values.<sup>1</sup>

$$I(t) = \sum_i \alpha_i \exp\left(\frac{-t}{\tau_i}\right)$$

Here, the initial intensity of component  $i$  is  $\alpha_i$  with lifetime  $\tau$ . The equation which was used for determining the mean lifetime ( $\tau_m$ ) of compounds in different experimental conditions is,<sup>3</sup>

$$\tau_m = \frac{\sum_i \alpha_i \tau_i}{\sum_i \alpha_i}$$

**Steady state anisotropy( $r$ ) calculation:**

$$r = \frac{I_{VV} - GI_{VH}}{I_{VV} + 2GI_{VH}}$$

$I_{VV}$  = the intensity obtained when the excitation polarizer orientated vertically and emission polarizer orientated vertically.

$I_{VH}$  = the intensity obtained when the excitation polarizer orientated vertically and emission polarizer orientated horizontally.

The  $G$  factor is defined as,<sup>1</sup>

$$G = \frac{I_{HV}}{I_{HH}}$$

**Non-radiative decay rate constant calculation ( $k_{nr}$ ):** The following equation was used to calculate the non-radiative decay rate constant ( $k_{nr}$ ).<sup>4</sup>

$$k_{nr} = k_r \left[ \frac{1}{\Phi} - 1 \right]$$

Here  $k_r$  represents the radiative decay constant and  $\Phi$  represents the quantum yield of the compound.  $k_r$  can be determined through the following equation,

$$K_r = \frac{\Phi_f}{\tau_f}$$

Here  $\tau_f$  is the lifetime of compounds and  $\Phi_f$  is the quantum yield of the compounds.

**Calculation of change in free energy ( $\Delta G$ ):** The complexation between the probes and the proteins associated with the change in free energy which was calculated by using the following equation,<sup>5</sup>

$$\Delta G = -2.303RT \log K_a$$

**Scheme S1: Synthetic routes for the probes**

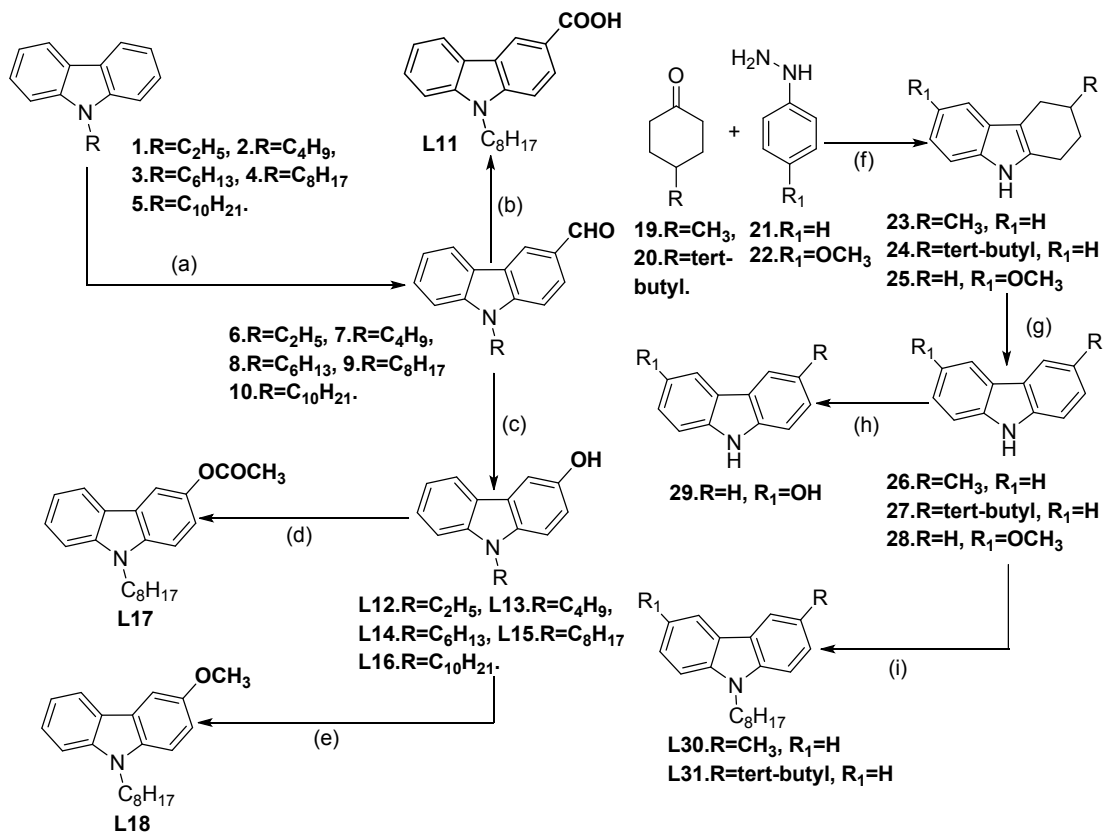

- a) POCl<sub>3</sub>, DMF, 0 °C to 105 °C , 30 mins in MW, (b) KMnO<sub>4</sub>, acetone, 80 °C, 5h, c) H<sub>2</sub>O<sub>2</sub>, MeOH, H<sub>2</sub>SO<sub>4</sub>, 2 h, rt, d) Acetic anhydride, dry DCM, triethyl amine, 12 h, rt, e) Methyl iodide, NaOH, 80 °C, 8 h, f) Glacial acetic acid, reflux, 3h, g) Palladium charcoal (10 %), 290 °C, 45 min, h) HBr, glacial acetic acid, reflux, 3 h, i) KOH, 1 Bromooctane, rt, 12 h.

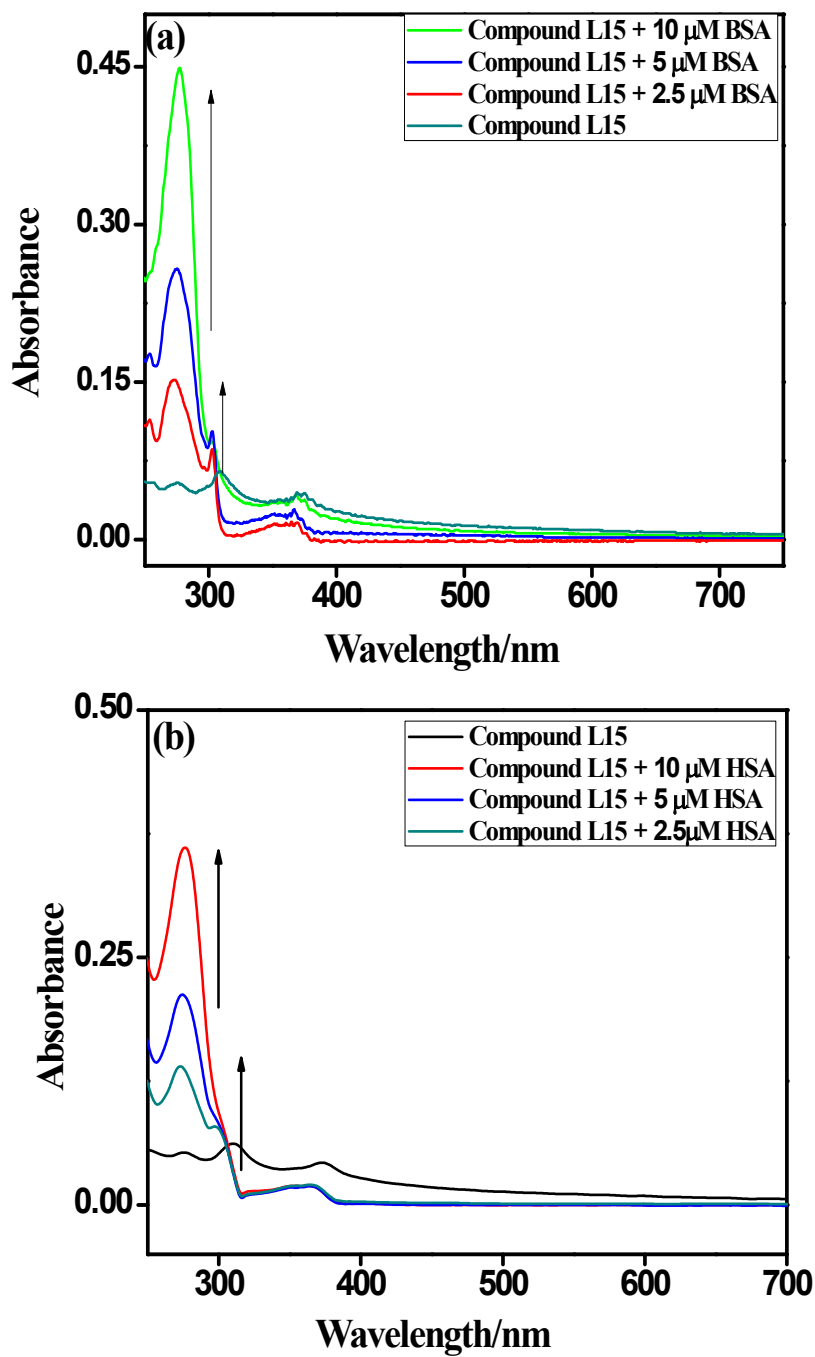

**Fig. S1** UV-vis spectra of L15 (5  $\mu\text{M}$ ) in the presence of increasing amount of a) BSA, b) HSA (0 to 5  $\mu\text{M}$ ) in PBS buffer (pH = 7.4).

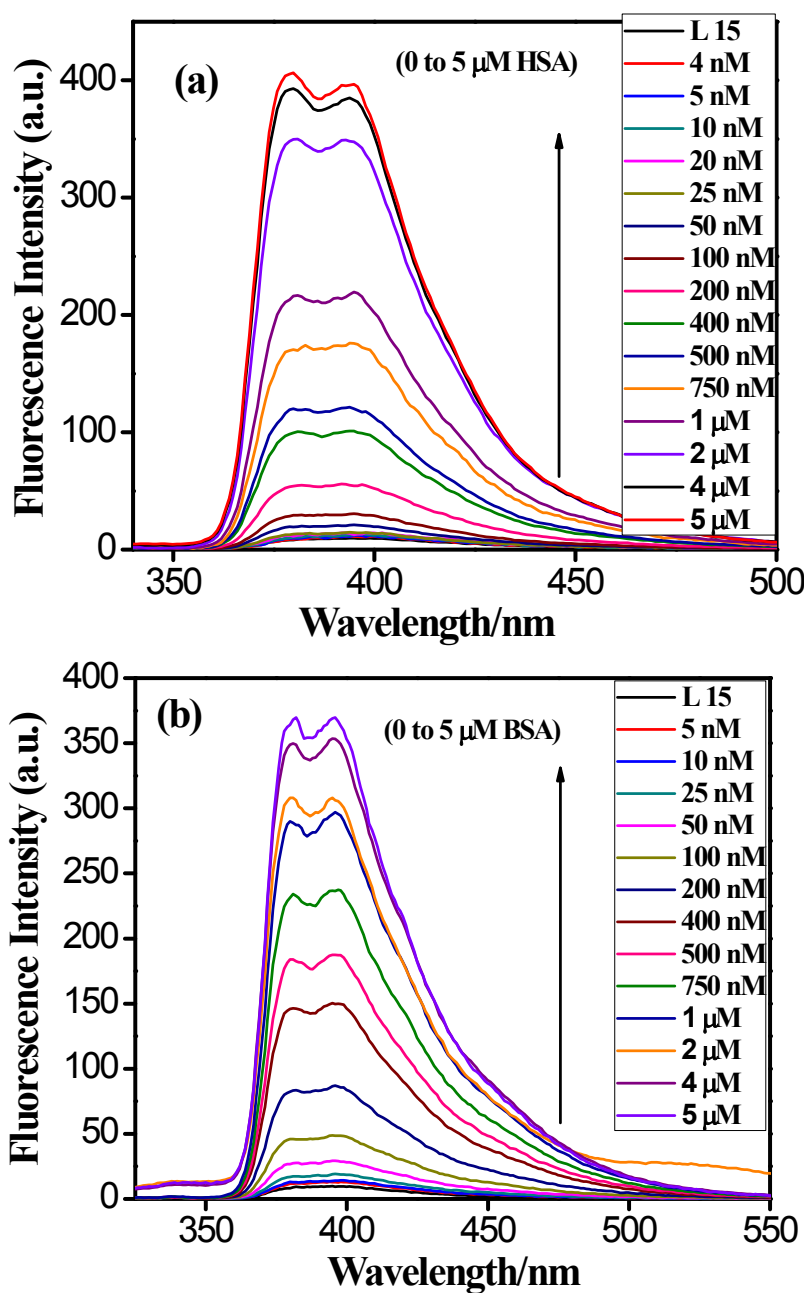

**Fig. S2** Fluorescence response of L15 (5  $\mu\text{M}$ ) in the presence of increasing amount of a) HSA (0 to 5  $\mu\text{M}$ ), b) BSA (0 to 5  $\mu\text{M}$ ).

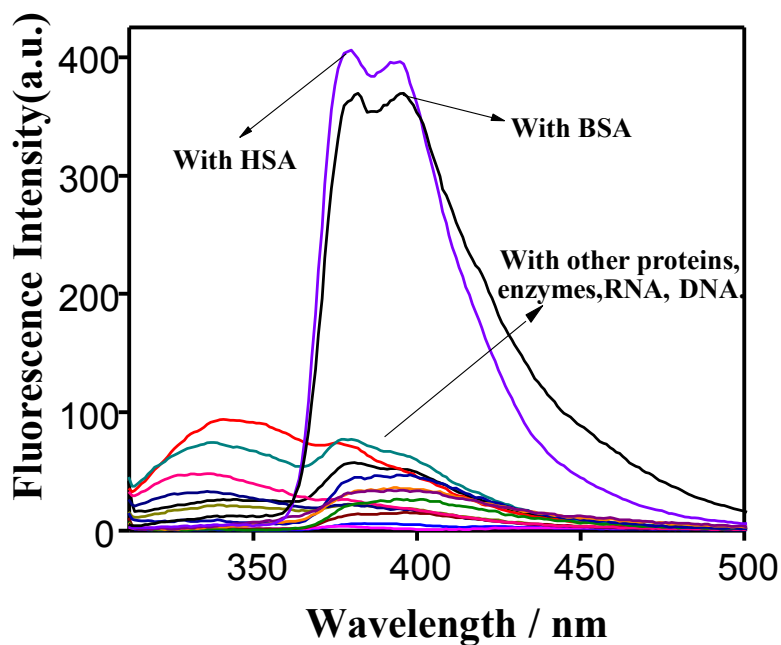

**Fig. S3** Fluorescence response of **L15** (5  $\mu\text{M}$ ) in the presence of different types of proteins (5  $\mu\text{M}$ ), enzymes (5  $\mu\text{M}$ ), nucleic acids (3 mg/mL) in PBS buffer (pH = 7.4).

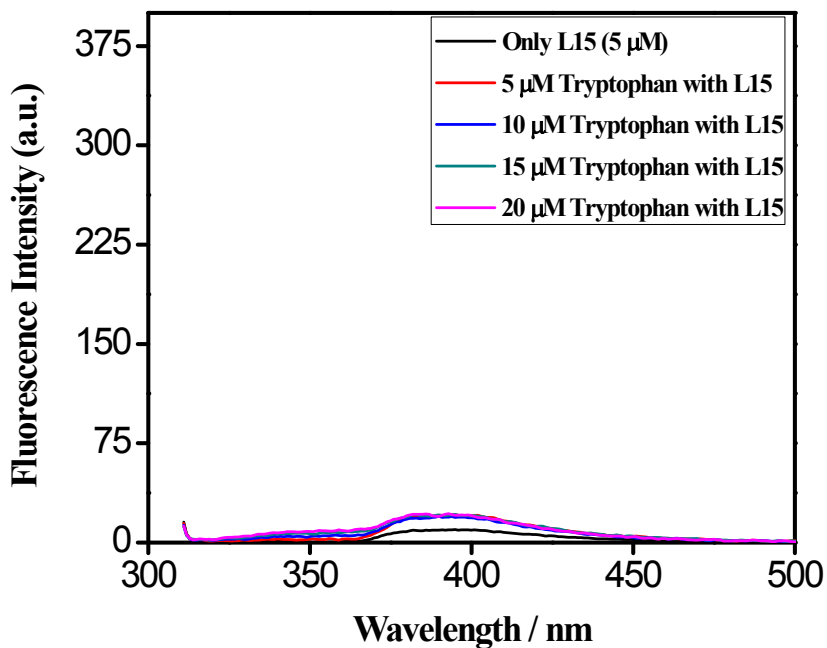

**Fig. S4** Fluorescence response of **L15** (5  $\mu\text{M}$ ) in the presence of tryptophan amino acid (0 to 20  $\mu\text{M}$ ) in PBS buffer (pH = 7.4).



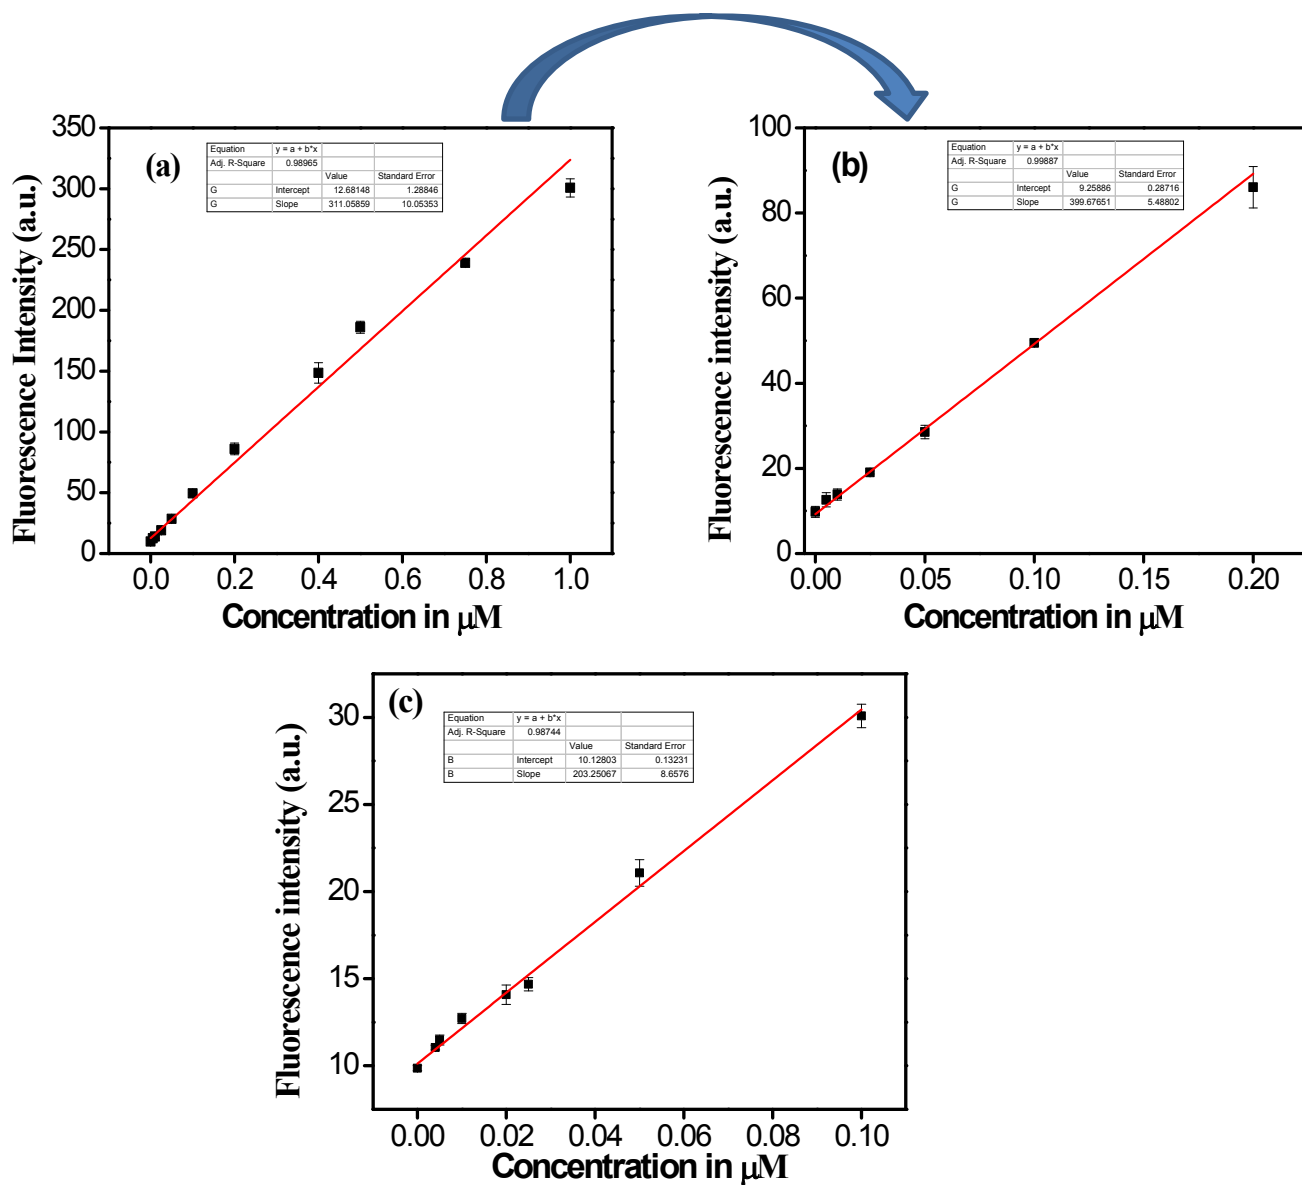

**Fig. S5** a) Fluorescence intensity of **L15** (5 μM) increased linearly with the BSA concentration (0–1 μM), b) fluorescence response of **L15** (5 μM) in lower concentration of BSA (0-0.02 μM). c) fluorescence response of **L15** (5 μM) in lower concentration of HSA (0-0.01 μM).

**Table S1** Analytical parameters obtained for BSA/HSA using **L15**

| Compound   | Protein | Linear Range | Correlation Coefficient |
|------------|---------|--------------|-------------------------|
| <b>L15</b> | BSA     | 0.00 – 1 μM  | 0.989                   |
| <b>L15</b> | HSA     | 0.00 – 1 μM  | 0.99                    |

**Table S2** Detection limit calculation of **L15** for HSA and BSA

| Entry | Probe      | Protein | Concentration        | % Fluorescence intensity change | S/N | Detection limit (M) |
|-------|------------|---------|----------------------|---------------------------------|-----|---------------------|
| 1     | <b>L15</b> | BSA     | $5 \times 10^{-9}$ M | 30.26                           | 3   | $5 \times 10^{-9}$  |
| 2     | <b>L15</b> | HSA     | $4 \times 10^{-9}$ M | 14.87                           | 3   | $4 \times 10^{-9}$  |

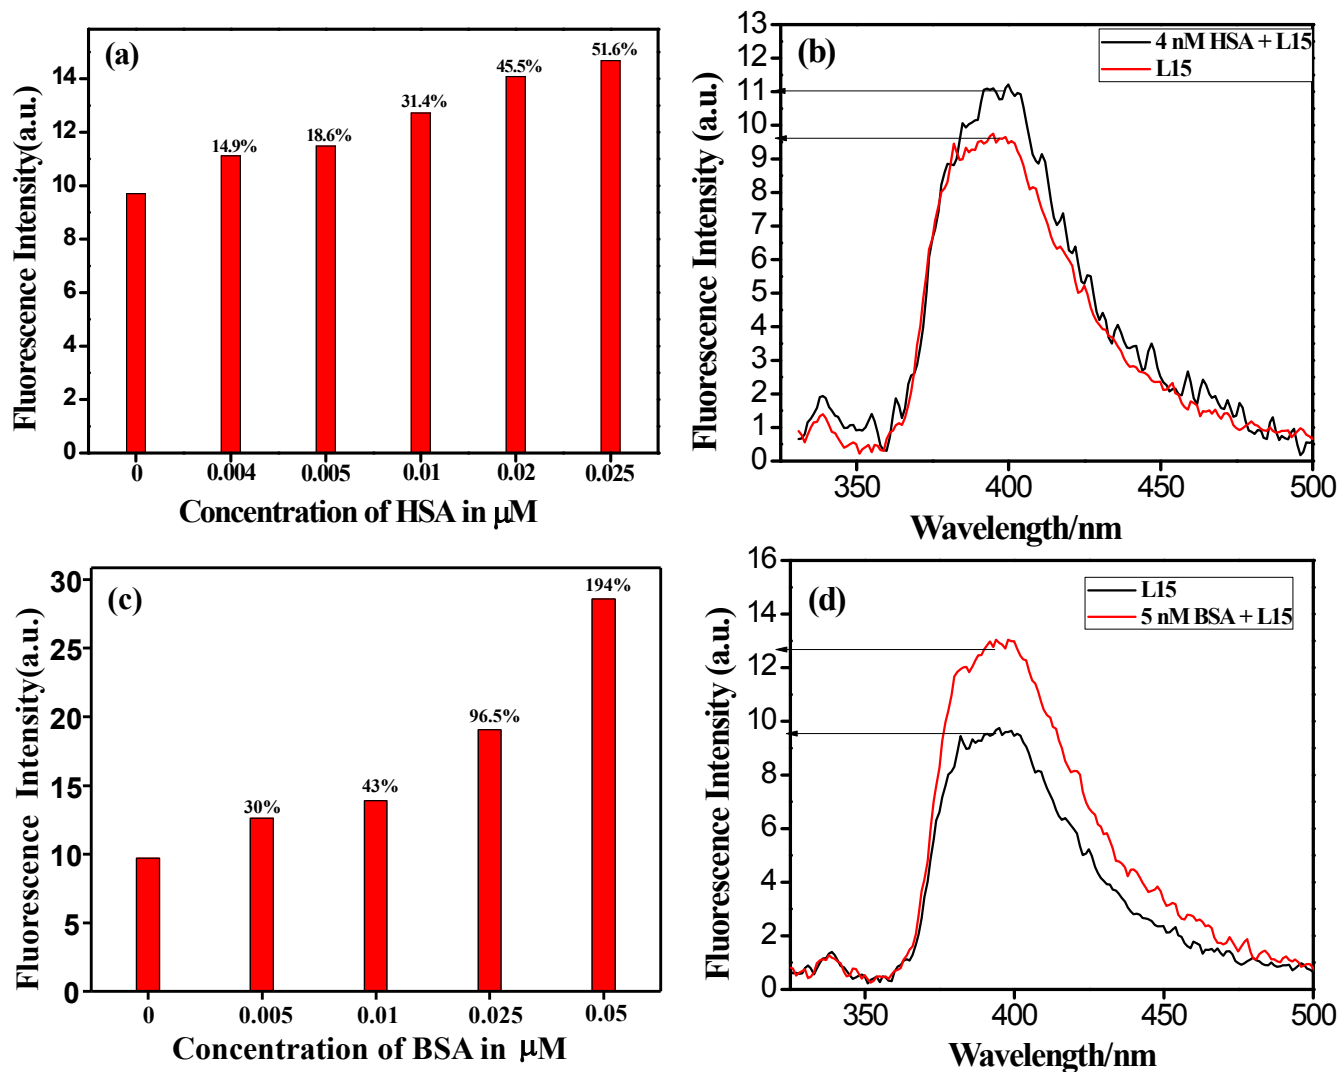

**Fig. S6** a) Bar graph of percentage increment of fluorescent signal of **L15** (5 μM) in the presence of different amount of HSA, b) fluorescence intensity of **L15** (5 μM) in the presence of 4 nM HSA, c) bar graph of percentage increment of fluorescent signal of **L15** (5 μM) in the presence of different amount of **BSA**, d) fluorescence intensity of **L15** (5 μM) in the presence of 5 nM BSA.

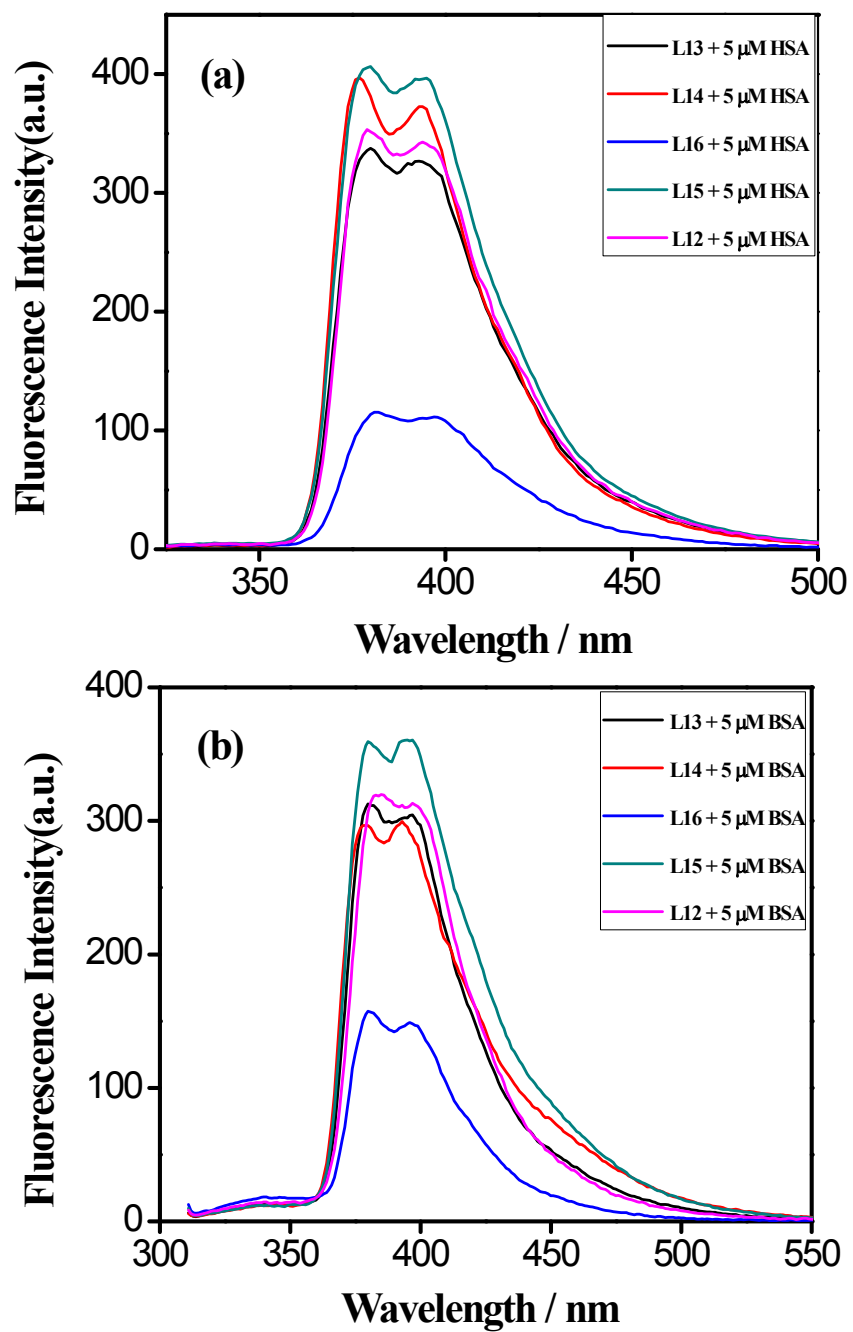

**Fig. S7** Fluorescence response of L12-16 (5 μM) in the presence of 5 μM a) HSA, b) BSA in PBS buffer (pH = 7.4),  $\lambda_{\text{exc}} = 304\text{nm}$ .

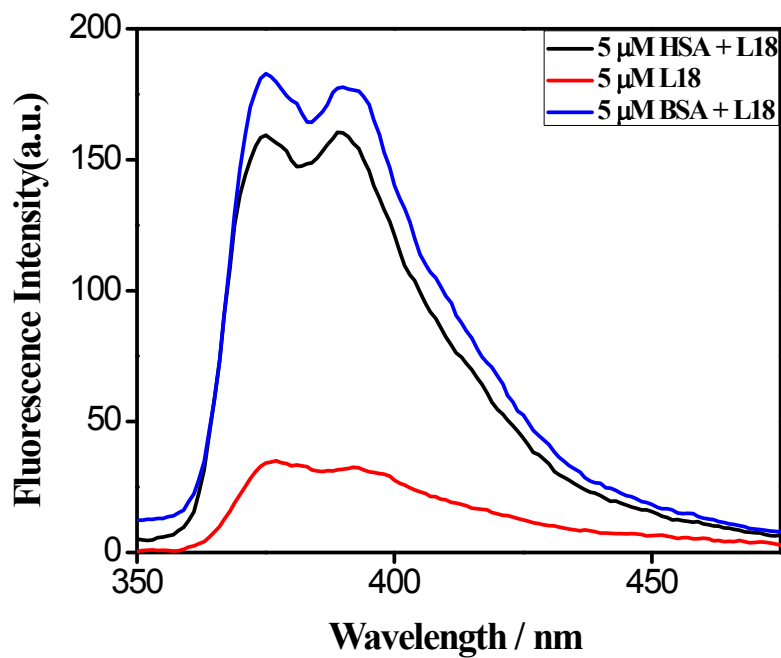

**Fig. S8** Fluorescence response of **L18** (5 $\mu$ M) in the presence of 5  $\mu$ M HSA, BSA in PBS buffer (pH = 7.4),  $\lambda_{exc}$  = 304nm.

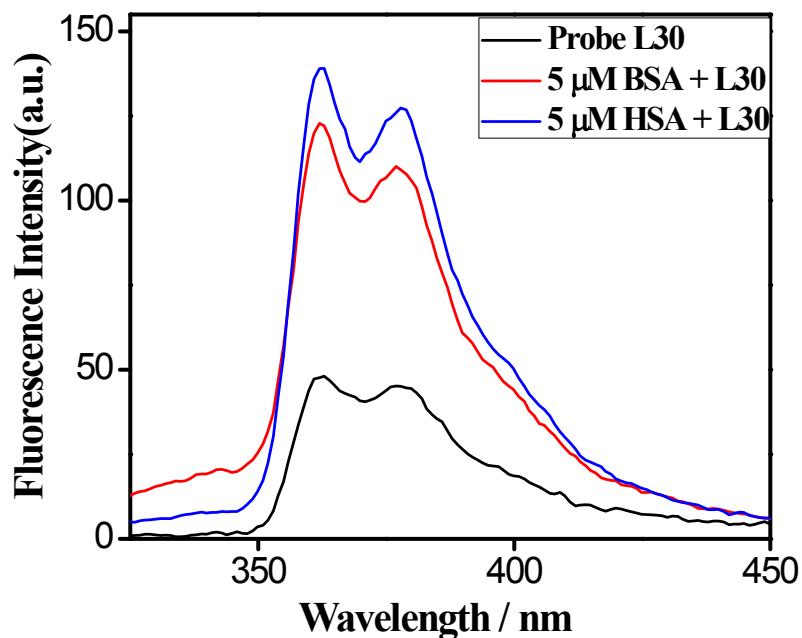

**Fig. S9** Fluorescence response of probe **L30** (5 $\mu$ M) in the presence of 5  $\mu$ M HSA, BSA in PBS buffer (pH = 7.4),  $\lambda_{exc}$  = 304nm.

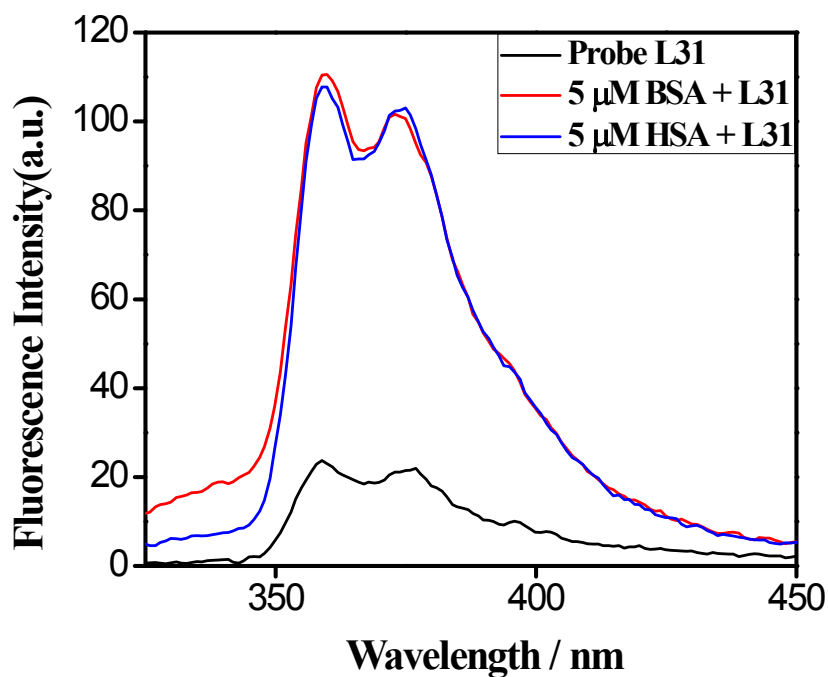

**Fig. S10** Fluorescence response of **L31** (5μM) in the presence of 5 μM HSA, BSA in PBS buffer (pH = 7.4),  $\lambda_{exc} = 304\text{nm}$ .

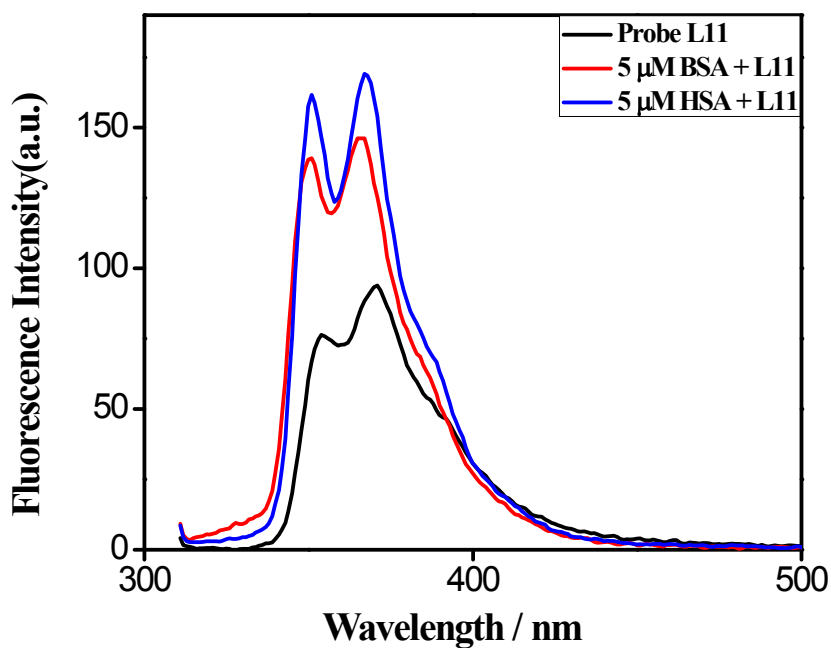

**Fig. S11** Fluorescence response of **L11** (5μM) in the presence of 5 μM HSA, BSA in PBS buffer (pH = 7.4),  $\lambda_{exc} = 304\text{nm}$ .

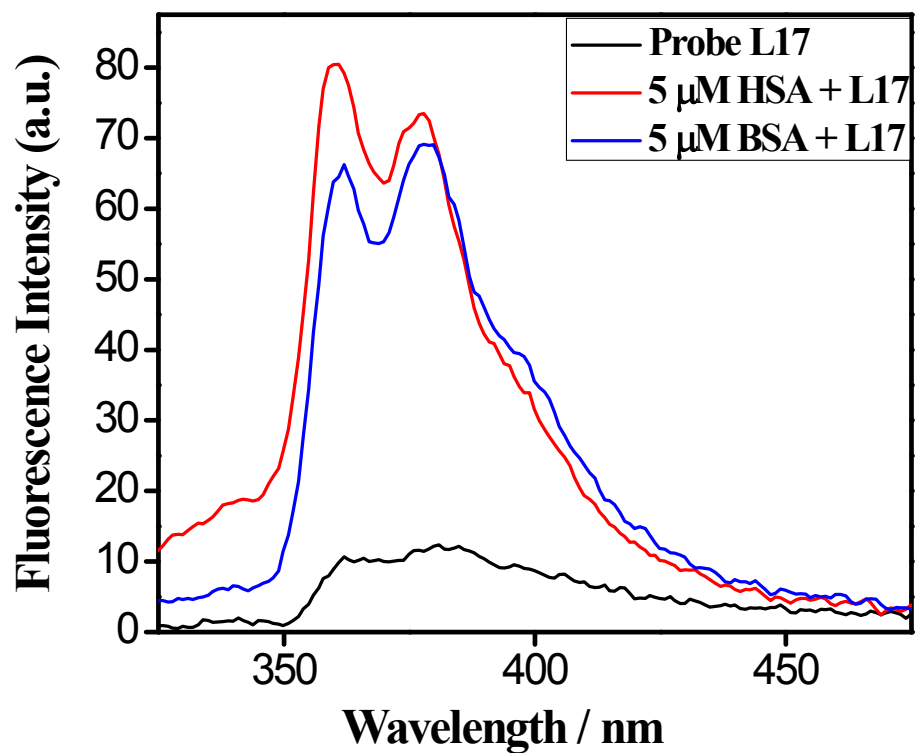

**Fig. S12** Fluorescence response of L17 (5μM) in the presence of 5 μM HSA, BSA in PBS buffer (pH = 7.4),  $\lambda_{exc} = 304\text{nm}$ .

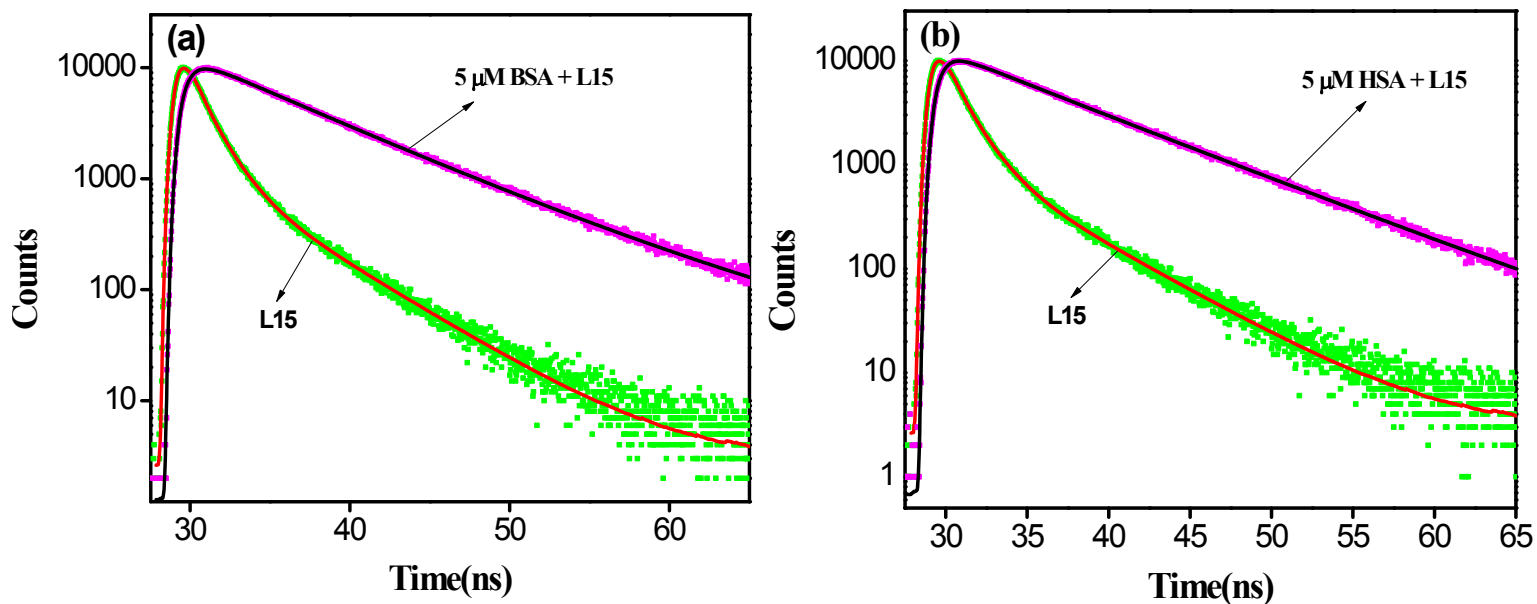

**Fig. S13** Time resolved fluorescence spectra of **L15** with a) BSA and b) HSA (5  $\mu\text{M}$ ) respectively.

**Table S3** Lifetime data of **L15** in the presence of HSA and BSA

| Serial No | Sample              | $\lambda_{\text{max}}$ | $\tau_1$ | $\tau_2$ | $\tau_3$ | $\alpha_1$ | $\alpha_2$ | $\alpha_3$ | $\tau_m$ | $\chi^2$ |
|-----------|---------------------|------------------------|----------|----------|----------|------------|------------|------------|----------|----------|
| 1         | <b>L15</b>          | 395                    | 1.3175   | .3885    | 4.9282   | .0179      | .0498      | .00287     | .8097    | 1.07     |
| 2         | <b>L15 with BSA</b> | 395                    | 6.61     | 13.446   | -        | .02432     | .00197     | -          | 7.122    | 1.11     |
| 3         | <b>L15 with HSA</b> | 395                    | 6.436    | 8.636    | -        | .01944     | .007145    | -          | 7.03     | 0.99     |

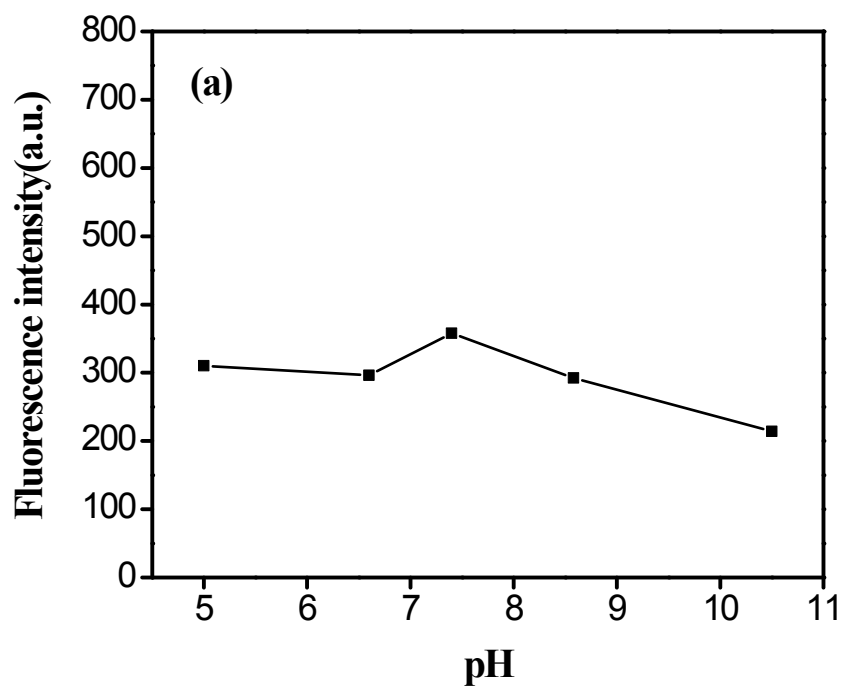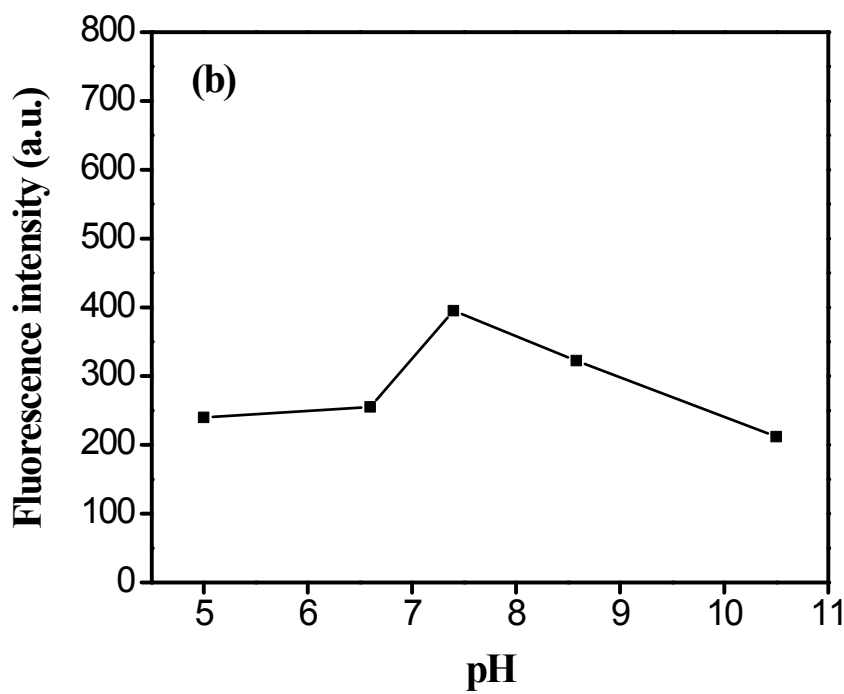

**Fig. S14** The effect of pH on the interaction of **L15** with (a) BSA, (b) HSA. Here the concentration of serum albumins and **L15** are 5  $\mu$ M.



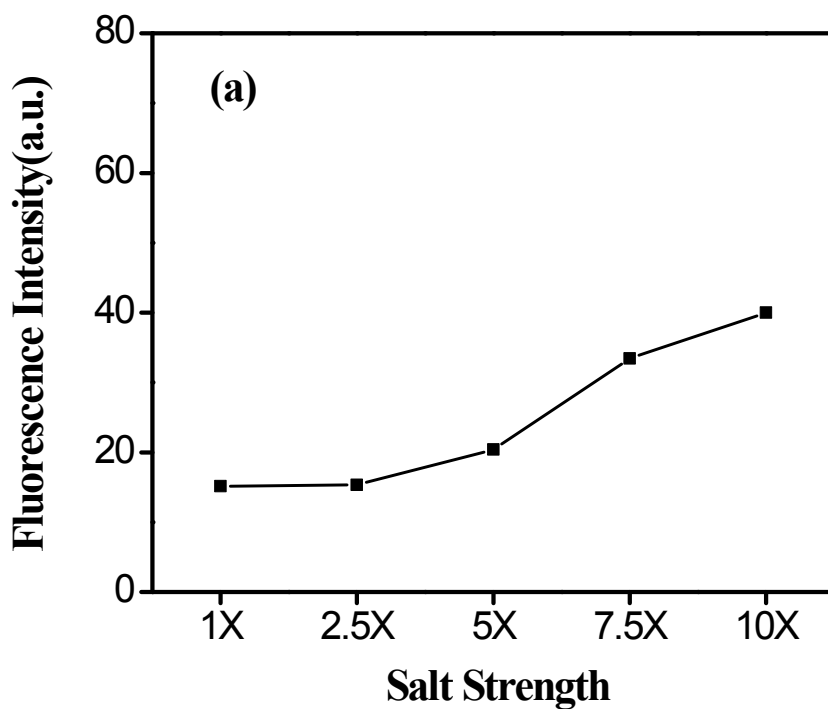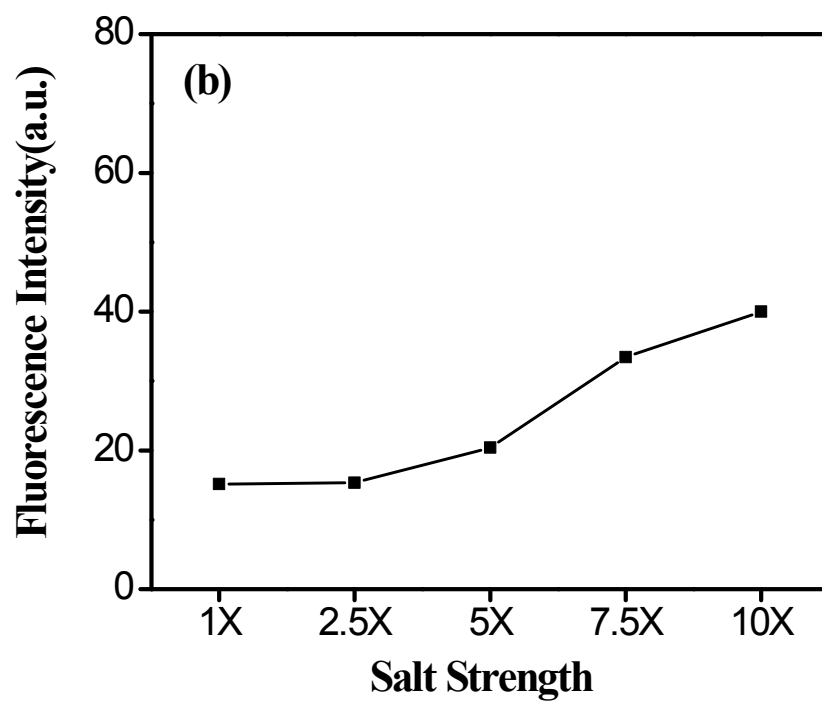

**Fig. S15** The effect of salt strength on the interaction of **L15** with (a) BSA, (b) HSA. Here the concentrations of serum albumins and **L15** are 5  $\mu$ M.

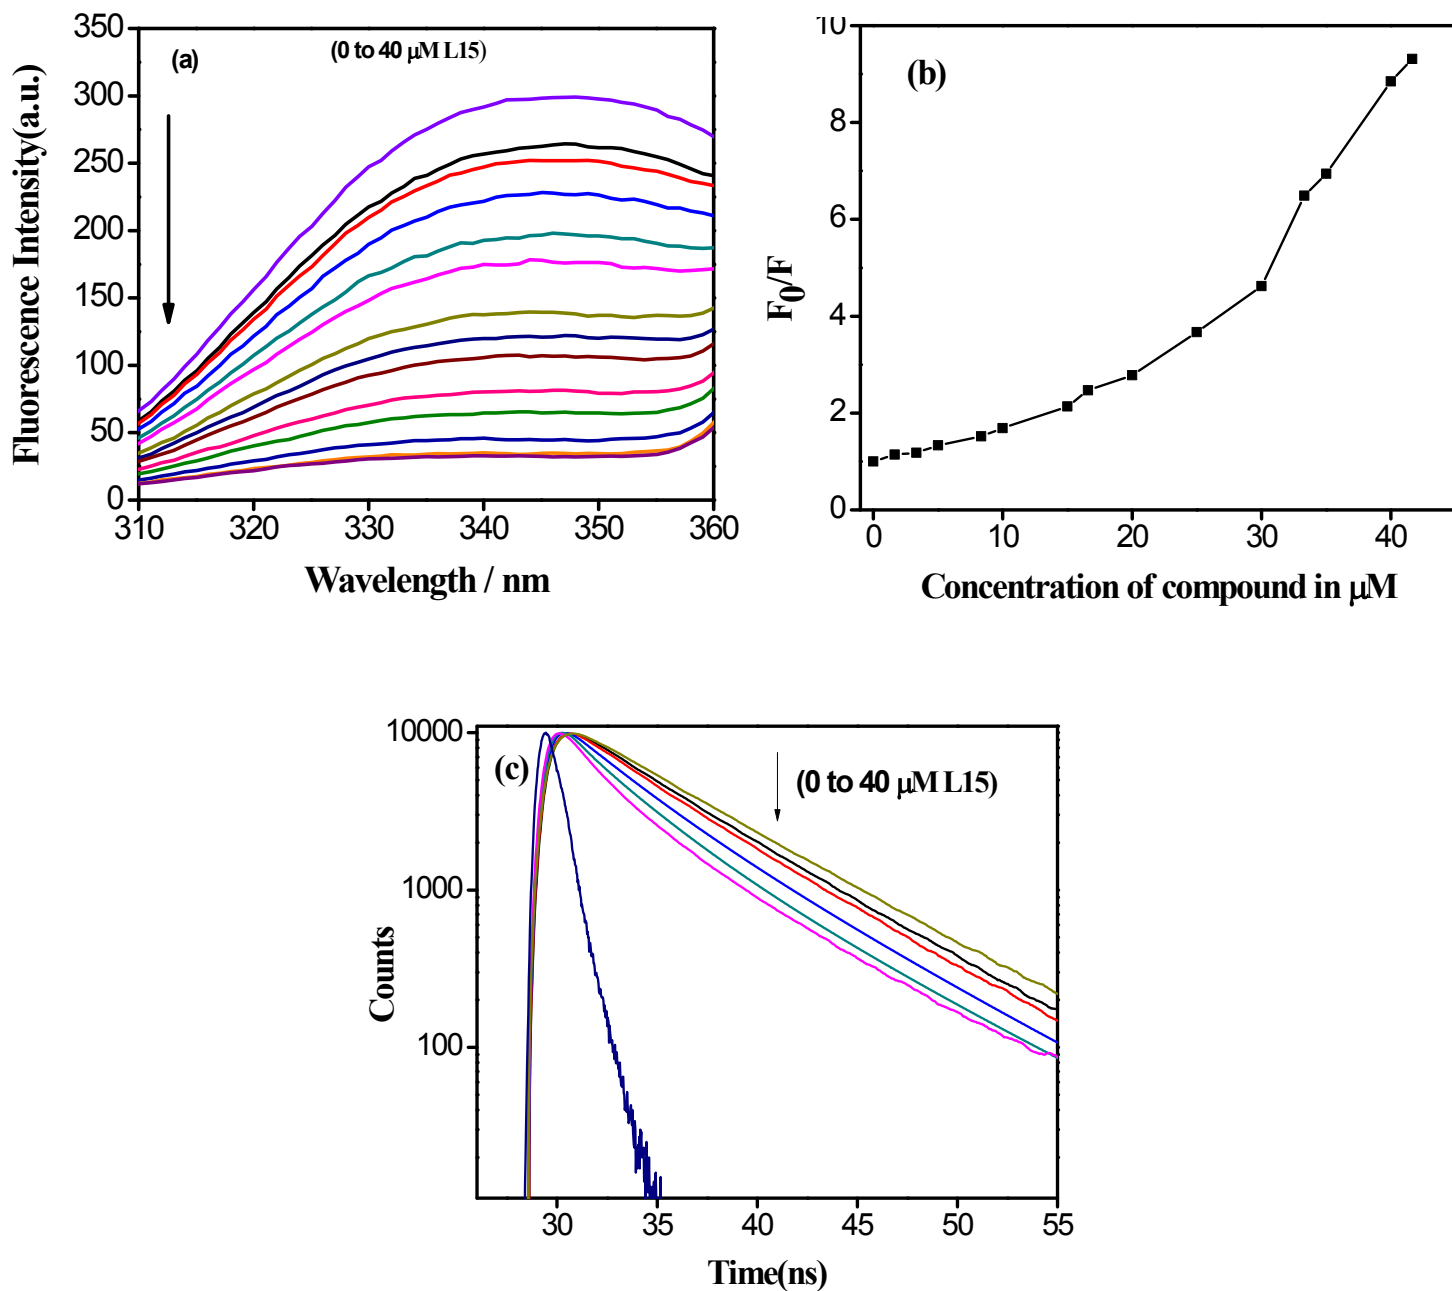

**Fig. S16** a) Fluorescence quenching of BSA (10  $\mu\text{M}$ ) by L15 (0 to 40  $\mu\text{M}$ ), b) Stern – Volmer plot of probe – protein complexes. c) Time resolved fluorescence quenching decays of BSA (10  $\mu\text{M}$ ) in the presence of L15 (0 to 40  $\mu\text{M}$ ).

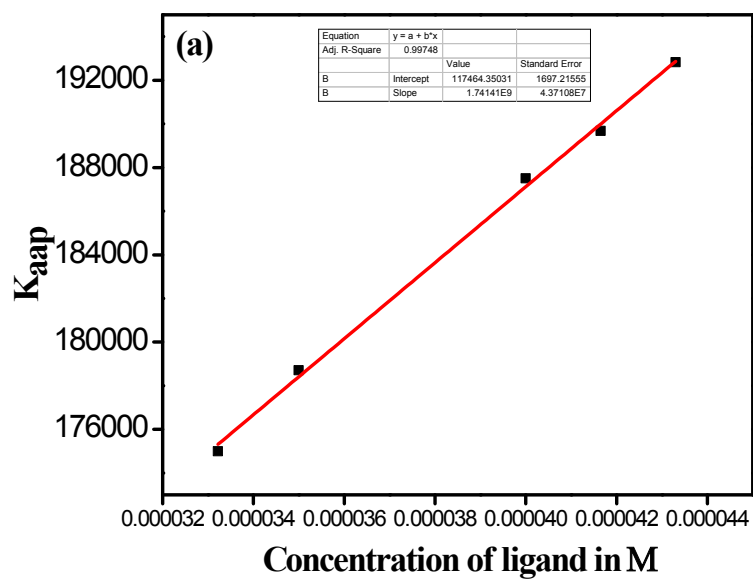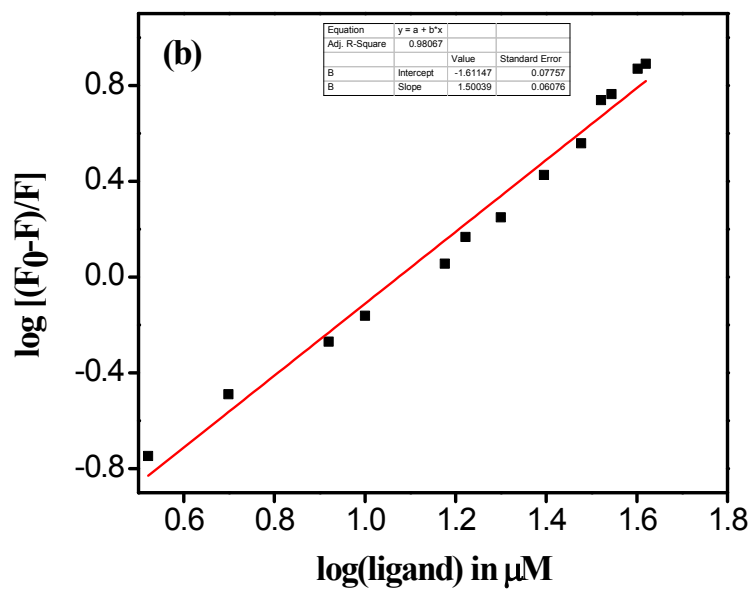

**Fig. S17** a) Plot of  $K_{app}$  Vs the concentration of probe, b) Plot of  $\log [(F_0-F)/F]$  Vs  $\log$  [probe] for probe – protein (BSA) composites in PBS at pH = 7.4.

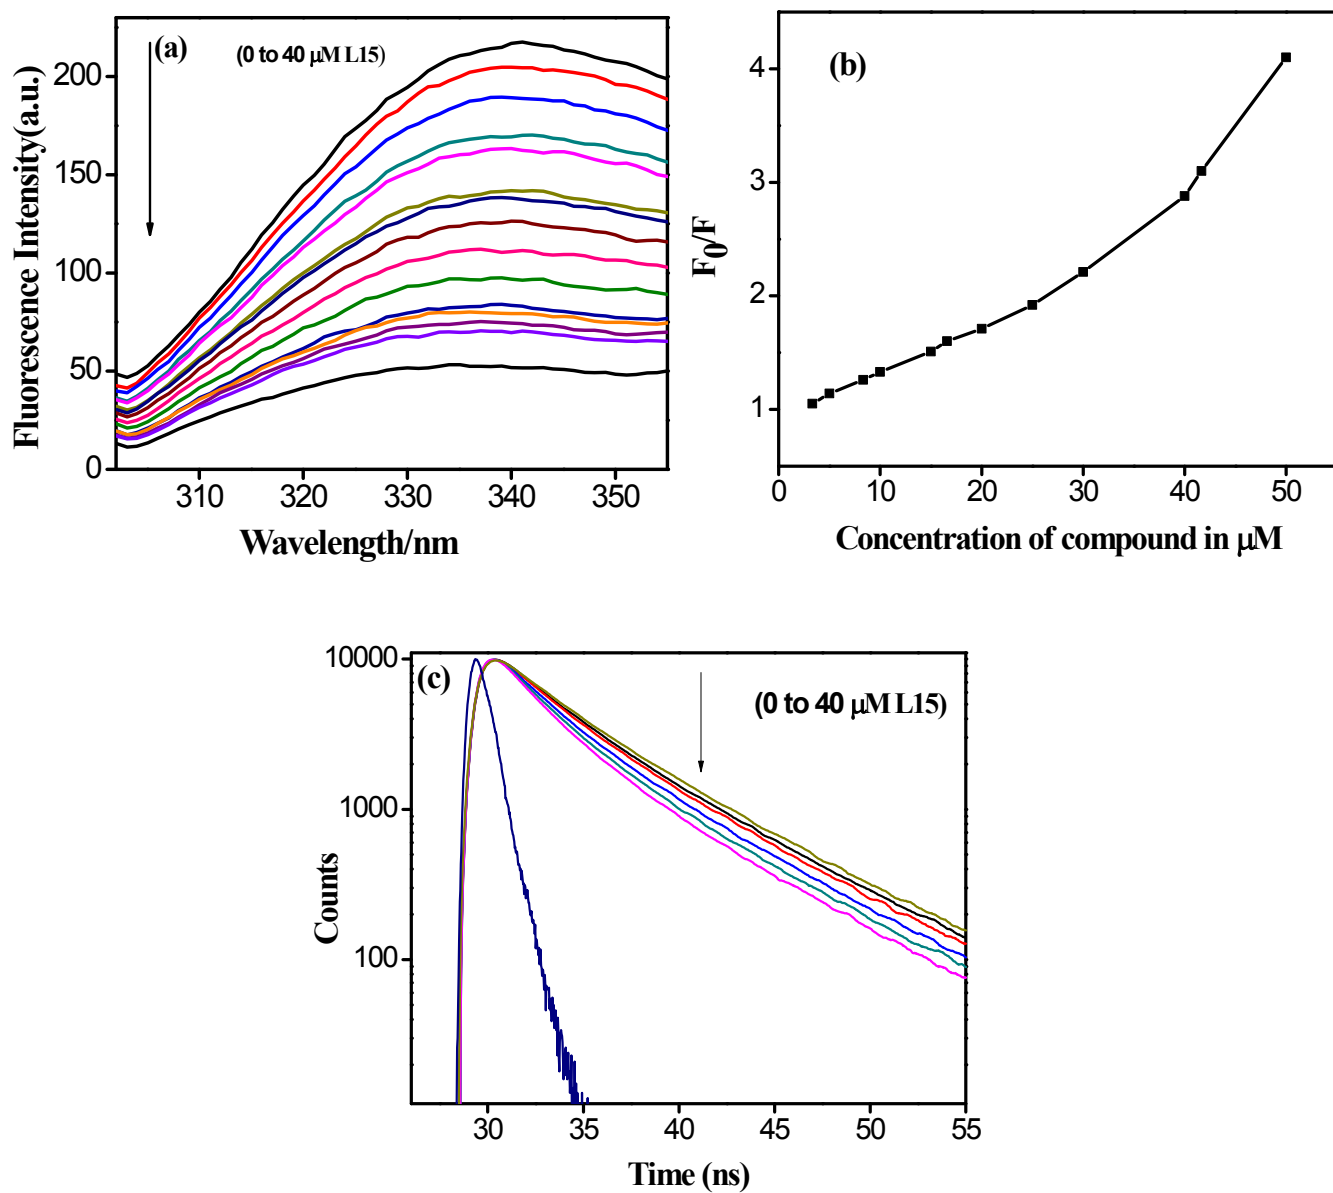

**Fig. S18** a) Fluorescence quenching of HSA (30 μM) by L15 (0 to 40 μM), b) Stern – Volmer plot of probe – protein complexes. c) Time resolved fluorescence quenching decays of HSA (30 μM) in the presence of L15 (0 to 40 μM).

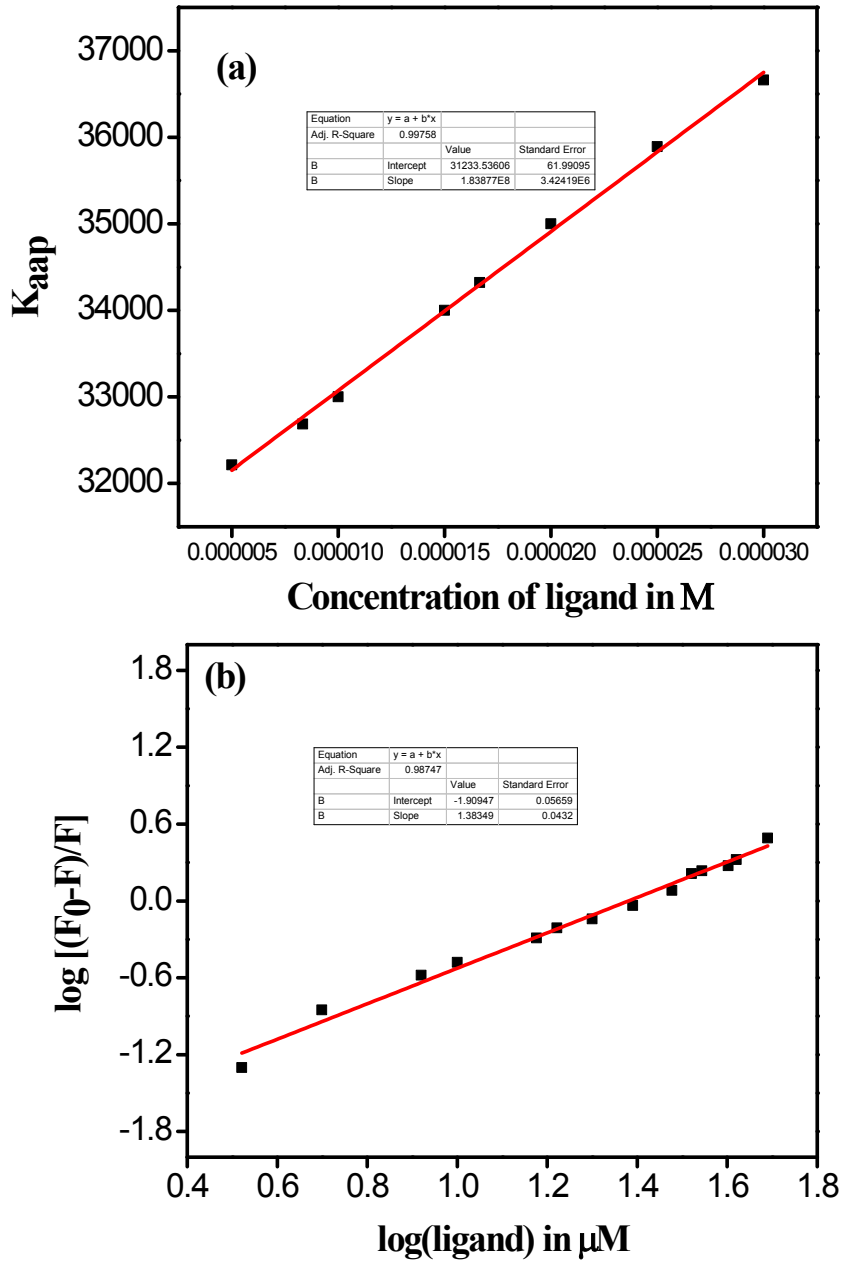

**Fig. S19** a) Plot of  $K_{app}$  Vs the concentration of probe, b) Plot of  $\log [(F_0-F)/F]$  Vs  $\log$  [probe] for probe – protein (HSA) composites in PBS at pH = 7.4.

**Table S4** Quenching parameter of **L15** in the presence of HSA and BSA

|                     | $K_S$ ( $M^{-1}$ ) | $K_D$ ( $M^{-1}$ ) |
|---------------------|--------------------|--------------------|
| <b>L15 with BSA</b> | $7.8 \times 10^3$  | $2.34 \times 10^4$ |
| <b>L15 with HSA</b> | $1.73 \times 10^4$ | $10 \times 10^4$   |

**Table S5** Time resolved fluorescence quenching decay parameters of HSA and BSA in the presence of **L15**

| Serial No | Sample               | $\lambda_{max}$ | $\tau_1$ | $\tau_2$ | $\tau_3$ | $\alpha_1$ | $\alpha_2$ | $\alpha_3$ | $\tau_m$ | $\chi^2$ |
|-----------|----------------------|-----------------|----------|----------|----------|------------|------------|------------|----------|----------|
| 1         | Native BSA           | 345             | 5.33     | 7.865    | -        | .02098     | .00654     | -          | 5.93     | 1.12     |
| 2         | BSA + 5 $\mu$ M dye  | 395             | 3.309    | 6.32     | -        | .009855    | .01858     | -          | 5.27     | 1.06     |
| 3         | BSA + 10 $\mu$ M dye | 395             | 1.053    | 4.227    | 6.758    | .00466     | .0149      | .011       | 4.65     | 1.05     |
| 4         | BSA + 20 $\mu$ M dye | 395             | 3.182    | .593     | 6.259    | .0144      | .0118      | .012       | 3.59     | 1.13     |
| 5         | BSA + 30 $\mu$ M dye | 395             | 3.046    | .537     | 6.550    | .0157      | .0209      | .0078      | 2.48     | 1.11     |
| 6         | BSA + 40 $\mu$ M dye | 395             | 2.959    | .4915    | 7.196    | .0166      | .0312      | .0054      | 1.93     | 1.07     |
| 7         | Native HSA           | 345             | 1.014    | 3.78     | 7.482    | .00767     | .0160      | .0088      | 4.13     | 1.08     |
| 8         | HSA + 5 $\mu$ M dye  | 395             | .818     | 3.318    | 7.189    | .0088      | .01647     | .0093      | 3.72     | 1.09     |
| 9         | HSA + 10 $\mu$ M dye | 395             | .830     | 3.355    | 7.252    | .0101      | .0171      | .0081      | 3.53     | 1.09     |
| 10        | HSA + 20 $\mu$ M dye | 395             | 1.033    | 3.466    | 7.35     | .0134      | .0163      | .0063      | 3.24     | 1.08     |
| 11        | HSA + 30 $\mu$ M dye | 395             | .801     | 2.975    | 6.98     | .0145      | .01768     | .006       | 2.85     | 1.16     |
| 12        | HSA + 40 $\mu$ M dye | 395             | .793     | 2.91     | 6.95     | .017       | .0176      | .0057      | 2.60     | 1.11     |

**Table S6** Association constant of **L15** with proteins

| Probe with protein | Association Constant ( $M^{-1}$ ) |
|--------------------|-----------------------------------|
| <b>L15 + HSA</b>   | $1.23 \times 10^4$                |
| <b>L15 + BSA</b>   | $2.44 \times 10^4$                |

## Docking result

The molecular modeling of the probe with HSA was analyzed using Autodock 4.2. The close view of the molecular simulation analysis clearly ( $<1 \text{ \AA}$ ) showed that the most stable conformations (according to the energy) of **L15**-HSA complex were resulted from the binding of **L15** to the binding site-I of HSA near TRP-214 amino acid. The encapsulation of **L15** in the hydrophobic environment, created by the amino acid residues, along with the presence of  $\pi$ - $\pi$  stacking interaction with TRP-214 led to stabilization of **L15** in the site-I binding pocket of HSA (Fig. S21a, S21c). The molecular simulation analysis demonstrated the existence of two stable conformations of **L15**-HSA complex with negligible energy difference of  $0.03 \text{ K.cal.mole}^{-1}$ . In the second conformation, the hydrophobic interaction of **L15** with nonpolar amino acids residues and the hydrogen bonding between the  $-\text{OH}$  group of **L15** and the carboxylic acid group of glutamine with a distance of  $2.014 \text{ \AA}$  further enhanced the binding interaction of **L15** at site-I of HSA (Fig. S20a, S20c). Moreover, the cluster distribution showed that **L15** has almost equal distribution in two binding sites (one arises from  $\pi$ - $\pi$  stacking and another one from H-bonding) with  $7 \text{ \AA}$  (in the case of  $\pi$ - $\pi$  stacking) and  $24.04 \text{ \AA}$  (in the case of H-bonding) intermolecular distances from TRP-214 of HSA (Fig. S20b, Fig. S20d, Fig. S21b). Interestingly, experimental findings from FRET process revealed a  $25.46 \text{ \AA}$  intermolecular distance between **L15** and tryptophan residue of HSA which was in close agreement with the molecular simulation results ( $24 \text{ \AA}$ ) for the second conformation. However, for the first conformation, the computational distance was bit different from the FRET calculated one (Fig. S21b). As reported in the literature<sup>6</sup>, this could be possibly due to the difference in the X-ray structure of the protein from crystals and from the aqueous system (the experimental medium). As a result, there are many factors including difference in the microenvironment are not considered during docking studies.

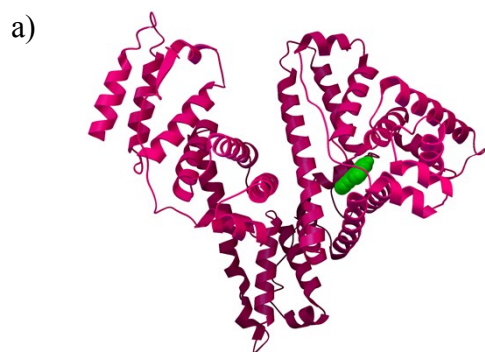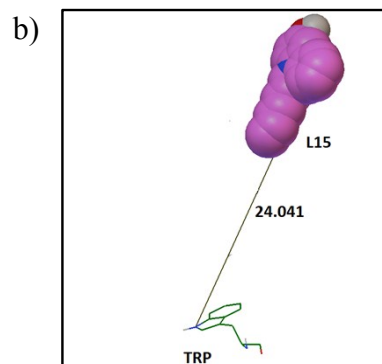

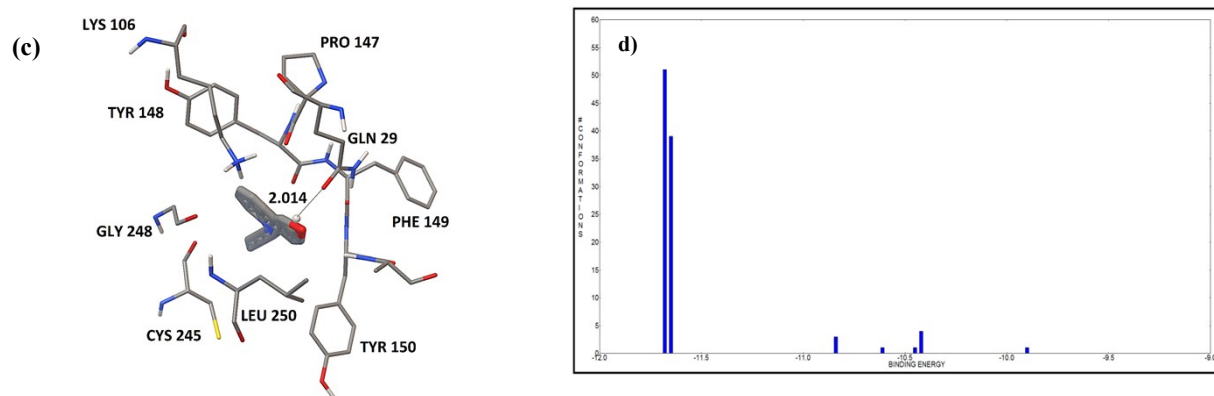

**Fig. S20** a) Protein- L15 complex in 2nd conformation, b) distance between TRP 214 and L15 in 2nd conformation, c) contact amino acid residues in protein-L15complex in 2nd conformation, d) cluster distribution picture of L15-protein complex conformations.

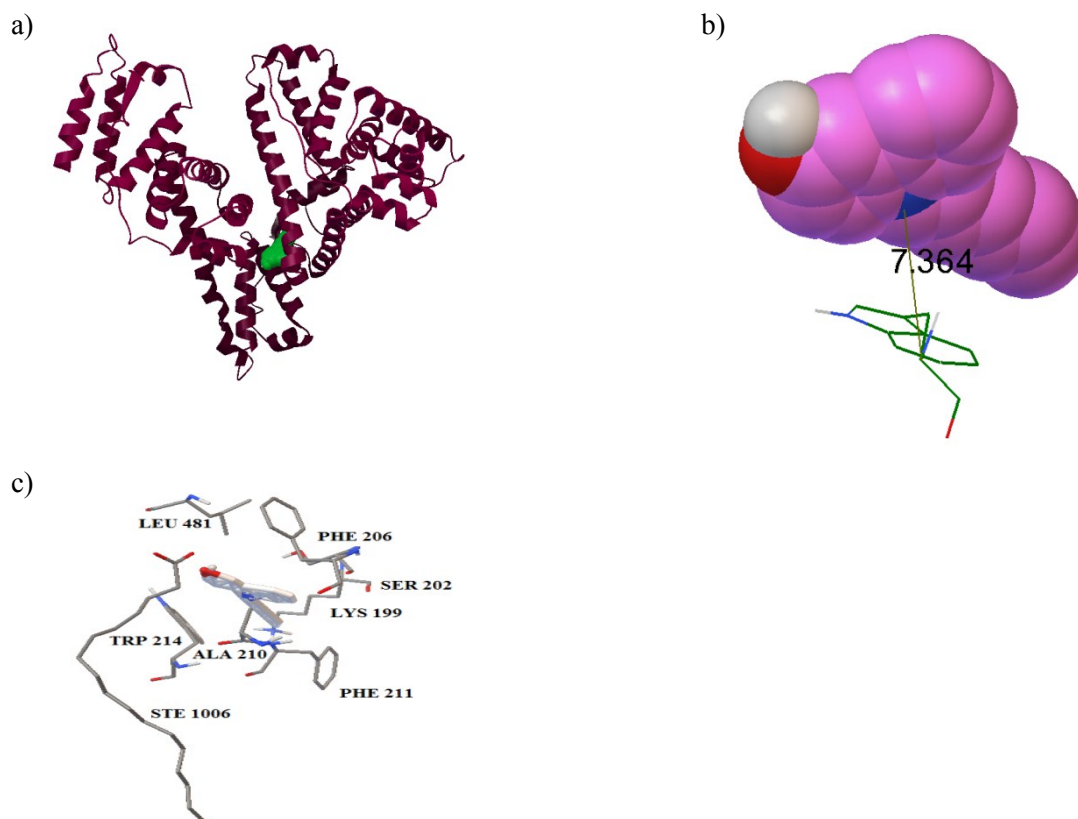

**Fig. S21** a) Protein- L15 complex in 1<sup>st</sup> conformation, b) distance between TRP 214 and L15 in 1<sup>st</sup> conformation, c) contact amino acid residues in protein-L15complex in 1<sup>st</sup> conformation.



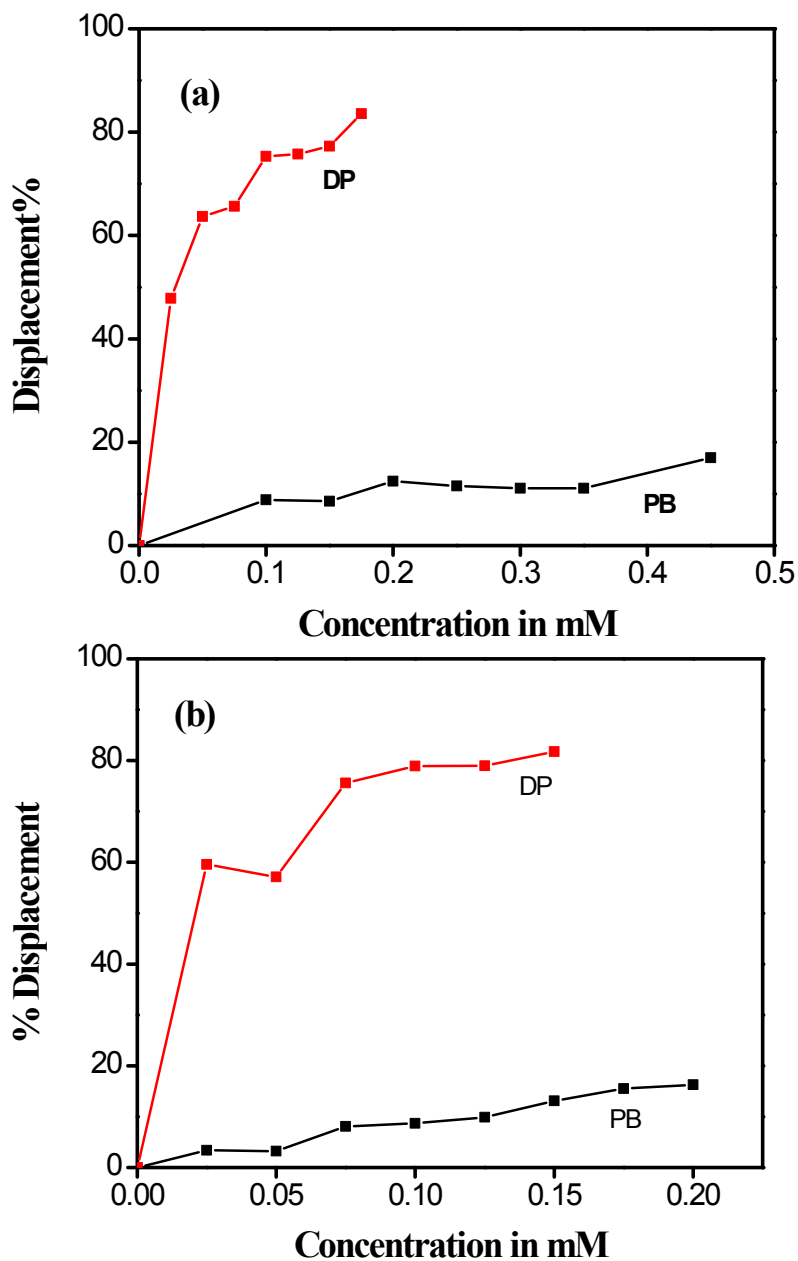

**Fig. S22** (a) Displacement of **L15** (%) from BSA-**L15** complex upon the addition of PB and DP and (b) Displacement of probe **L15** (%) from the HSA-**L15** complex upon the addition of PB and DP.

**Table S7** Photophysical parameters of **L15** in the presence of protein

| Compound   | Protein | Anisotropy | $\phi$ | $K_{n,r} \times 10^8 (S^{-1})$ | $\Delta G(kj mol^{-1})$ |
|------------|---------|------------|--------|--------------------------------|-------------------------|
| <b>L15</b> | -       | .002       | .003   | 12.2                           | -                       |
| <b>L15</b> | BSA     | .041       | .213   | 1.1                            | -28                     |
| <b>L15</b> | HSA     | .03        | .215   | 1.11                           | - 23.33                 |

**"FRET Processes:** We observed that the absorption spectra of **L15** overlaps with the emission spectra of BSA/HSA. As these events lead to efficient energy transfer from probe to protein resulting in fluorescence signaling through FRET process, we became curious to use FRET technique in order to know the distance between the tryptophan unit of protein and the **L15** in protein–**L15** complex. While BSA/HSA showed strong absorption at 295 nm with emission range 300-380 nm (when excited at 295 nm),<sup>7</sup> the probe **L15** alone showed very poor absorption at 295 nm with negligible emission when excited at 295 nm (Fig. S23). The probe **L15** showed strong absorption at 304 nm with a strong emission at 395 nm when excited at 304 nm. Detailed overlap integral picture is shown in Fig. S24. All these results indicated that when HSA/BSA were excited at 295 nm in the presence of **L15** the protein emission was absorbed by **L15** (FRET process) resulting in strong emission at 395 nm from **L15** (Fig. 2a, Fig. S25). The energy transfer efficiency (E) is related to the distance between tryptophan and probe (R), and was calculated using the following equation,

$$E = R_0^6 / (R_0^6 + r^6) = 1 - F_0/F$$

Here **F** is the fluorescence intensity of BSA/HSA in the presence of **L15**, **F<sub>0</sub>** is the fluorescence intensity of BSA/HSA alone, **r** is the distance between the acceptor (**L15**) and donor (protein) molecule, **R<sub>0</sub>** is the distance between donor and acceptor when energy transfer efficiency is 50%. **R<sub>0</sub>** was calculated using the following equation,

$$R_0 = 0.211[k^2n^{-4}\Phi_D J(\lambda)]^{1/6}$$

The **R<sub>0</sub>** value for BSA and HSA were calculated to be 25.22 Å and 25.46 Å respectively which were in good agreement with the FRET process. Here **k<sup>2</sup>** is the orientation factor, **n** is the refractive index of the medium, **Φ<sub>D</sub>** is the quantum yield of the donor, **J** is the spectral integral of

the donor emission spectra and acceptor's absorption spectra.  $J$  is calculated from the following equation,

$$J = \frac{\int_0^{\infty} F_D(\lambda) \varepsilon(\lambda) \lambda^4 d\lambda}{\int_0^{\infty} F_D(\lambda) d\lambda}$$

Here  $F_D$  represents fluorescent intensity of donor at wavelength  $\lambda$  and  $\varepsilon$  is molar extinction coefficient of acceptor at wavelength  $\lambda$ . In the present case, the values of  $k$ ,  $n$  and  $\Phi_D$  are 2/3, 1.336, 0.118 respectively.  $J$  is obtained by integrating the overlapped portion of donor's emission and acceptor's absorption spectra shown in Fig. S24. The values of  $J$  for BSA and HSA were in the order of  $10^{14}$ , and  $r$  values are 17.73 Å and 21.05 Å for BSA and HSA respectively. These  $r$  values suggested that the tryptophan unit is close to probe molecule in protein-probe complex, and therefore the quenching of tryptophan emission is due to efficient energy transfer from tryptophan to probe (Fig. S26).

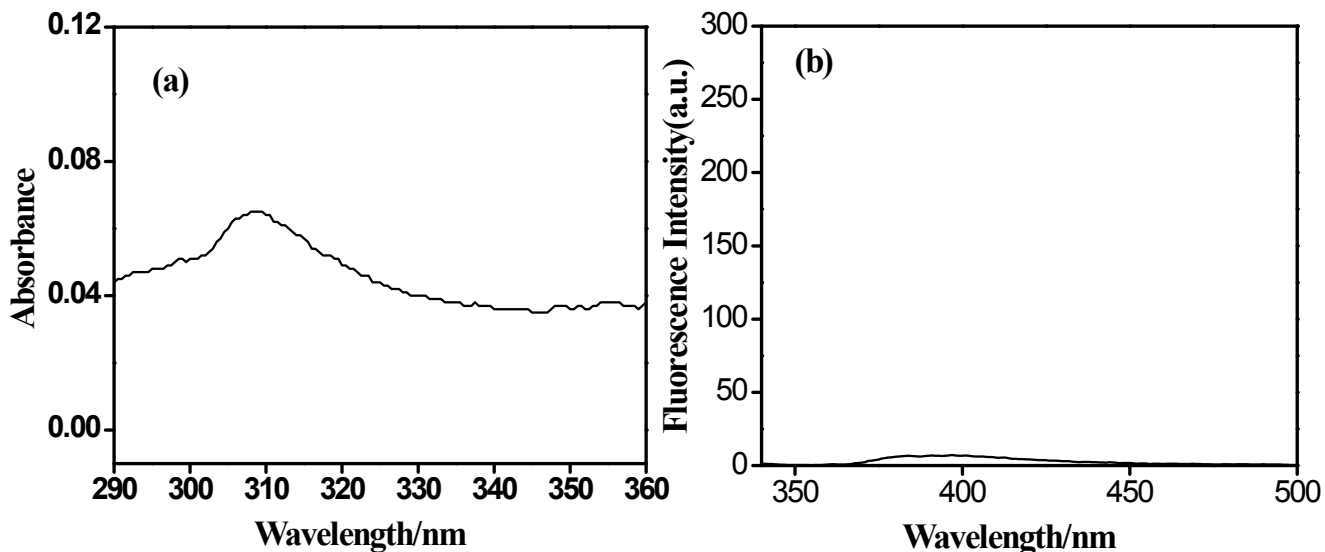

**Fig. S23** a) UV-vis spectra of L15, b) fluorescence emission spectra of L15 while excitation at 295 nm of wavelength.

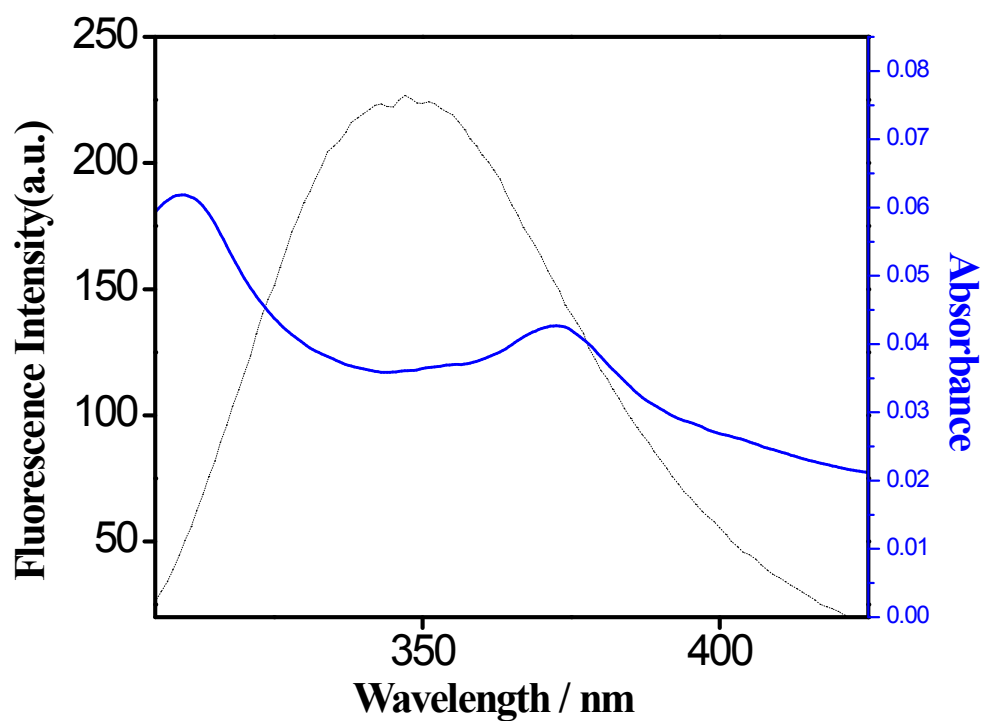

**Fig. S24** The overlap of the fluorescence spectra of HSA (dotted line) and the absorption spectra of L15 (solid line).

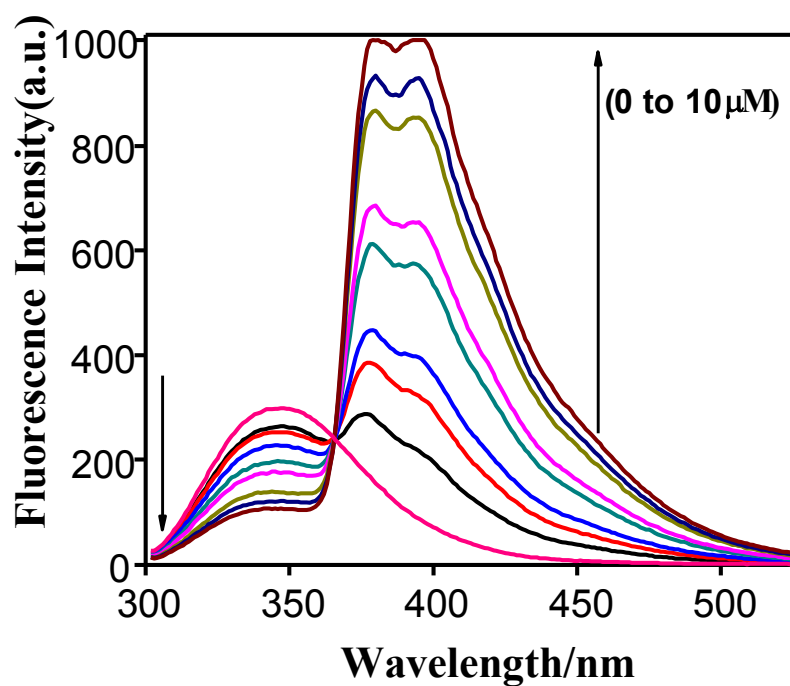

**Fig. S25** Fluorescence emission spectra of BSA (10 $\mu$ M) with increasing concentration of L15 (0-10  $\mu$ M).

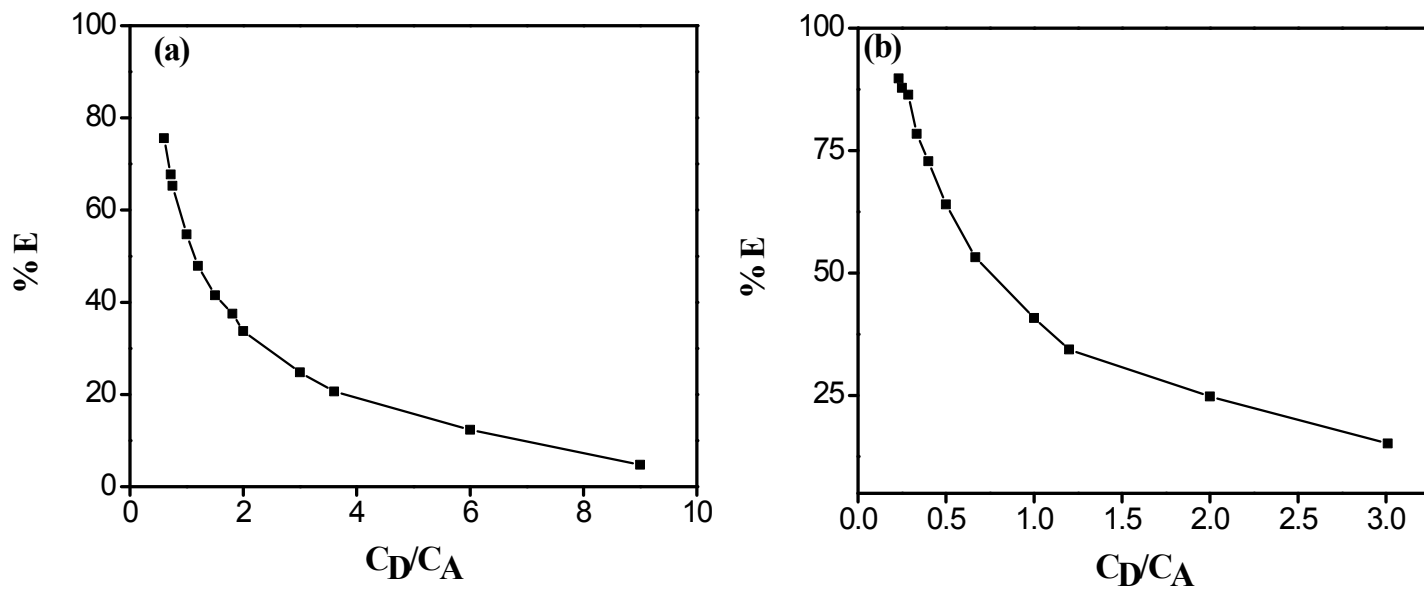

**Fig. S26** Energy transfer efficiency (in percentage) from a) HSA to L15, b) BSA to L15.

**Table S8** Energy transfer parameter for different protein probe composites

|                  | <b>Molar extinction coefficient</b> | <b>J</b><br>( $M^{-1}cm^{-1}nm^4$ ) | <b><math>R_0</math></b><br>( $\text{\AA}$ ) | <b>r</b><br>( $\text{\AA}$ ) | <b>E</b> |
|------------------|-------------------------------------|-------------------------------------|---------------------------------------------|------------------------------|----------|
| <b>L15 + HSA</b> | $1.303 \times 10^3$                 | $1.1943 \times 10^{14}$             | 25.46                                       | 21.05                        | 0.7561   |
| <b>L15 + BSA</b> | $1.303 \times 10^3$                 | $1.20 \times 10^{14}$               | 25.223                                      | 17.738                       | 0.89735  |

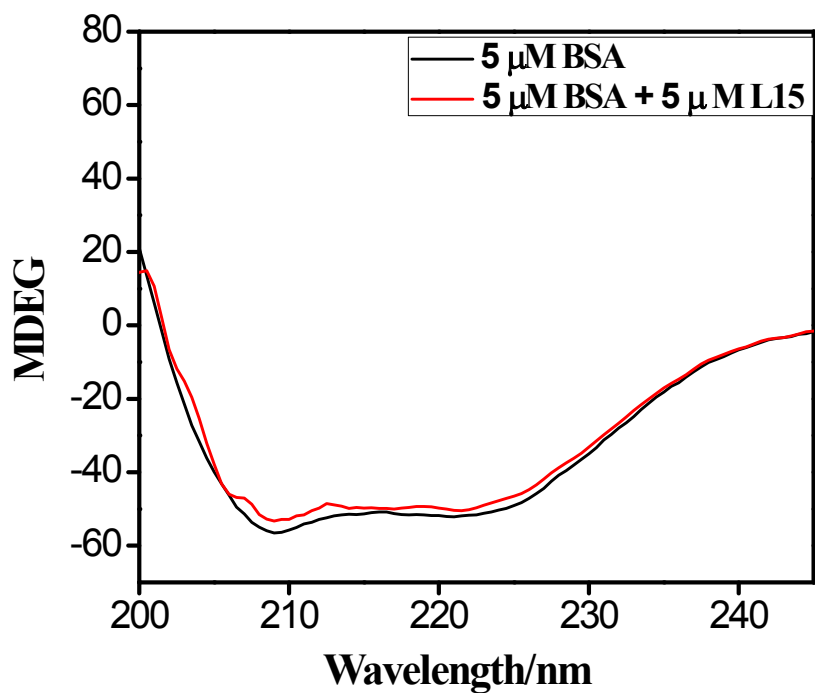

Fig. S27 Circular dichroism spectra of BSA in the presence of L15 in PBS (10X).

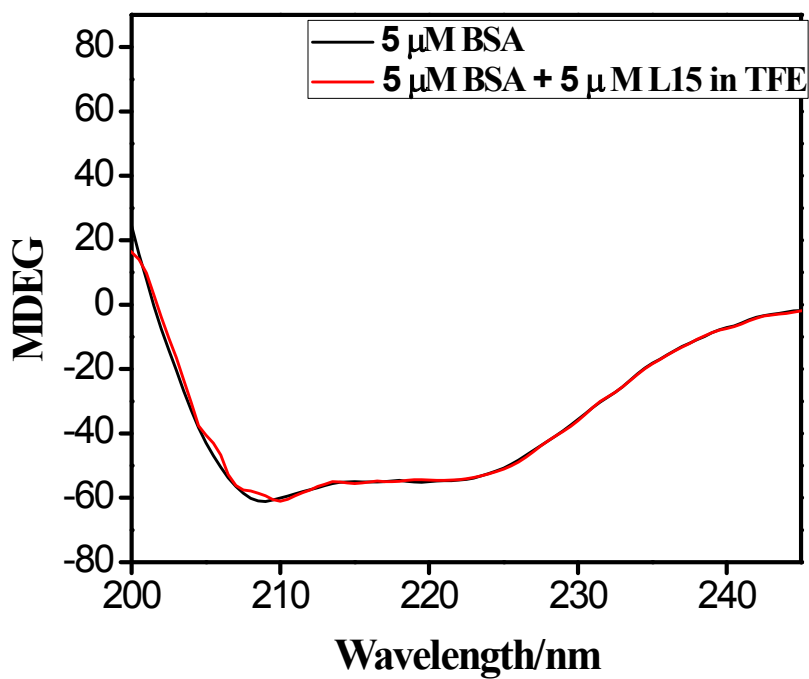

**Fig. S28** Circular dichroism spectra of BSA in the presence of L15 in 10 % TFE and 90 % PBS (10X).

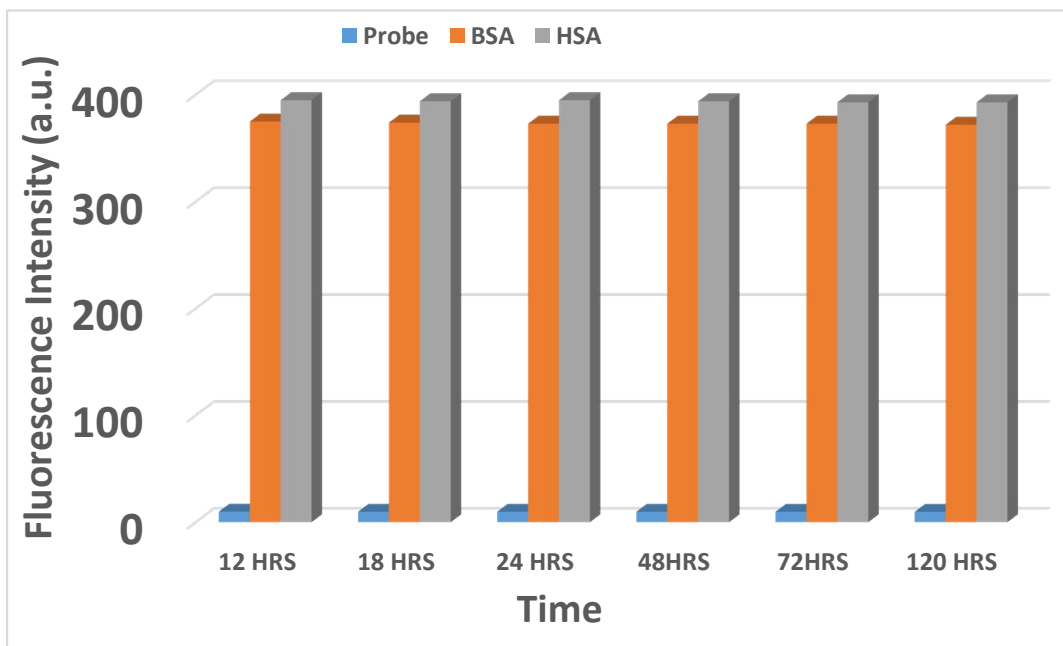

**Fig. S29** Photostability of L15 in laboratory condition.

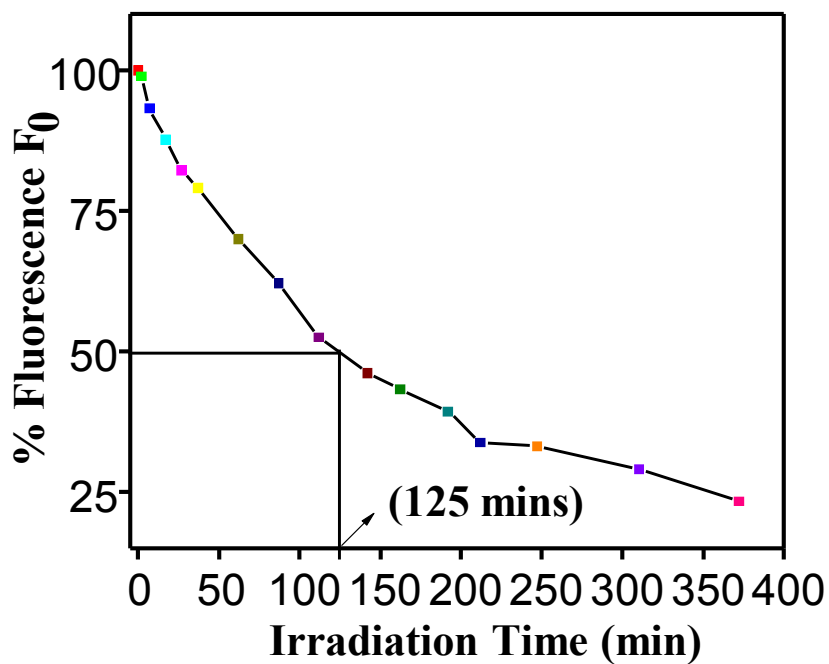

**Fig. S30** Photostability of **L15** in the presence of 5  $\mu\text{M}$  HSA and illuminated by laser - light

(488 nm, 145mW)

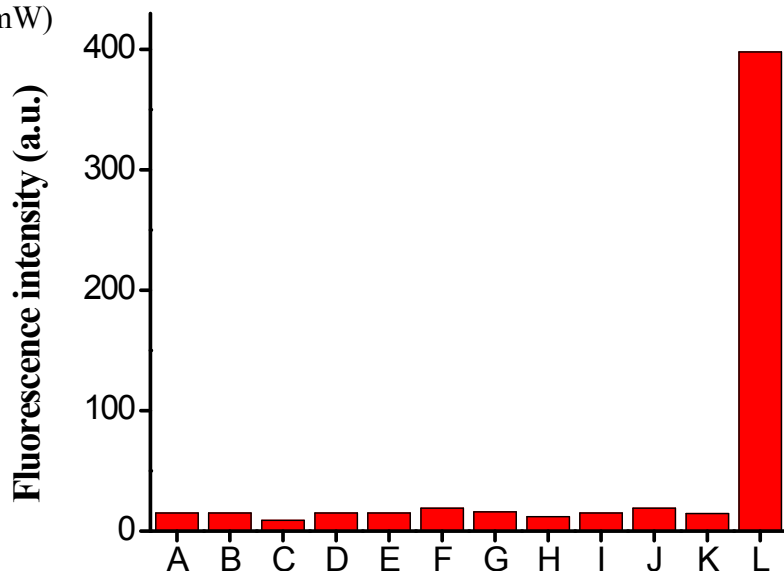

**Fig. S31** Fluorescence response of **L15** (5  $\mu\text{M}$ ) in the presence of different cations. [A =  $\text{Na}^+$ , B =  $\text{Zn}^{2+}$ , C =  $\text{Ni}^+$ , D =  $\text{K}^+$ , E =  $\text{Al}^{3+}$ , F =  $\text{Fe}^{2+}$ , G =  $\text{Cd}^{2+}$ , H =  $\text{Cu}^{2+}$ , I =  $\text{Hg}^{2+}$ , J =  $\text{Ca}^{2+}$ , K =  $\text{Cu}^+$ , L = HSA.] Here the concentrations of all cations are 20  $\mu\text{M}$ .

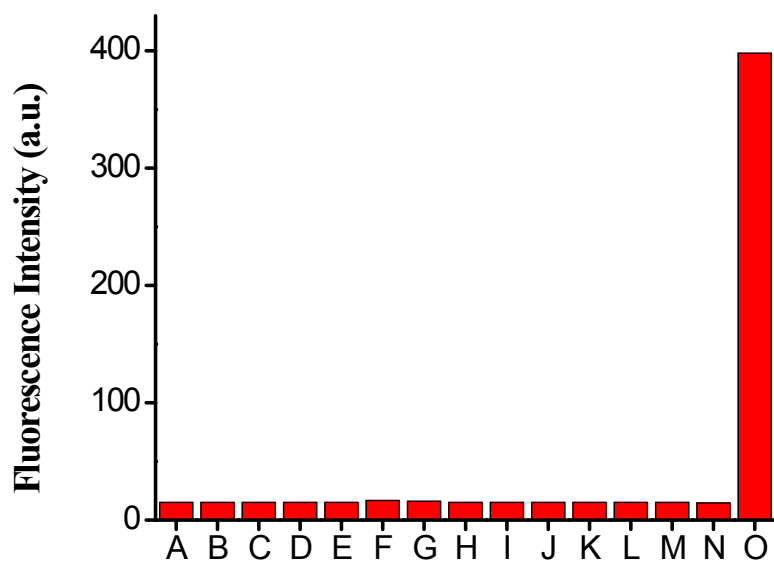



**Fig. S32** Fluorescence response of **L15** (5  $\mu\text{M}$ ) in the presence of different anions. [A =  $\text{I}^-$ , B =  $\text{Br}^-$ , C =  $\text{F}^-$ , D =  $\text{OAc}^-$ , E =  $\text{Cl}^-$ , F =  $\text{CO}_3^{2-}$ , G =  $\text{SO}_4^{2-}$ , H =  $\text{SO}_3^{2-}$ , I =  $\text{HS}^-$ , J =  $\text{ClO}_3^-$ , K =  $\text{S}_2\text{O}_3^{2-}$ , L =  $\text{NO}_3^-$ , M =  $\text{NO}_2^-$ , N =  $\text{C}_2\text{O}_4^{2-}$ , O = HSA.] Here the concentrations of all anions are 20  $\mu\text{M}$ .

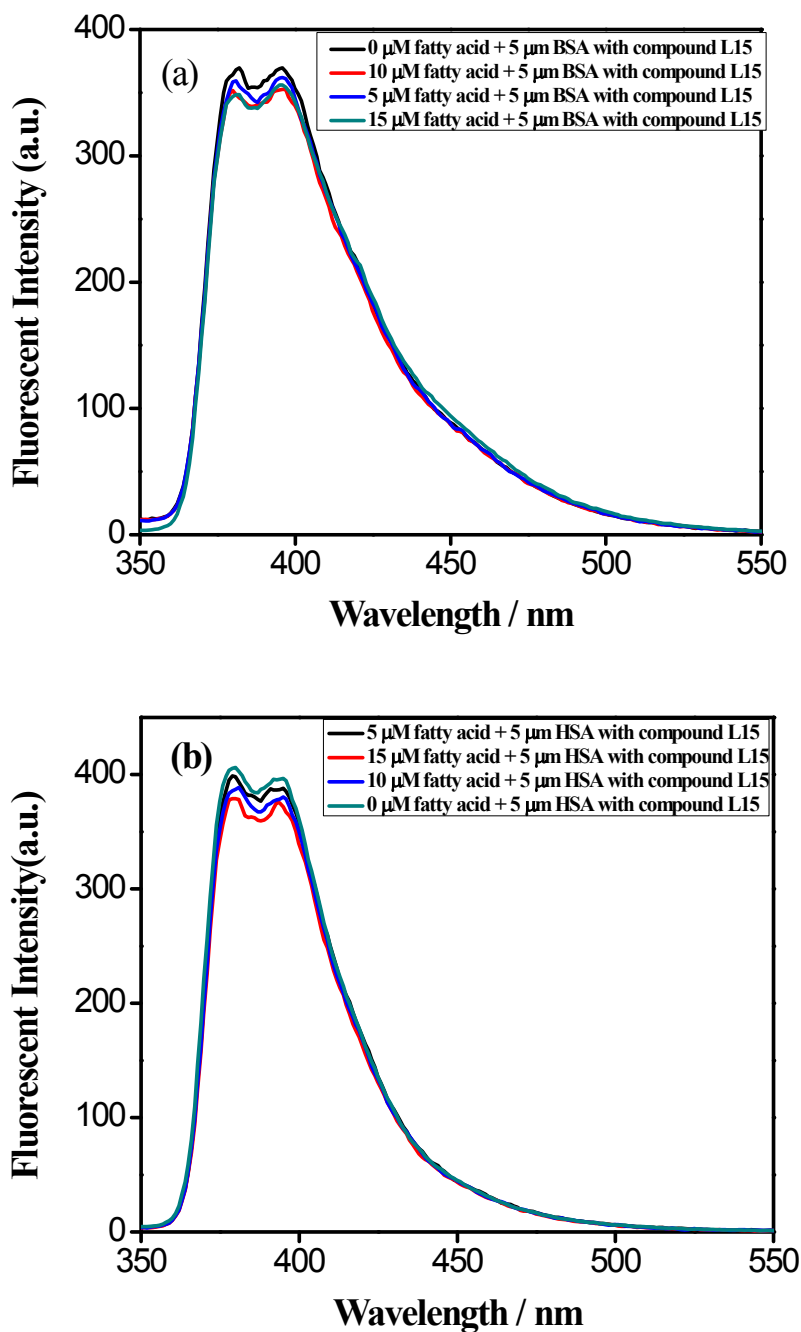

**Figure S33.** The effect of fatty acid (isovaleric acid) (5  $\mu\text{M}$ ) on fluorescence emission spectra of (a) **L15** in the presence of BSA (5  $\mu\text{M}$ ); (b) **L15** in the presence of HSA (5  $\mu\text{M}$ ).

**Table S9** Interaction of **L15** with blood serum - analytical parameters

| Compound   | Protein            | Linear Range             | Regression Equation     | Co-efficient |
|------------|--------------------|--------------------------|-------------------------|--------------|
| <b>L15</b> | HSA in blood serum | 0.001 - .4 $\mu\text{M}$ | $I_f = 548.11C + 30.72$ | 0.9863       |

**Table S10** Interaction of **L15** with HSA in 10 % urine - analytical parameters

| Compound   | Protein            | Linear Range             | Regression Equation      | Co-efficient |
|------------|--------------------|--------------------------|--------------------------|--------------|
| <b>L15</b> | HSA in Urine (10%) | 0.02 - .75 $\mu\text{M}$ | $I_f = 119.91 C + 45.16$ | 0.99         |

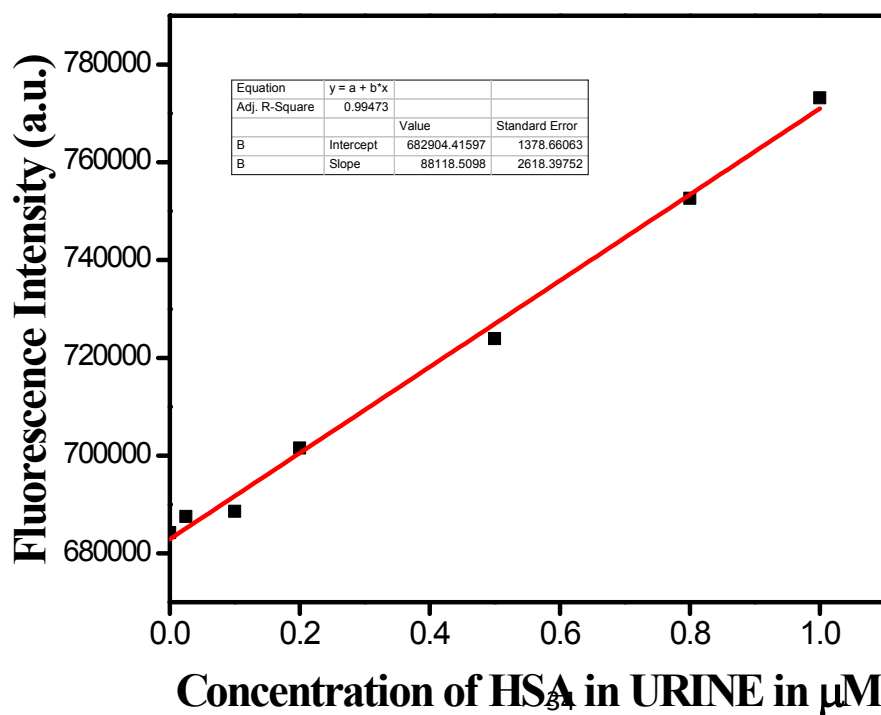

**Fig. S34** Fluorescence response of **L15** (10  $\mu$ M) toward HSA in undiluted urine.

**Table S11** Interaction of **L15** with HSA in urine - analytical parameters

| <b>Compound</b> | <b>Protein</b> | <b>Linear Range</b> | <b>Regression Equation</b> | <b>Co-efficient</b> |
|-----------------|----------------|---------------------|----------------------------|---------------------|
| <b>L15</b>      | HSA in Urine   | 0.025 - 1 $\mu$ M   | $I_f = 88118.5 C + 682904$ | 0.99                |

### General procedure for the synthesis of 6 – 10:

Alkylation of carbazole was done following literature procedure.<sup>8</sup> Alkylated product (1 equiv) was dissolved in dry DMF at 0 °C. After that, phosphorus oxychloride (1.5 equiv) was added in the solution with vigorous stirring at 0 °C under nitrogen atmosphere. Then the reaction mixture was allowed to come to room temperature and left stirring for 20 min followed by microwave heating (P = 10, T = 105 °C) for 30 minutes. The resulting mixture was then cooled to room temperature and extracted with ethyl acetate and water. The organic layer was collected and dried over anhydrous sodium sulfate. The volatiles were removed under vacuum, the crude product was purified using column chromatography.

### [9-ethyl-9H-carbazole-3-carbaldehyde] (6)

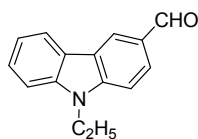

**<sup>1</sup>H-NMR (500 MHz, CDCl<sub>3</sub>):** δ 10.07(s, 1H), 8.58(s, 1H), 8.14(d, *J* = 8.25 Hz, 1H), δ 8.0(d, *J* = 8.95 Hz, 1H), δ 7.54 – 7.51(m, 1H), 7.45(d, *J* = 8.95 Hz, 2H), 7.33(t, *J* = 7.55 Hz, 1H), 4.39 – 4.35(m, 2H), 1.46(t, *J* = 7.55 Hz, 3H).

**<sup>13</sup>C-NMR (125 MHz, CDCl<sub>3</sub>):** δ 191.8, 143.5, 140.6, 128.4, 127.1, 126.7, 123.9, 123.1, 122.9, 120.7, 120.2, 109.1, 108.6, 37.9, 13.8.

**HRMS (ESI):** Calc. for C<sub>15</sub>H<sub>13</sub>NO [M]<sup>+</sup> : 223.0097; Found: 224.1081.

**IR** ν<sub>max</sub> : 3054, 2980, 2827, 2746, 2356, 1668, 1577, 1329, 1223 cm<sup>-1</sup>.

**Physical Properties:** Yellow solid (960 mg, 84% yield, 4.29 mmol, m.p. 85 °C).

**[9-butyl-9H-carbazole-3-carbaldehyde] (7)**

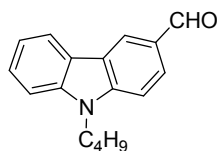

**<sup>1</sup>H-NMR (500 MHz, CDCl<sub>3</sub>):** δ 9.97(s, 1H), 8.48(s, 1H), 8.04(d, *J* = 7.55 Hz, 1H), 7.9(dd, *J* = 8.9, 1.37 Hz, 1H), 7.44 – 7.41(m, 1H), 7.35(d, *J* = 8.95 Hz, 2H), 7.23(t, *J* = 7.55 Hz, 1H), 4.21(t, *J* = 7.22 Hz, 2H), 1.78 – 1.72(m, 2H), 1.33 – 1.16(m, 2H), 0.86(t, *J* = 7.6 Hz, 3H).

**<sup>13</sup>C-NMR (125 MHz, CDCl<sub>3</sub>):** δ 191.5, 143.7, 140.8, 128.1, 126.8, 126.4, 123.6, 122.7, 122.6, 120.4, 119.9, 109.1, 108.6, 42.8, 330.7, 20.2, 13.6.

**HRMS (ESI):** Calc. for C<sub>17</sub>H<sub>18</sub>NO [M+H]<sup>+</sup>: 252.1388; Found: 252.1383.

**IR** *v*<sub>max</sub>: 2954, 2872, 2727, 2356, 1685, 1594, 1468, 1332 cm<sup>-1</sup>.

**Physical Properties:** Yellow viscous liquid (980 mg, 87.1% yield, 4.38 mmol).

**[9-hexyl-9H-carbazole-3-carbaldehyde] (8)**

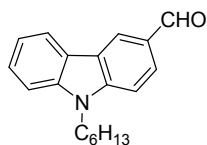

**<sup>1</sup>H-NMR (500 MHz, CDCl<sub>3</sub>):** δ 10.09(s, 1H), 8.6(s, 1H), 8.16(d, *J* = 8.2 Hz, 1H), 8.01 – 7.99(m, 1.7 Hz, 1H), 7.55 – 7.52(m, 1H), 7.47 – 7.44(m, 2H), 7.33 – 7.3(m, 1H), 4.33(t, *J* = 7.55 Hz, 2H), 1.9 – 1.84(m, 2H), 1.4 – 1.22(m, 6H), 0.88(t, *J* = 6.85 Hz, 3H).

**<sup>13</sup>C-NMR (125 MHz, CDCl<sub>3</sub>):** δ 191.8, 144.1, 141.1, 128.4, 127.1, 126.7, 122.9, 120.7, 120.2, 109.4, 108.9, 43.4, 31.5, 28.9, 26.9, 22.5, 13.7.

**HRMS (ESI):** Calc. for C<sub>19</sub>H<sub>21</sub>NO [M+H]<sup>+</sup>: 280.1701; Found: 280.1696.

IR  $\nu_{\max}$  : 2918, 2854, 2718, 2365, 1688, 1586, 1468, 1332  $\text{cm}^{-1}$ .

**Physical Properties:** Yellow solid (1 gm., 90 % yield, 3.57 mmol, m.p. 54 °C).

**[9-octyl-9H-carbazole-3-carbaldehyde] (9)**

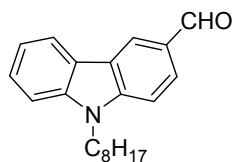

**$^1\text{H-NMR}$  (500 MHz,  $\text{CDCl}_3$ ):**  $\delta$  10.08(s,1H), 8.59(s, 1H), 8.14(d,  $J = 7.55$  Hz, 1H), 8.005(dd,  $J = 8.25, 1.37$  Hz, 1H), 7.54 – 7.51(m, 1H), 7.45 – 7.43(m, 2H), 7.33(t,  $J = 7.55$  Hz, 1H), 4.31(t,  $J = 7.225$  Hz, 2H), 1.88 – 1.85(m, 2H), 1.38 – 1.20(m, 10H), 0.86(t,  $J = 6.85$  Hz, 3H).

**$^{13}\text{C-NMR}$  (125 MHz,  $\text{CDCl}_3$ ):**  $\delta$  191.8, 144.0, 141.1, 128.4, 127.1, 126.7, 123.9, 122.96, 122.9, 120.7, 120.2, 109.3, 108.9, 43.4, 31.7, 29.3, 29.1, 28.9, 27.2, 22.6, 14.0.

**HRMS (ESI):** Calc. for  $\text{C}_{19}\text{H}_{21}\text{NO}$   $[\text{M}+\text{H}]^+$  : 308.2014; Found: 308.2013.

IR  $\nu_{\max}$  : 2918, 2854.71, 2709, 2364.9, 1685.69, 1585.5, 1468.3, 1332.1  $\text{cm}^{-1}$ .

**Physical Properties:** Yellow solid (1 gm., 84% yield, 3.24 mmol, m.p. 53 °C).

**[9-decyl-9H-carbazole-3-carbaldehyde] (10)**

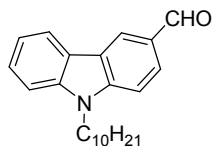

**$^1\text{H-NMR}$  (500 MHz,  $\text{CDCl}_3$ ):**  $\delta$  9.98(s, 1H), 8.49(s, 1H), 8.05(d,  $J = 7.55$  Hz, 1H), 7.91(d,  $J = 6.85$  Hz, 1H), 7.45 – 7.41(m, 1H), 7.36 – 7.34(m, 2H), 7.24 – 7.21(m, 1H), 4.22(t,  $J = 7.2$  Hz, 2H), 1.79 – 1.76(m, 2H), 1.29 – 1.1(m, 14H), 0.79(t,  $J = 7.22$  Hz, 3H).

**$^{13}\text{C-NMR}$  (125 MHz,  $\text{CDCl}_3$ ):**  $\delta$  191.7, 143.9, 141.1, 128.4, 126.6, 122.9, 122.9, 120.7, 120.2, 109.3, 108.9, 43.3, 31.8, 29.4, 29.4, 29.3, 19.2, 27.2, 22.6, 14.1.

**HRMS (ESI):** Calc. for C<sub>23</sub>H<sub>29</sub>NO [M+H]<sup>+</sup> : 336.2327; Found: 336.2380.

**IR**  $\nu_{\max}$  : 2927, 2855, 2710, 2365, 1683, 1585, 1468, 1332 cm<sup>-1</sup>.

**Physical Properties:** Yellow solid (920 mg, 84.4% yield, 2.82 mmol, m.p. 64 °C).

#### **Procedure for the synthesis of L11:**

Compound **L9** (1 equiv) was first dissolved in acetone (10 mL) followed by addition of potassium permanganate (4 equivs) under nitrogen atmosphere, and the reaction mixture was refluxed for 5 h at 75 °C. After that the reaction mixture was cooled to room temperature and filtered through sintered funnel. The filtrate was extracted with water and the organic layer was collected. The organic layer was dried over anhydrous sodium sulfate and the volatiles were removed under vacuum. The crude product was purified through column chromatography.

#### **[9-octyl-9H-carbazole-3-carboxylic acid] (L11)**

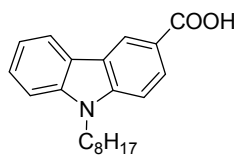

**<sup>1</sup>H-NMR (500 MHz, CDCl<sub>3</sub>):**  $\delta$  8.83(s, 1H), 8.17(d, *J* = 7.55 Hz, 1H), 8.08(d, *J* = 7.55 Hz, 1H), 7.44 – 7.41(m, 1H), 7.34 – 7.3(m, 2H), 7.23 – 7.2(m, 1H), 4.21(t, *J* = 8.075 Hz, 2H), 1.8 – 1.76(m, 2H), 1.75 – 1.12(m, 10H), 0.78 – 0.76(t, *J* = 6.85 Hz, 3H).

**<sup>13</sup>C-NMR (125 MHz, CDCl<sub>3</sub>):**  $\delta$  173.2, 143.6, 140.9, 127.8, 126.4, 123.7, 122.9, 122.6, 120.7, 119.9, 119.6, 109.3, 108.2, 43.3, 31.7, 29.3, 29.1, 28.9, 27.2, 22.6, 14.0.

**HRMS (ESI):** Calc. for C<sub>21</sub>H<sub>25</sub>NO<sub>2</sub> [M+H]<sup>+</sup> : 324.1964; Found: 324.2077.

**IR**  $\nu_{\max}$  : 2926, 2855, 2645, 2519, 2365, 1667, 1595, 1169 cm<sup>-1</sup>.

**Physical Properties:** Yellow solid (165 mg, 39.28 % yield, 0.051 mmol, m.p. 146 °C).

#### **General procedure for the synthesis of L12 – L16**

The carbaldehyde derivatives **L6-10** (1 equiv) were taken in a round bottomed flask and dry methanol was added in nitrogen atmosphere. After that hydrogen peroxide (30 % , 1 equiv) ,

concentrated sulphuric acid (0.1 equiv) was added in the reaction mixture in 0 °C in nitrogen atmosphere and the reaction mixture was allowed to stir at room temperature for 2 h. After completion of reaction, as judged by TLC, methanol was removed under vacuum, and the crude was extracted with ethyl acetate and water. The organic layer was collected and dried over anhydrous sodium sulfate, and the volatiles were removed under vacuum. The crude product was purified through column chromatography.

**[9-ethyl-9H-carbazol-3-ol] (L12)**

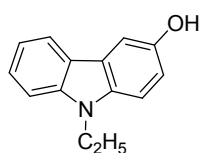

**<sup>1</sup>H-NMR (500 MHz, CDCl<sub>3</sub>):** δ 7.98(d, *J* = 7.6 Hz, 1H), 7.5(d, *J* = 2.75 Hz, 1H), 7.45 – 7.41(m, 1H), 7.35(d, *J* = 8.25 Hz, 1H), 7.24(d, *J* = 8.9 Hz, 1H), 7.17 – 7.14(m, 1H), 7.02 – 7(m, 1H), 4.31 – 4.27(m, 2H), 1.39(t, *J* = 7.22 Hz, 3H).

**<sup>13</sup>C-NMR (125 MHz, CDCl<sub>3</sub>):** δ 148.7, 140.5, 135, 125.7, 123.5, 122.4, 120.5, 118.2, 114.5, 108.9, 108.5, 105.9, 37.5, 13.8.

**HRMS (ESI):** Calc. for C<sub>14</sub>H<sub>13</sub>NO [M]<sup>+</sup> : 211.0997; Found: 212.1069.

**IR**  $\nu_{\max}$  : 3280, 3051, 2972, 2347, 1677, 1459, 1350, 1178 cm<sup>-1</sup>.

**Physical Properties:** White solid (380 mg, 40.16% yield, 1.8 mmol, m.p. 112 °C).

**[9-butyl-9H-carbazol-3-ol] (L13)**

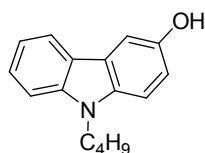

**<sup>1</sup>H-NMR (500 MHz, CDCl<sub>3</sub>):** δ 7.99(d, *J* = 7.6 Hz, 1H), 7.51(s, 1H), 7.45 – 7.42(m, 1H), 7.36(d, *J* = 8.25 Hz, 1H), 7.26(d, *J* = 8.95 Hz, 1H), 7.18 – 7.15(m, 1H), 7.03(dd, *J* = 8.6, 2.4 Hz, 1H), 4.96(s, broad, 1H), 4.25(t, *J* = 7.2 Hz, 2H), 1.84 – 1.78(m, 2H), 1.39 – 1.35(m, 2H), 0.94(t, *J* = 7.22 Hz, 3H).



**<sup>13</sup>C-NMR (125 MHz, CDCl<sub>3</sub>):** δ 148.7, 141.0, 135.5, 125.6, 123.3, 122.2, 120.4, 118.1, 114.5, 109.2, 108.7, 105.9, 42.9, 31.1, 20.5, 13.9.

**HRMS (ESI):** Calc. for C<sub>16</sub>H<sub>17</sub>NO [M+H]<sup>+</sup> : 240.1388; Found: 240.1383.

**IR** ν<sub>max</sub> : 3272, 2945, 2873, 2365, 1622, 1468, 1350, 1178 cm<sup>-1</sup>.

**Physical Properties:** White solid (410 mg, 43 % yield, 1.71 mmol, m.p. 75 °C).

#### [9-hexyl-9H-carbazol-3-ol] (L14)

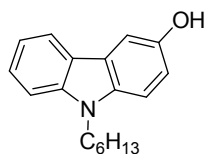

**<sup>1</sup>H-NMR (500 MHz, CDCl<sub>3</sub>):** δ 7.93(d, *J* = 7.55 Hz, 1H), 7.44(s, 1H), 7.38 – 7.34(m, 1H), 7.29(d, *J* = 8.25 Hz, 1H), 7.19(d, *J* = 8.25 Hz, 1H), 7.11 – 7.08(m, *J* = 1H), 6.95 – 6.93(m, 1H), 4.67(s, broad, 1H), 4.18(t, *J* = 7.2 Hz, 2H), 1.79 – 1.73(m, 2H), 1.32 – 1.22(m, 6H), 0.79(t, *J* = 6.85 Hz, 3H).

**<sup>13</sup>C-NMR (125 MHz, CDCl<sub>3</sub>):** δ 148.8, 141.0, 135.6, 125.7, 123.4, 122.2, 120.4, 118.2, 114.5, 109.2, 108.7, 105.9, 43.2, 31.6, 28.9, 26.9, 22.5, 13.9.

**HRMS (ESI):** Calc. for C<sub>18</sub>H<sub>21</sub>NO [M+H]<sup>+</sup> : 268.1701; Found: 268.1696.

**IR** ν<sub>max</sub> : 3307, 2918, 2861, 2365, 1604, 1460, 1232, 1178 cm<sup>-1</sup>.

**Physical Properties:** White solid (380 mg, 39.7 % yield, 1.42 mmol, m.p. 79 °C).

#### [9-octyl-9H-carbazol-3-ol] (L15)

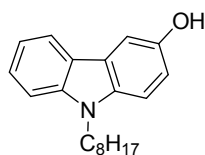

**<sup>1</sup>H-NMR (500 MHz, CDCl<sub>3</sub>):** δ 7.99(d, *J* = 8.2 Hz, 1H), 7.51(d, *J* = 2.75 Hz, 1H), 7.45 – 7.42(m, 1H), 7.36(d, *J* = 8.25 Hz, 1H), 7.26 – 7.24(m, 1H), 7.18 – 7.15(m, 1H), 7.03(dd, *J* = 8.95, 2.75 Hz, 1H), 4.24(t, *J* = 7.22 Hz, 2H), 1.84 – 1.79(m, 2H), 1.37 – 1.21(m, 10H), 0.87(t, *J* = 6.85 Hz, 3H).

**<sup>13</sup>C-NMR (125 MHz, CDCl<sub>3</sub>):** δ 148.7, 141.0, 135.6, 125.7, 123.3, 122.2, 120.4, 118.2, 114.5, 109.2, 108.7, 105.8, 41.39, 31.8, 29.3, 29.2, 28.9, 27.3, 22.6, 14.1.

**HRMS (ESI):** Calc. for C<sub>20</sub>H<sub>26</sub>NO [M+H]<sup>+</sup> : 296.2014; Found: 296.2009.

**IR** ν<sub>max</sub> : 3335, 2918, 2845, 2356, 1468, 1350, 1169 cm<sup>-1</sup>.

**Physical Properties:** White solid (395 mg, 41.14 % yield, 1.33 mmol, m.p. 77 °C).

#### [9-decyl-9H-carbazol-3-ol] (L16)

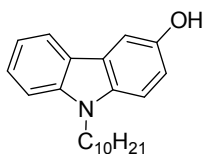

**<sup>1</sup>H-NMR (500 MHz, CDCl<sub>3</sub>):** δ 7.91(d, *J* = 7.55 Hz, 1H), 7.43(s, 1H), 7.37 – 7.33(m, 1H), 7.28(d, *J* = 8.25 Hz, 1H), 7.17 – 7.16(m, 1H), 7.1(t, *J* = 7.55 Hz, 1H), 6.94 – 6.92(m, 1H), 4.62(s, Broad, 1H), 4.16(t, *J* = 7.2 Hz, 2H), 1.77 – 1.71(m, 2H), 1.3 – 1.14(m, 15H), 0.8(t, *J* = 6.87 Hz, 3H).

**<sup>13</sup>C-NMR (125 MHz, CDCl<sub>3</sub>):** δ 148.7, 141.1, 135.6, 125.7, 123.4, 122.3, 120.4, 118.2, 114.5, 109.2, 108.7, 105.9, 43.2, 31.8, 29.5, 29.5, 29.4, 29.3, 27.3, 22.6, 14.1.

**HRMS (ESI):** Calc. for C<sub>22</sub>H<sub>30</sub>NO [M+H]<sup>+</sup> : 324.2327; Found: 324.2372.

**IR** ν<sub>max</sub> : 3334, 2927, 2855, 2362, 1612, 1468, 1350, 1169 cm<sup>-1</sup>.

**Physical Properties:** White solid (280 mg, 29 % yield, .86 mmol, m.p. 76 °C).

#### [9-octyl-9H-carbazol-6-yl acetate] (L17)

##### Procedure:

The phenol derivative (**L15**) (1 equiv) was dissolved in dry DCM under nitrogen atmosphere followed by addition of 1.5 equiv of trimethylamine and 5 equivs of acetic anhydride. The reaction mixture was left stirring for 12 h at room temperature. After completion of reaction as

judged by the TLC organic layer was washed with water and collected. Then the organic layer was removed under vacuum and the residue was purified by column chromatography.

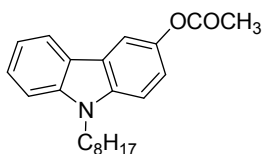

**<sup>1</sup>H-NMR (500 MHz, CDCl<sub>3</sub>):** δ 7.92(d, *J* = 7.55 Hz, 1H), 7.69(s, 1H), 7.35(t, *J* = 7.55 Hz, 1H), 7.26 – 7.21(m, 2H), 7.1 – 7.04(m, 2H), 4.11(t, *J* = 7.22 Hz, 2H), 2.23(s, 3H), 1.73 – 1.67(m, 2H), 1.29 – 1.12(m, 10H), .77(t, *J* = 6.9 Hz, 3H).

**<sup>13</sup>C-NMR (125 MHz, CDCl<sub>3</sub>):** δ 170.4, 143.4, 140.9, 138.1, 125.9, 122.9, 122.4, 120.5, 119.1, 118.7, 112.8, 108.8, 108.8, 40.1, 31.7, 29.6, 29.3, 28.9, 27.2, 22.5, 21.1, 14.0.

**HRMS (ESI):** Calc. for C<sub>22</sub>H<sub>27</sub>NO<sub>2</sub> [M+H]<sup>+</sup> : 338.2120; Found: 338.2080.

**IR** *v*<sub>max</sub> : 2927, 2863, 2356, 1767, 1477, 1214, 1160 cm<sup>-1</sup>.

**Physical Properties:** Yellow viscous liquid (450 mg, 51.4 % yield, 1.33 mmol).

### [3-methoxy-9-octyl-9H-carbazole] (L18)

Compound **L15** (1 equiv) was dissolved in propanol followed by addition of methyl iodide (1.2 equiv) and crushed sodium hydroxide (1 equiv) at 0 °C. Then the reaction mixture was refluxed at 85 °C for 8 h. With the completion of reaction, as judged by the TLC, DCM was added to the reaction mixture and the organic layer was extracted with water. The organic layer was dried over anhydrous sodium sulfate and removed under reduced pressure. The crude product was purified using column chromatography.

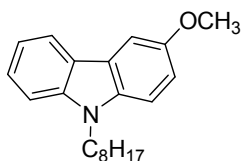

**<sup>1</sup>H-NMR (500 MHz, CDCl<sub>3</sub>):** δ 7.94(d, *J* = 8.25 Hz, 1H), 7.47(s, 1H), 7.33(t, *J* = 7.55 Hz, 1H), 7.24(d, *J* = 8.25 Hz, 1H), 7.16(d, *J* = 8.95 Hz, 1H), 7.08 – 7.05(m, 1H), 7.0 –

6.98(m, 1H), 4.1(t,  $J = 7.22$  Hz, 2H), 3.8(s, 3H), 1.72 – 1.66(m, 2H), 1.32 – 1.11(m, 10H), 0.76(t,  $J = 6.85$  Hz, 3H).

**$^{13}\text{C-NMR}$  (125 MHz,  $\text{CDCl}_3$ ):**  $\delta$  153.4, 140.8, 135.4, 125.5, 122.9, 122.5, 120.2, 118.1, 114.7, 109.3, 108.7, 103.2, 56.0, 43.0, 31.8, 29.3, 29.1, 28.9, 27.2, 22.6, 14.0.

**HRMS (ESI):** Calc. for  $\text{C}_{21}\text{H}_{27}\text{NO}$   $[\text{M}]^+$  : 309.2093; Found: 309.2132.

**IR  $\nu_{\text{max}}$**  : 2921, 2844, 2365, 1463, 1196  $\text{cm}^{-1}$ .

**Physical Properties:** Colorless viscous liquid (300 mg, 31.42 % yield, 0.96 mmol).

### Procedure for the synthesis of 23:

Phenylhydrazine (1 equiv) was added portion wise for 30 minutes to a boiling solution of 4-methylcyclohexonone (1 equiv) in glacial acetic acid, and resulting mixture was refluxed for 3 h. Then the reaction mixture was cooled to 0 °C using ice bath which resulted in the formation of white solid as precipitate. The solid was washed with cold water several times and dissolved in DCM. The DCM solution was dried over anhydrous sodium sulphate, and the volatiles were removed under vacuum. The crude was purified using column chromatography.

### [2,3,4,9-tetrahydro-3-methyl-1H-carbazole] (23)

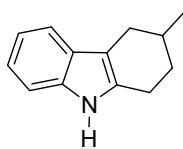

**$^1\text{H-NMR}$  (500 MHz,  $\text{CDCl}_3$ ):**  $\delta$  7.42(s, 1H), 7.37(d,  $J = 7.55$  Hz, 1H), 7.12 – 7.1(m, 1H), 7.03 – 6.97(m, 2H), 2.76 – 2.72(m, 1H), 2.2 – 2.15(m, 1H), 1.873 – 1.81(m, 2H), 1.5 – 1.42(m, 1H), 1.05(d,  $J = 6.2$  Hz, 3H).

**$^{13}\text{C-NMR}$  (125 MHz,  $\text{CDCl}_3$ ):**  $\delta$  135.8, 133.8, 127.6, 120.8, 118.9, 117.6, 110.3, 109.9, 31.3, 29.6, 29.3, 22.8, 21.7.

**HRMS (ESI):** Calc. for  $\text{C}_{13}\text{H}_{15}\text{N}$   $[\text{M}+\text{H}]^+$  : 186.1283; Found: 186.1278.

**IR  $\nu_{\text{max}}$**  : 3388, 2935, 2864, 2362, 1603, 1460  $\text{cm}^{-1}$ .

**Physical Properties:** White solid (1.4 gm., 84.8 % yield, 7.55 mmol, m.p. 98 °C).

**Procedure for the synthesis of 26:**

Compound **L23** (4.3 mmol) was heated at 290 °C with 10 % Pd/C (100 mg) for 45 min under nitrogen atmosphere. Then the reaction mixture was cooled to room temperature and extracted with boiling ethanol/water mixture (95:5). The resulting crude mixture was filtered through sintered funnel and the filtrate was dried in rotavapor. The crude was purified using column chromatography.

**[3-methyl-9H-carbazole] (26)**

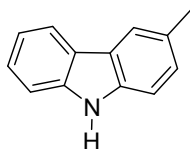

**<sup>1</sup>H-NMR (500 MHz, CD<sub>3</sub>OD):** δ 11.09(s, 1H), 8.05(d, *J* = 7.55 Hz, 1H), 7.88(s, 1H), 7.45(d, *J* = 7.55 Hz, 1H), 7.37 – 7.33(m, 2H), 7.2(dd, *J* = 8.25, 1.35 Hz, 1H), 7.12 – 7.09(m, 1H), 2.45(s, 3H).

**<sup>13</sup>C-NMR (125 MHz, CD<sub>3</sub>OD):** δ 140.0, 138.0, 127.2, 126.9, 125.4, 122.6, 122.3, 120.1, 119.9, 118.3, 110.9, 110.7, 21.2.

**HRMS (ESI):** Calc. for C<sub>13</sub>H<sub>11</sub>N [M+H]<sup>+</sup>: 182.097; Found: 182.1011.

**IR**  $\nu_{\max}$ : 3406, 3044, 2918, 2347, 1603, 1460, 1341 cm<sup>-1</sup>.

**Physical Properties:** White solid (630 mg, 80.66 % yield, 3.47 mmol, m.p. 206 °C).

**[3-methyl-9-octyl-9H-carbazole] (30)**

Compound **L26** (1 equiv) was added slowly to a solution of KOH (3.77 equiv) in acetone at 0 °C and the mixture was left stirring for 30 minutes at room temperature. 1-Bromooctane (1.5 equiv) in acetone was then added drop wise and stirred for 12 hours at room temperature. The progress of the reaction was monitored by TLC. After completion of reaction, the organic solvent was

removed under vacuum and the crude mixture was extracted with DCM. The organic layer was dried over magnesium sulfate and the volatiles were removed under vacuum. The crude product was collected and purified using column chromatography.

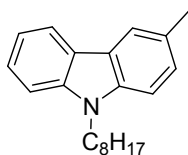

**<sup>1</sup>H-NMR (500 MHz, CDCl<sub>3</sub>):** δ 7.95(d, *J* = 7.55 Hz, 1H), 7.78(s, 1H), 7.33 – 7.29(m, 1H), 7.24(d, *J* = 8.25 Hz, 1H), 7.15(s, 2H), 7.09(t, *J* = 6.87 Hz, 1H), 4.11(t, *J* = 7.22 Hz, 2H), 2.42(s, 3H), 1.71 – 1.67(m, 2H), 1.24 – 1.11(m, 10H), 0.77(t, *J* = 6.85 Hz, 3H).

**<sup>13</sup>C-NMR (125 MHz, CDCl<sub>3</sub>):** δ 140.6, 138.7, 127.9, 126.8, 125.3, 122.9, 122.6, 120.24, 120.2, 183.3, 108.5, 108.3, 42.9, 31.8, 29.4, 29.2, 28.9, 27.3, 22.6, 21.4, 14.1.

**HRMS (ESI):** Calc. for C<sub>21</sub>H<sub>28</sub>N [M+H]<sup>+</sup>: 294.2222; Found: 294.2246.

**IR**  $\nu_{\text{max}}$ : 2918, 2885, 2356, 1520, 1465, 1350 cm<sup>-1</sup>.

**Physical Properties:** Colorless viscous liquid (1.06 gm., 66.1% yield, 3.61 mmol).

#### **Procedure for the synthesis of 24 :**

Compound **24** was synthesized following the same procedure as that of **23**.

#### **[3-tert-butyl-2, 3, 4, 9-tetrahydro-9-octyl-1H-carbazole] (24)**

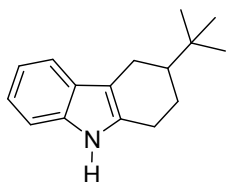

**<sup>1</sup>H-NMR (500 MHz, CDCl<sub>3</sub>):** δ 7.45(s, Broad, 1H), 7.39(d, *J* = 7.55 Hz, 1H), 7.14 – 7.12(m, 1H), 7.03 – 6.97(m, 2H), 2.75 – 2.72(m, 1H), 2.63 – 2.6(m, 2H), 2.33 – 2.28(m, 1H), 2.01 – 1.98(m, 1H), 1.48 – 1.39(m, 2H), 0.91(s, 9H).

**<sup>13</sup>C-NMR (125 MHz, CDCl<sub>3</sub>):** δ 136.0, 134.1, 127.9, 120.9, 119, 117.6, 110.5, 110.4, 45.4, 32.6, 27.5, 24.7, 24.1, 22.2.

**HRMS (ESI):** Calc. for C<sub>16</sub>H<sub>21</sub>N [M+H]<sup>+</sup> : 228.1752; Found: 228.1932.

**IR**  $\nu_{\max}$  : 3407, 2963, 2909, 2365, 1450, 1321 cm<sup>-1</sup>.

**Physical Properties:** White solid (1.21 gm., 81.24 % yield, 5.27 mmol, m.p. 130 °C).

**Procedure for the synthesis of 27:**

Compound **24** was synthesized following the same procedure as that of **23**.

**[3-tert-butyl-9H-carbazole] (27)**

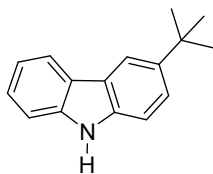

**<sup>1</sup>H-NMR (500 MHz, CDCl<sub>3</sub>):**  $\delta$  8.13 – 8.12(d, 2H), 7.83(s, 1H), 7.53(dd,  $J$  = 8.25, 2.05 Hz, 1H), 7.43 – 7.4(m, 1H), 7.36 – 7.31(m, 1H), 7.27 – 7.24(m, 1H), 1.48(s, 9H).

**<sup>13</sup>C-NMR (125 MHz, CDCl<sub>3</sub>):**  $\delta$  142.4, 139.8, 137.5, 125.5, 123.8, 123.5, 122.9, 120.1, 119.1, 116.3, 110.5, 110.1, 34.6, 31.9.

**HRMS (ESI):** Calc. for C<sub>16</sub>H<sub>17</sub>N[M+H]<sup>+</sup> : 224.1439; Found: 224.1517.

**IR**  $\nu_{\max}$  : 3416, 2963, 2872, 2365, 1603, 1460, 1241 cm<sup>-1</sup>.

**Physical Properties:** White solid (580 mg, 78.88 % yield, 2.59 mmol, m.p. 152 °C).

**[3-tert-butyl-9-octyl-9H-carbazole] (31)**

**L31** was synthesized following the same procedure as that of **L30**.

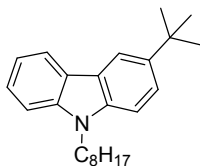

**<sup>1</sup>H-NMR (500 MHz, CDCl<sub>3</sub>):**  $\delta$  8.01 – 7.99(m, 2H), 7.48 – 7.41(m, 1H), 7.33 – 7.3(m, 1H), 7.25 – 7.19(m, 2H), 7.1 – 7.08(m, 1H), 4.13(t,  $J$  = 7.2 Hz, 2H), 1.73 – 1.7(m, 2H), 1.35(s, 9H), 1.17 – 1.13(m, 10H), .77(t,  $J$  = 6.85 Hz, 3H).

**<sup>13</sup>C-NMR (125 MHz, CDCl<sub>3</sub>):** δ 141.6, 140.7, 138.6, 125.2, 123.5, 122.9, 122.4, 120.1, 118.4, 116.4, 108.5, 108.1, 43.0, 34.6, 32.0, 31.8, 29.4, 29.2, 29, 27.3, 22.6, 14.1.

**HRMS (ESI):** Calc. for C<sub>24</sub>H<sub>33</sub>N [M+H]<sup>+</sup> : 336.2691; Found:336.2721.

**IR** ν<sub>max</sub> : 2927, 2844, 2356, 1486, 1359, 1269 cm<sup>-1</sup>.

**Physical Properties:** Colorless viscous liquid (960 mg, 64 % yield, 2.86 mmol).

**Procedure for the synthesis of 25:**

**L25** was synthesized following the same procedure as that of **L24**, and using 4-methoxyphenylhydrazine instead of phenylhydrazine.

**[6,7,8,9-tetrahydro-3-methoxy-5H-carbazole] (25)**

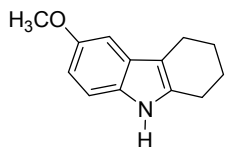

**<sup>1</sup>H-NMR (500 MHz, CDCl<sub>3</sub>):** δ 7.45(s, Broad, 1H), 7.05(d, *J* = 8.95 Hz, 1H), 6.84(s, 1H), 6.69 – 6.67(m, 1H), 3.7723(s, 3H), 2.61 – 2.57(m, 4H), 1.82 – 1.54(m, 4H).

**<sup>13</sup>C-NMR (125 MHz, CDCl<sub>3</sub>):** δ 153.8, 135.1, 130.6, 128.1, 110.9, 110.4, 109.9, 100.2, 55.9, 23.3, 23.1, 20.9.

**HRMS (ESI):** Calc. for C<sub>13</sub>H<sub>15</sub>NO [M+H]<sup>+</sup> : 202.1232; Found: 202.1254.

**IR** ν<sub>max</sub> : 3302, 2915, 2844, 2353, 1586, 1434, 1483, 1212 cm<sup>-1</sup>.

**Physical Properties:** White solid (1.2 gm., 58.5 % yield, 5.96 mmol, m.p. 96 °C).

**Procedure for the synthesis of 28:**

**28** was synthesized following the same procedure as that of **27**.

**[3-methoxy-9H-carbazole] (28)**



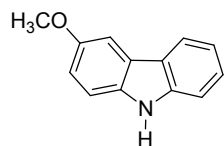

**<sup>1</sup>H-NMR (500 MHz, CDCl<sub>3</sub>):** δ 8.08 – 8.02(m, 1H), 7.9(s, Broad, 1H), 7.55(d, *J* = 2.1 Hz, 1H), 7.42 – 7.38(m, 2H), 7.32(d, *J* = 8.9 Hz, 1H), 7.24 – 7.19(m, 1H), 7.07 – 7.05(m, 1H), 3.92(s, 3H).

**<sup>13</sup>C-NMR (125 MHz, CDCl<sub>3</sub>):** δ 153.8, 140.2, 134.3, 125.8, 123.7, 123.3, 120.2, 119.0, 115.0, 111.3, 110.7, 103.1, 56.0.

**HRMS (ESI):** Calc. for C<sub>13</sub>H<sub>11</sub>NO [M+H]<sup>+</sup> : 198.0919; Found: 198.1035.

**IR**  $\nu_{\max}$  : 3396, 3051, 2370, 2998, 2848, 1583, 1452, 1177 cm<sup>-1</sup>.

**Physical Properties:** White solid (440 mg, 56.1 % yield, 2.23 mmol, m.p. 144 °C).

### [9H-carbazol-3-ol] (L29)

#### Procedure:

Compound **L28** (2 mmol) was dissolved in HBr (4 mL) and glacial acetic acid (10 mL) under inert atmosphere, and the resulting mixture was refluxed for 5 h. After the completion of reaction, as judged by the TLC, a solid product precipitated out. The solid product was collected and washed with water. The crude solid was dissolved in DCM and dried over sodium sulfate. The organic layer was removed under vacuum and the residue was purified using column chromatography.

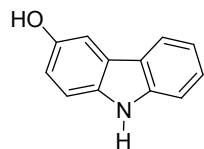

**<sup>1</sup>H-NMR (500 MHz, CDCl<sub>3</sub>):** 7.92(d, *J* = 5.05 Hz, 1H), 7.43(d, *J* = 2.05 Hz, 1H), 7.36(d, *J* = 8.2 Hz, 1H), 7.31 – 7.24(m, 2H), 7.07 – 7.04(m, 1H), 6.92 – 6.9(m, 1H).

**<sup>13</sup>C-NMR (125 MHz, CDCl<sub>3</sub>):** δ 151.3, 142.3, 135.9, 126.5, 125, 124.2, 120.9, 119.1, 115.8, 112.2, 111.7, 105.9.

**HRMS (ESI):** Calc. for C<sub>12</sub>H<sub>9</sub>NO [M+H]<sup>+</sup>: 184.0762; Found: 184.0758.

**IR**  $\nu_{\text{max}}$ : 3395, 3063, 1587, 1450, 1178 cm<sup>-1</sup>.

**Physical Properties:** White solid (135 mg, 36.38 % yield, .73 mmol, m.p. 263 °C).

**NMR Spectra of Compounds:**

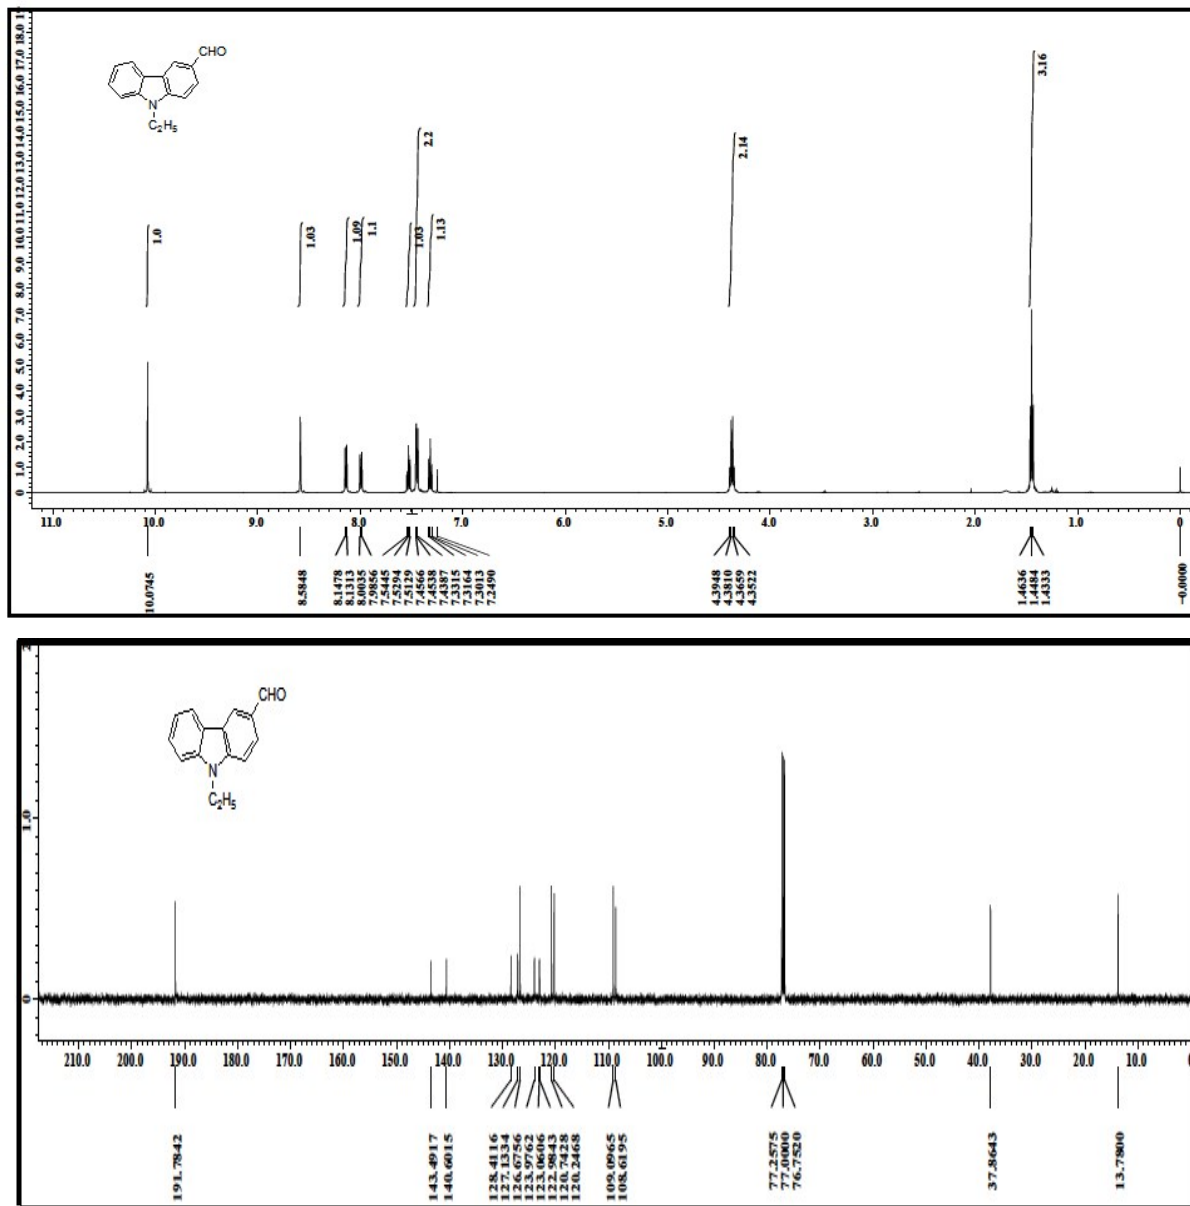

Fig. S35 <sup>1</sup>H and <sup>13</sup>C spectra of 6.

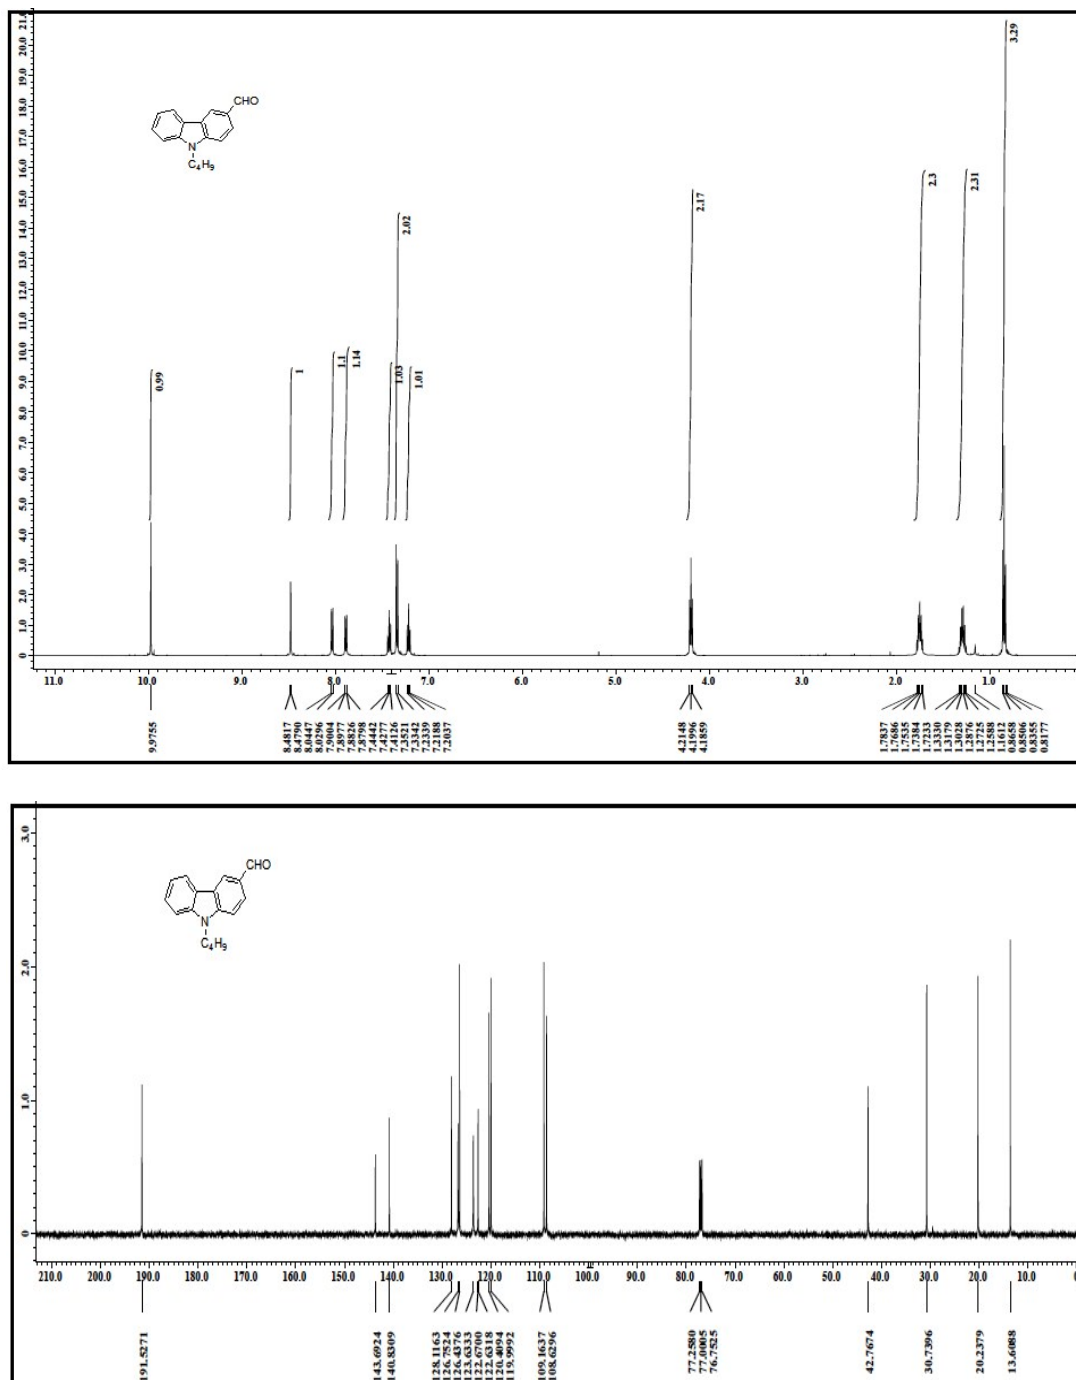

Fig. S36 <sup>1</sup>H and <sup>13</sup>C spectra of 7.

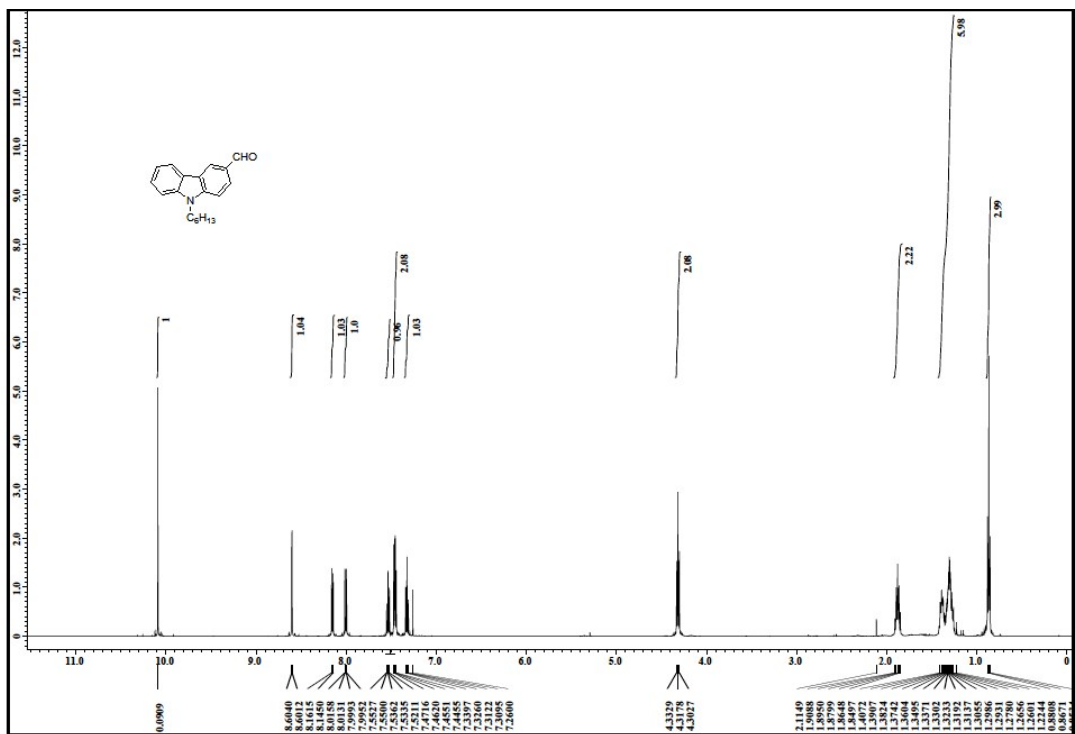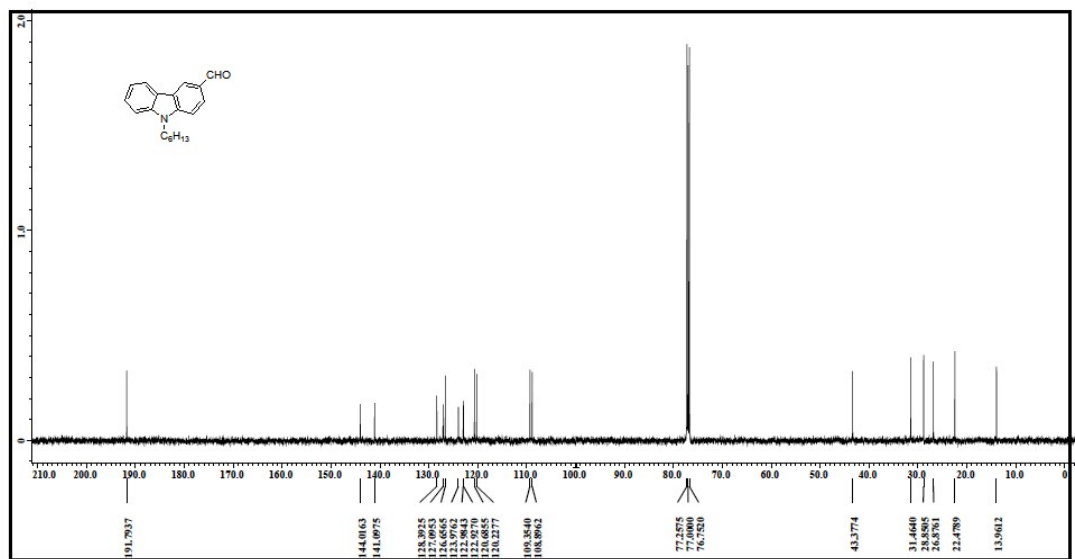

Fig. S37 <sup>1</sup>H and <sup>13</sup>C spectra of 8.

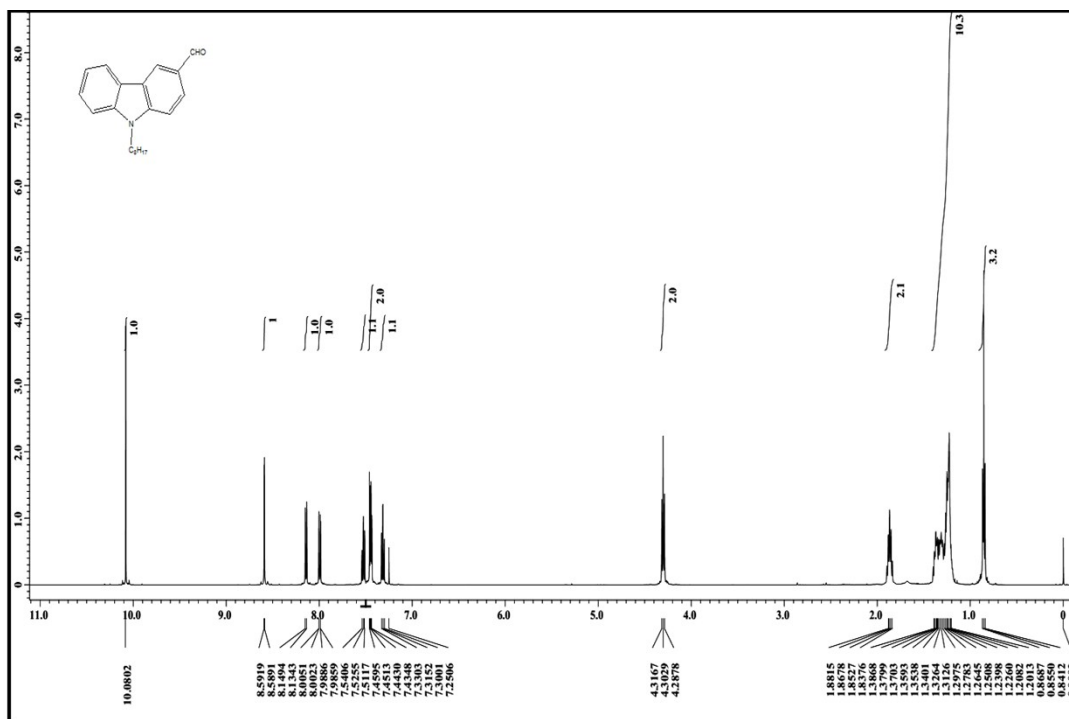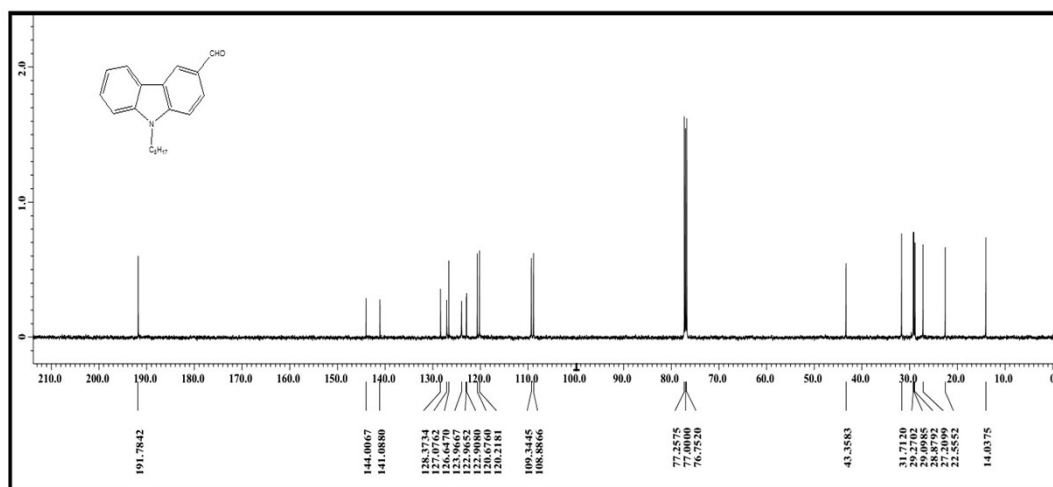

Fig. S38  $^1\text{H}$  and  $^{13}\text{C}$  spectra of 9.

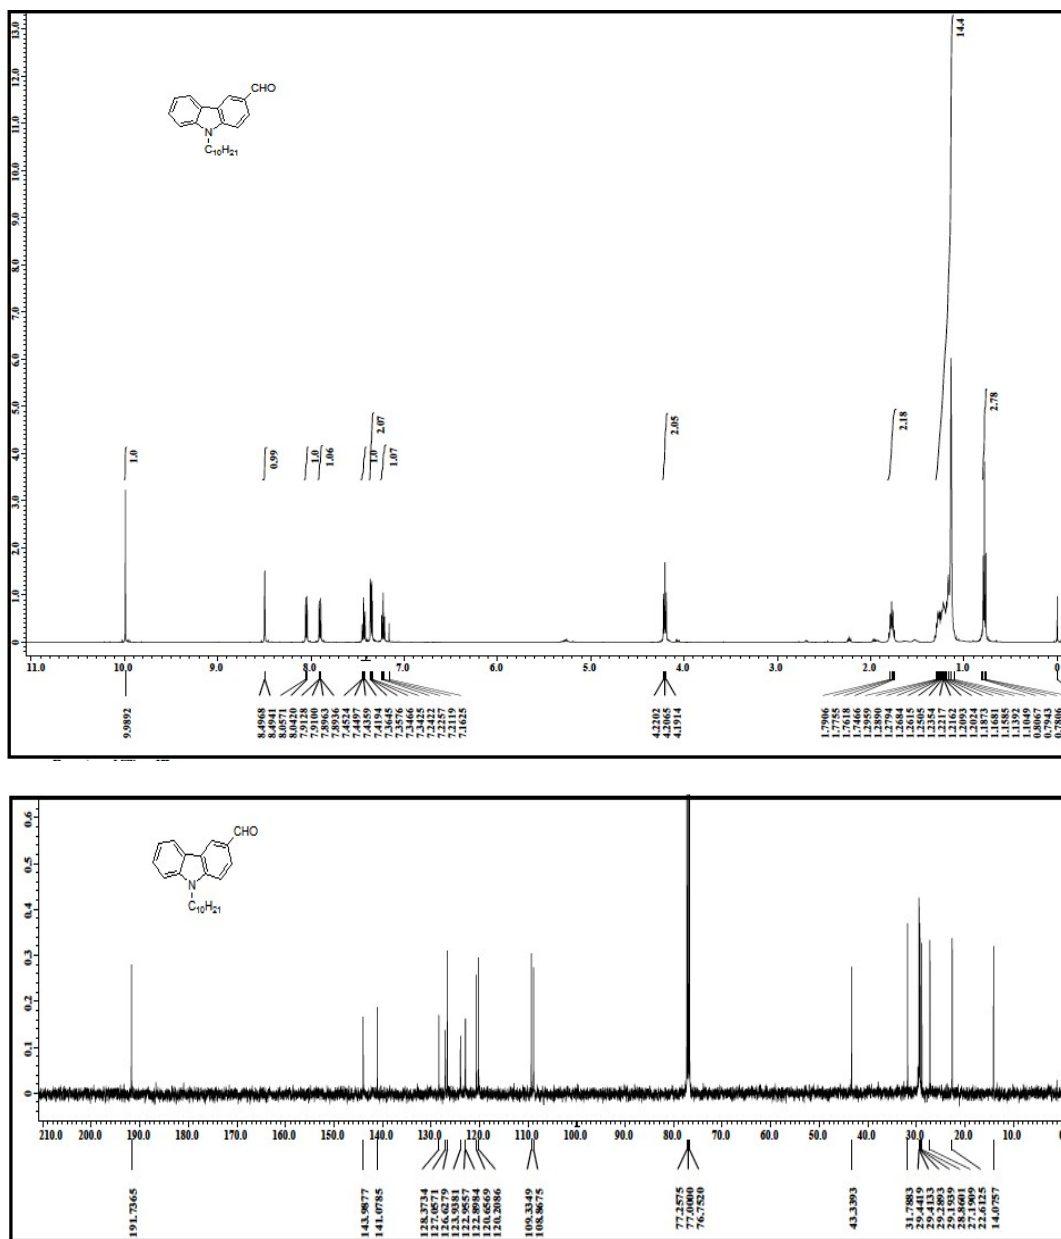

Fig. S39 <sup>1</sup>H and <sup>13</sup>C spectra of 10.

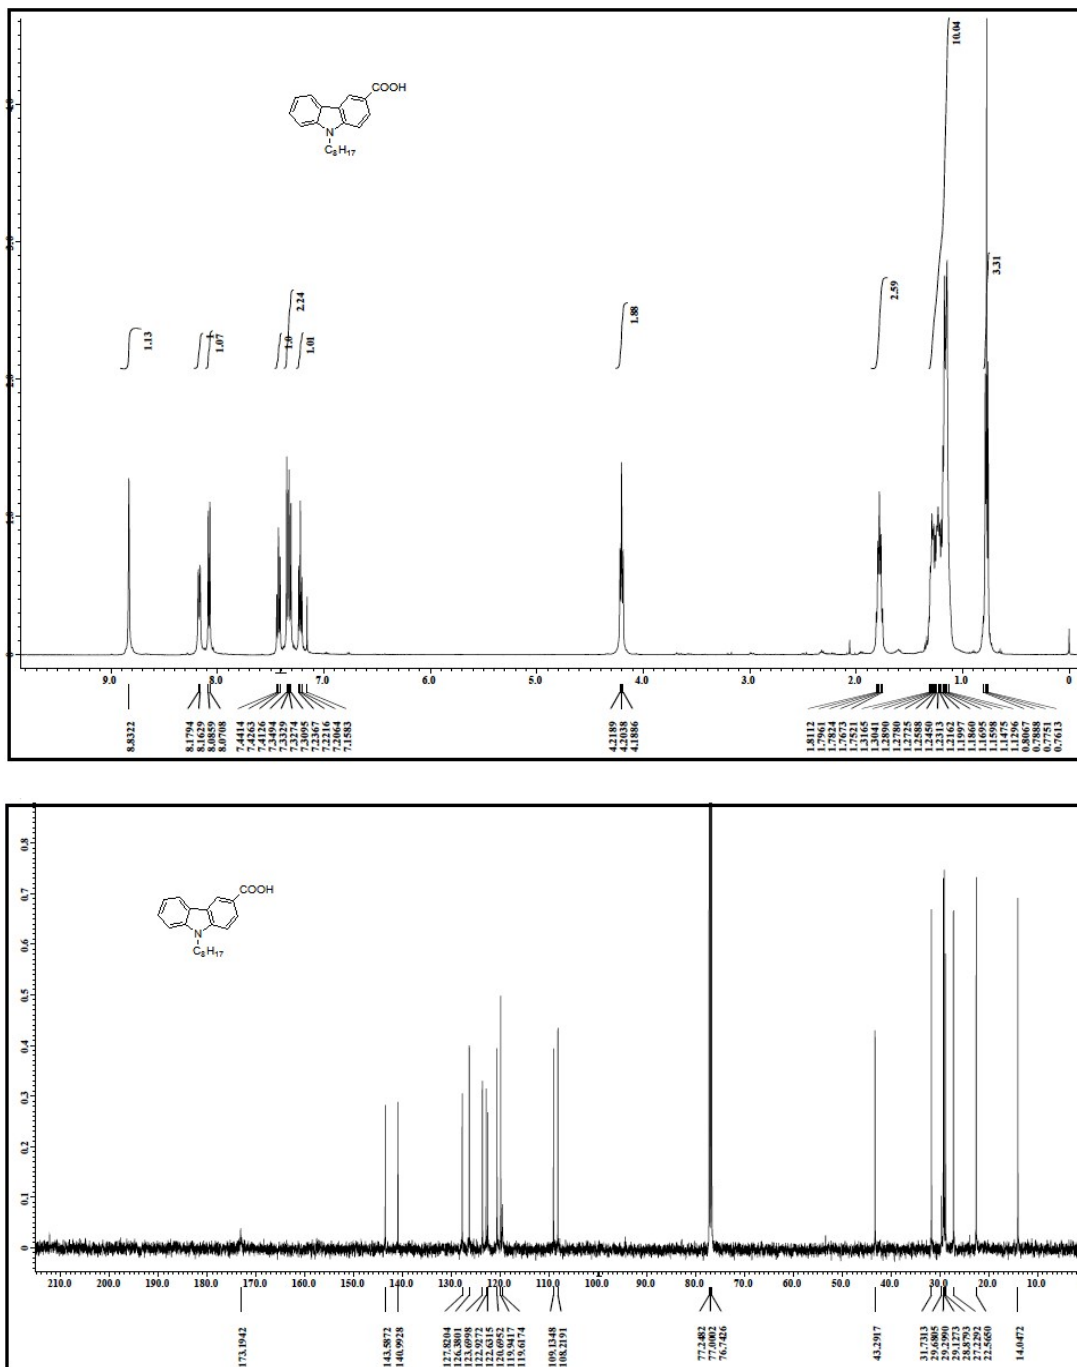

Fig. S40 <sup>1</sup>H and <sup>13</sup>C spectra of L11.



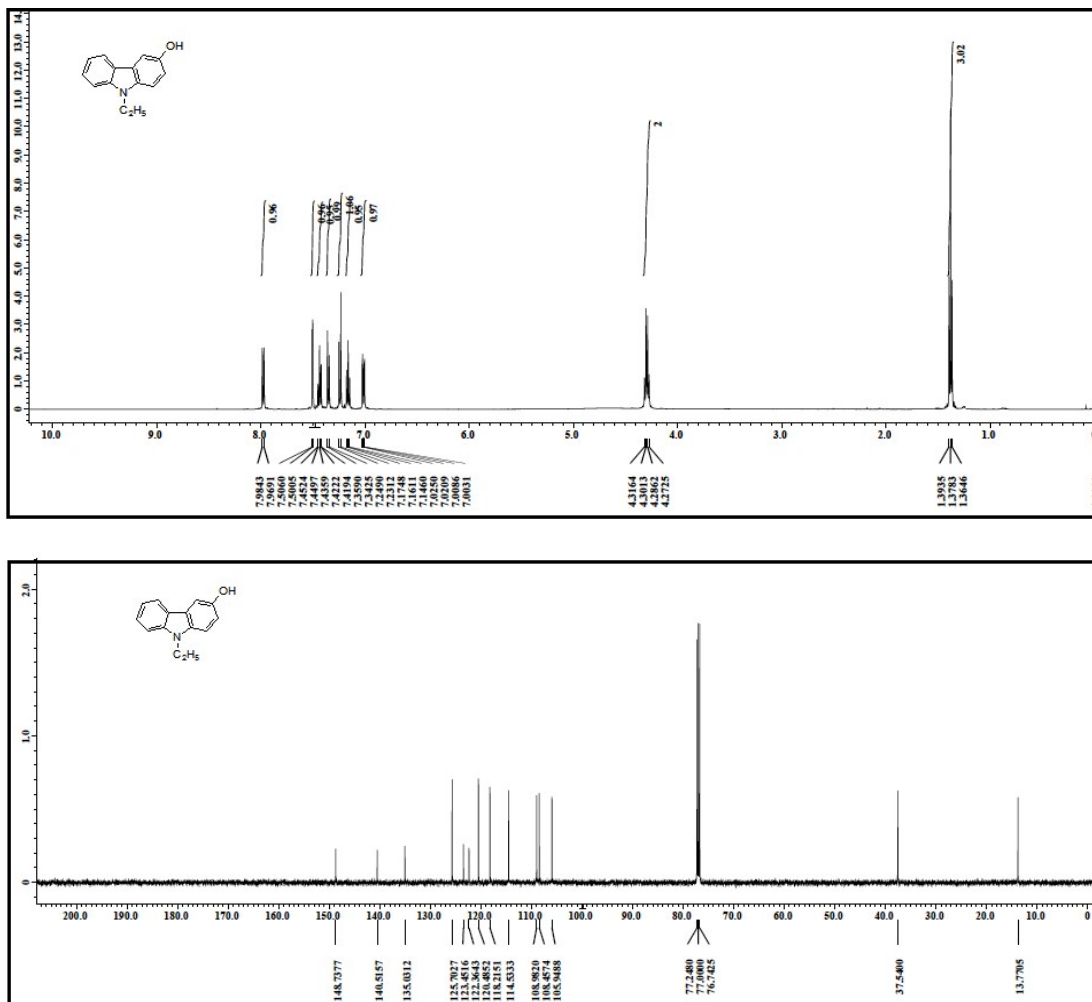

Fig. S41 <sup>1</sup>H and <sup>13</sup>C spectra of L12.

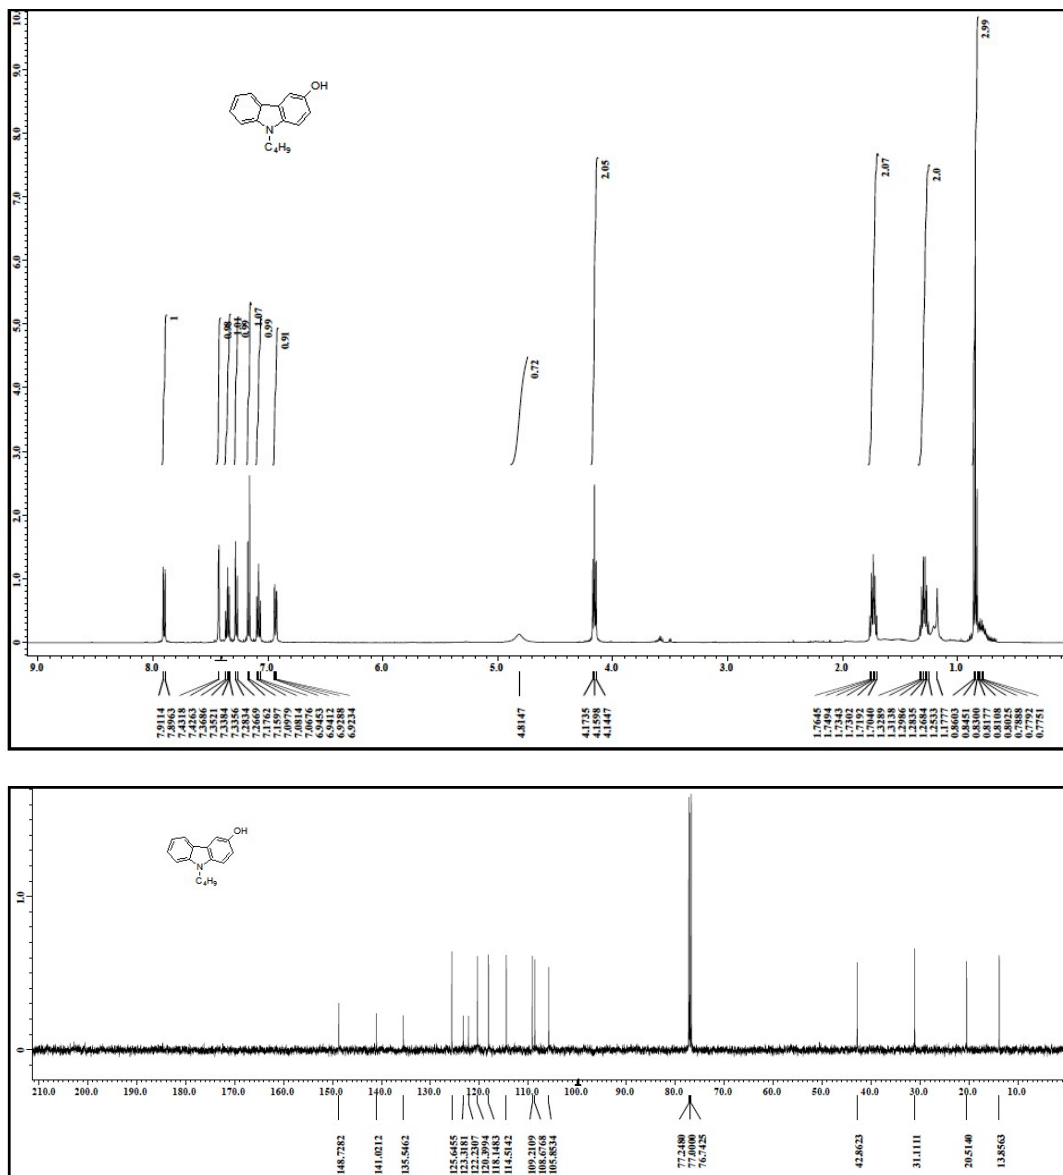

Fig. S42 <sup>1</sup>H and <sup>13</sup>C spectra of L13.

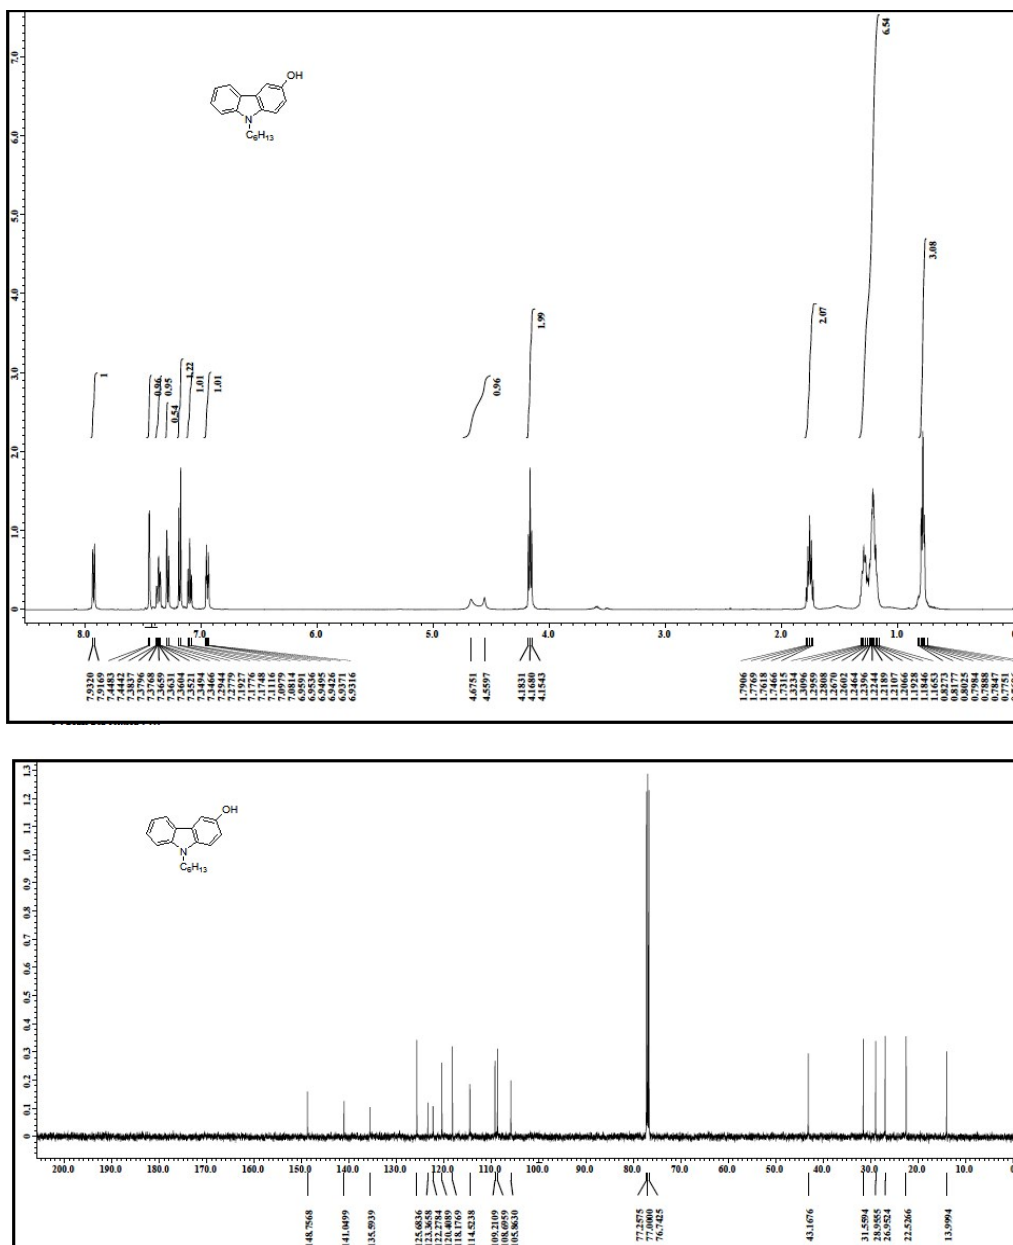

Fig. S43 <sup>1</sup>H and <sup>13</sup>C spectra of L14.

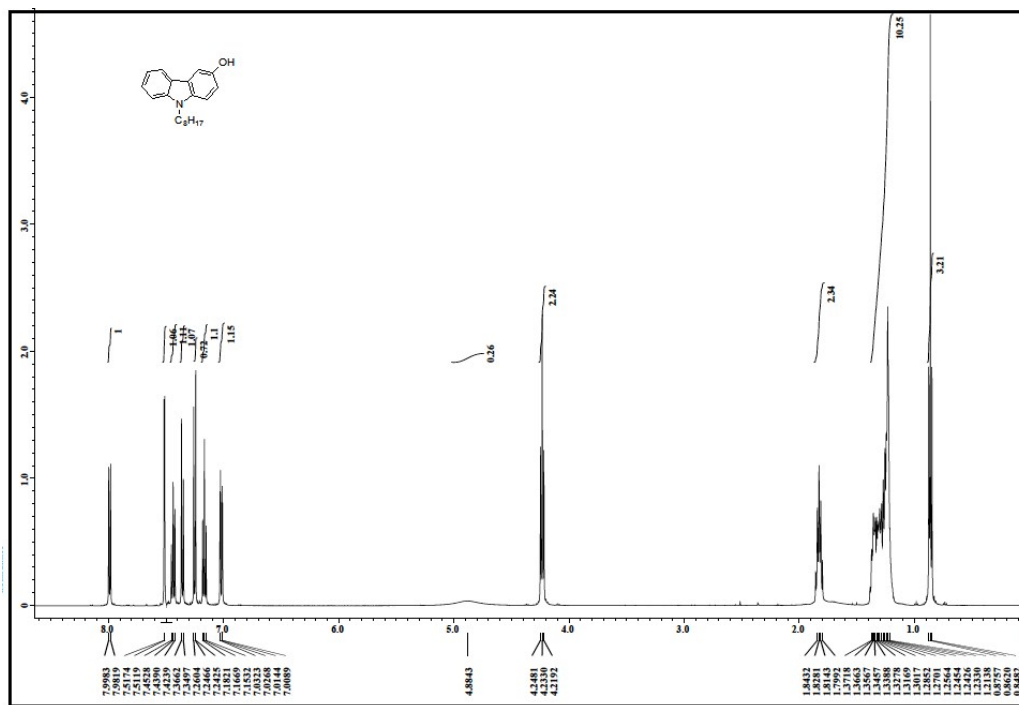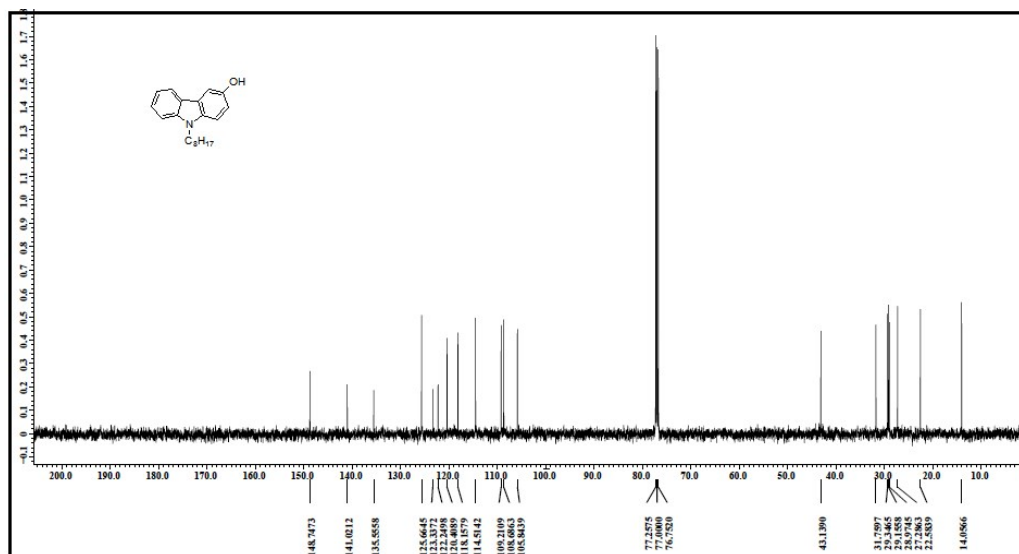

Fig. S44  $^1\text{H}$  and  $^{13}\text{C}$  spectra of L15.

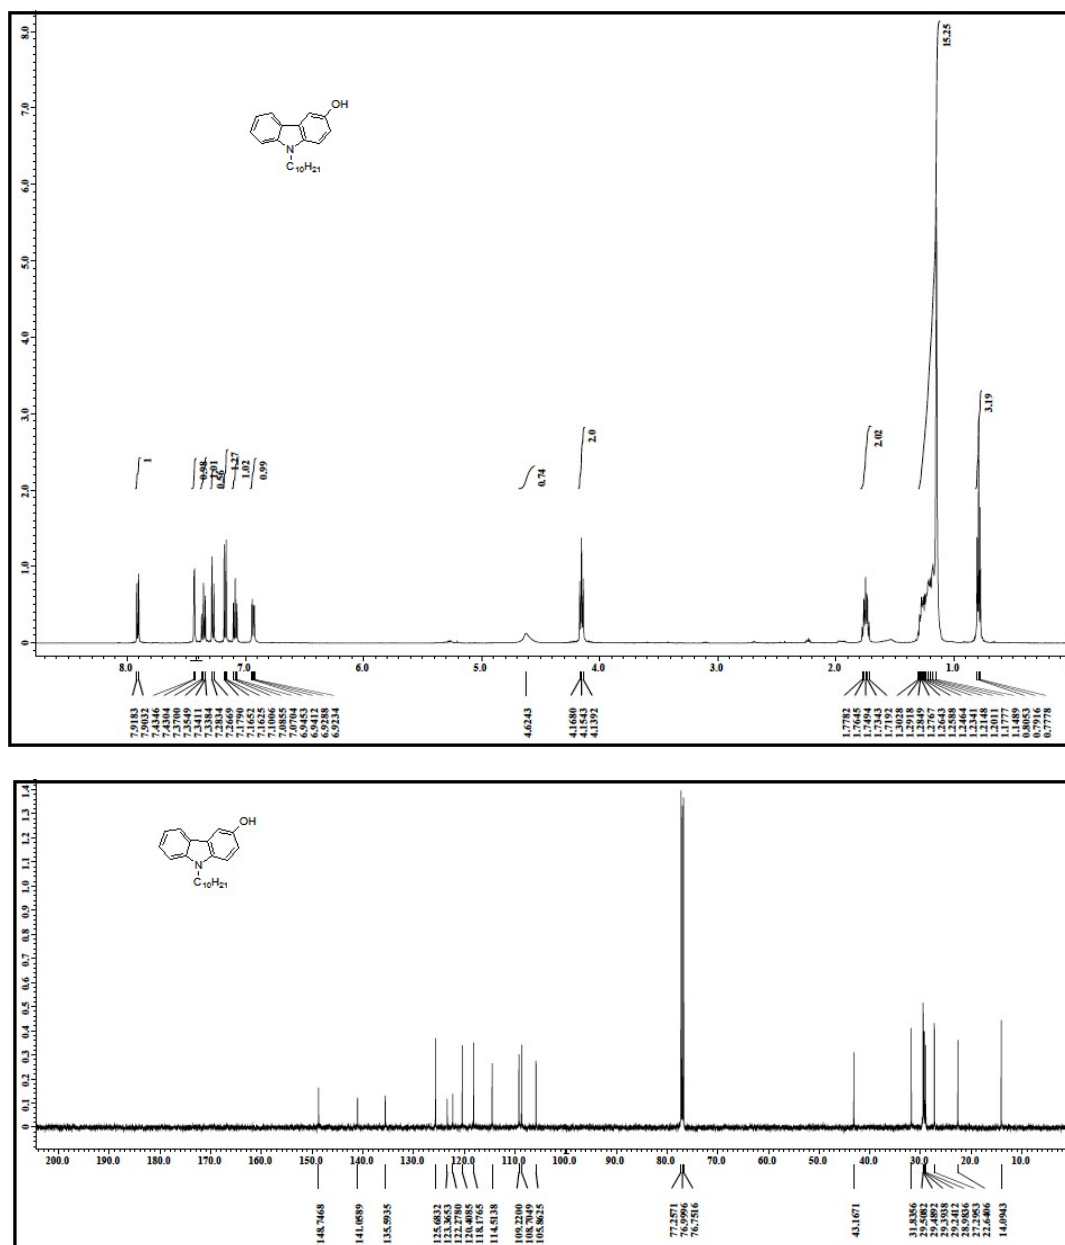

Fig. S45 <sup>1</sup>H and <sup>13</sup>C spectra of L16.

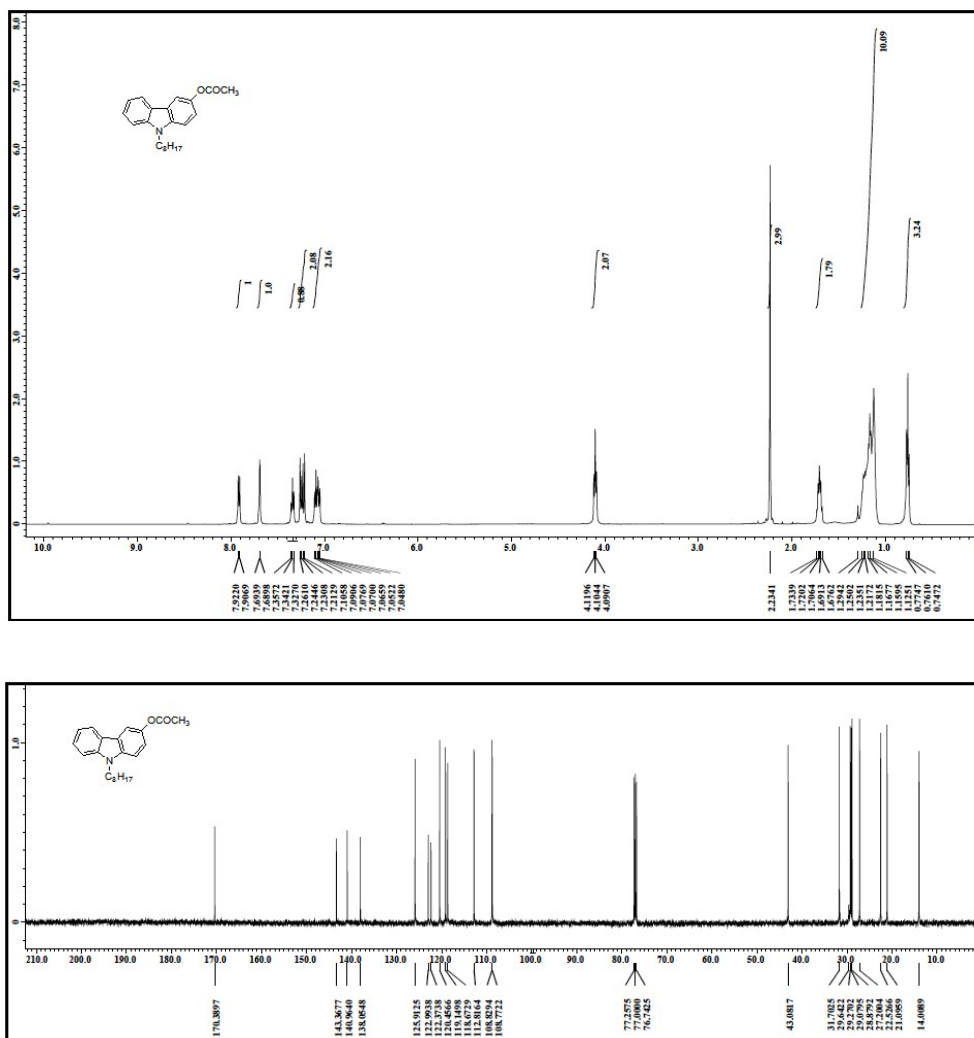

Fig. S46  $^1H$  and  $^{13}C$  spectra of L17.

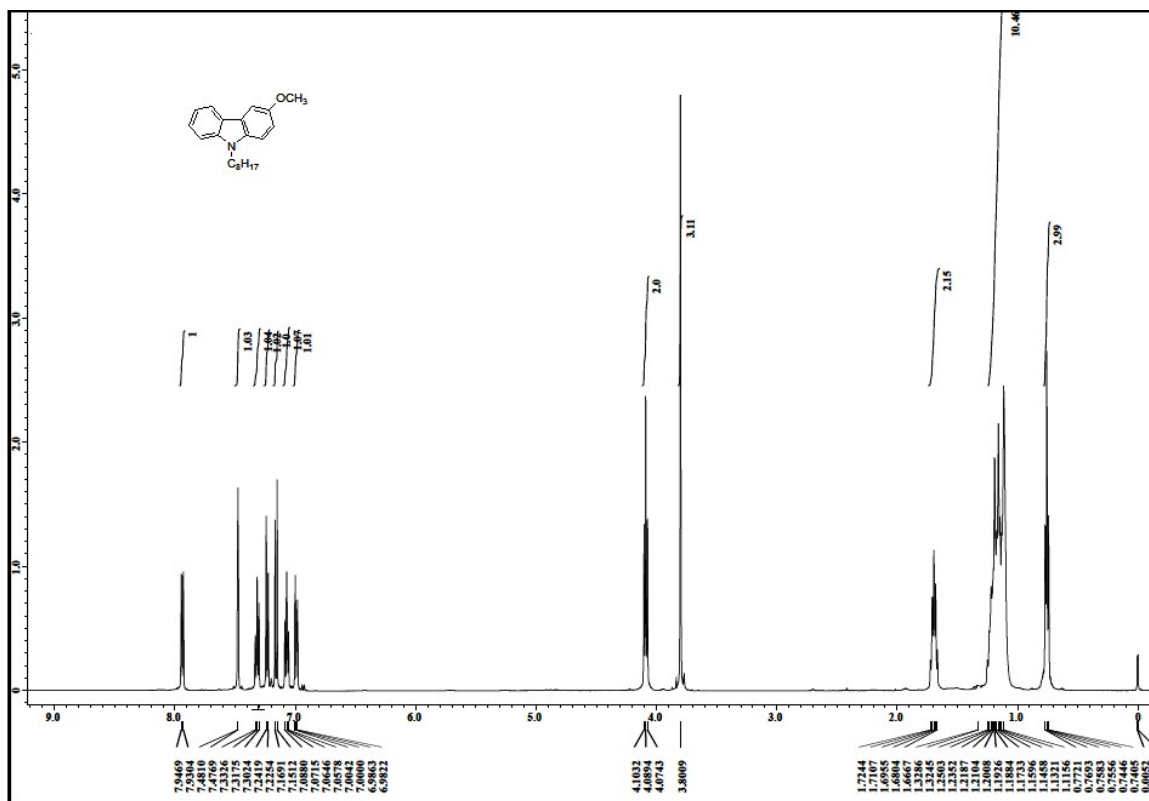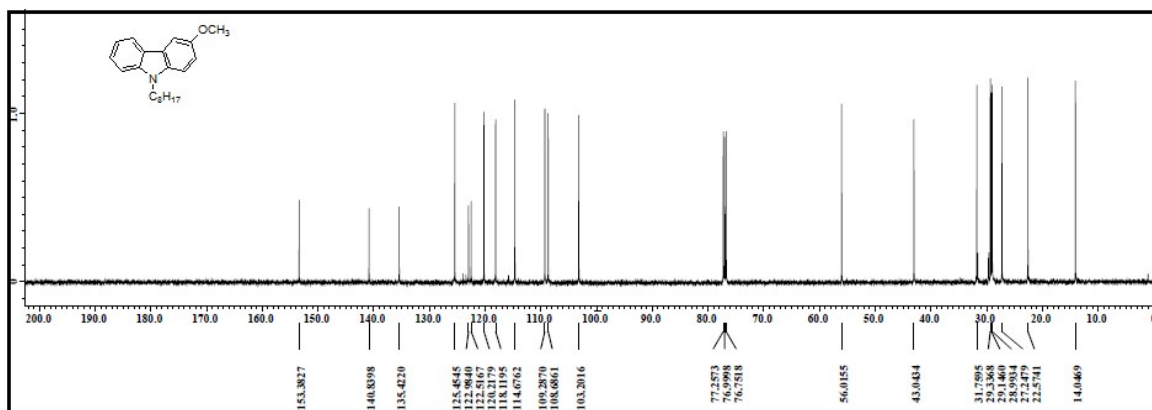

Fig. S47  $^1\text{H}$  and  $^{13}\text{C}$  spectra of L18.

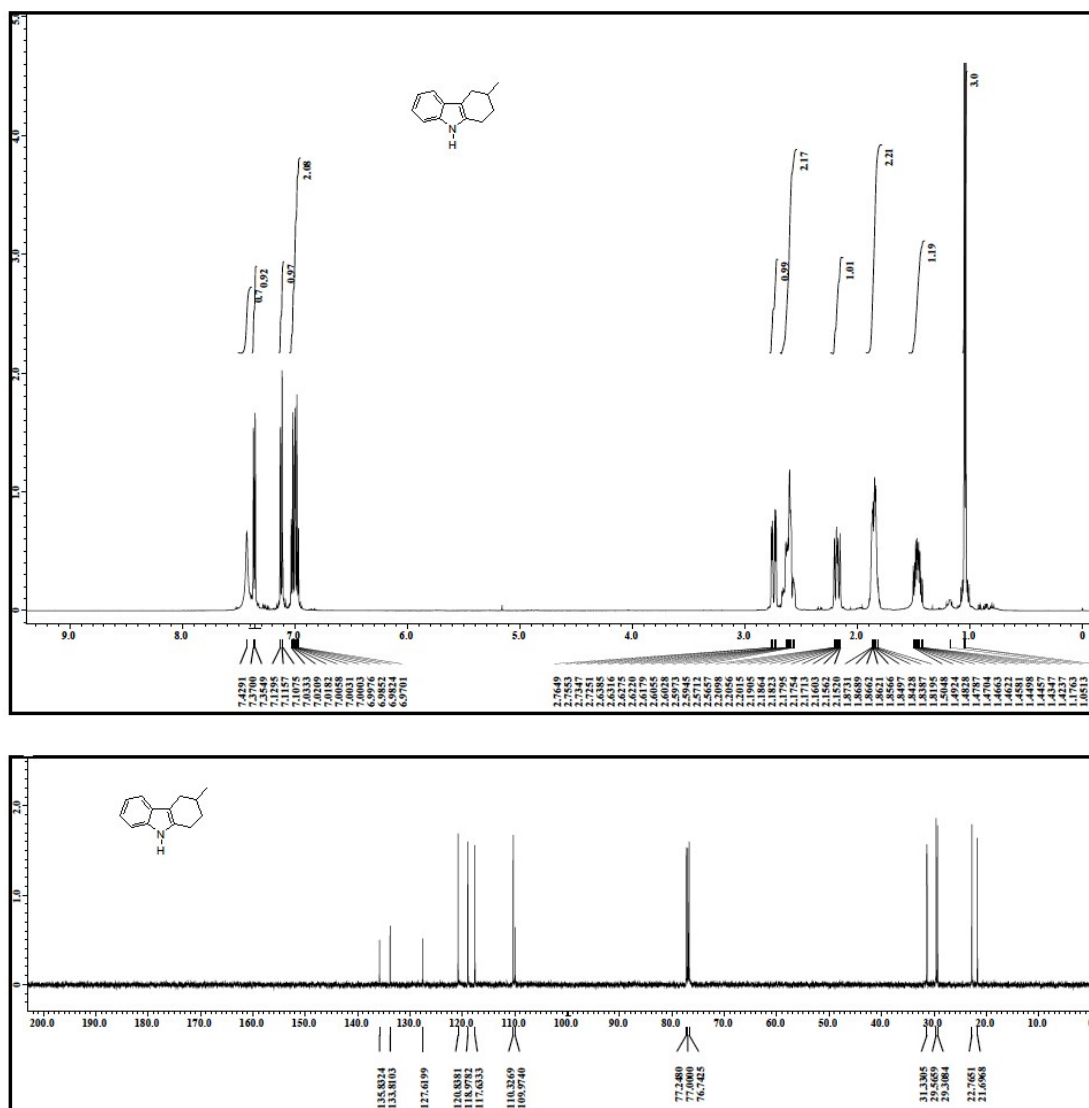

Fig. S48 <sup>1</sup>H and <sup>13</sup>C spectra of 23.



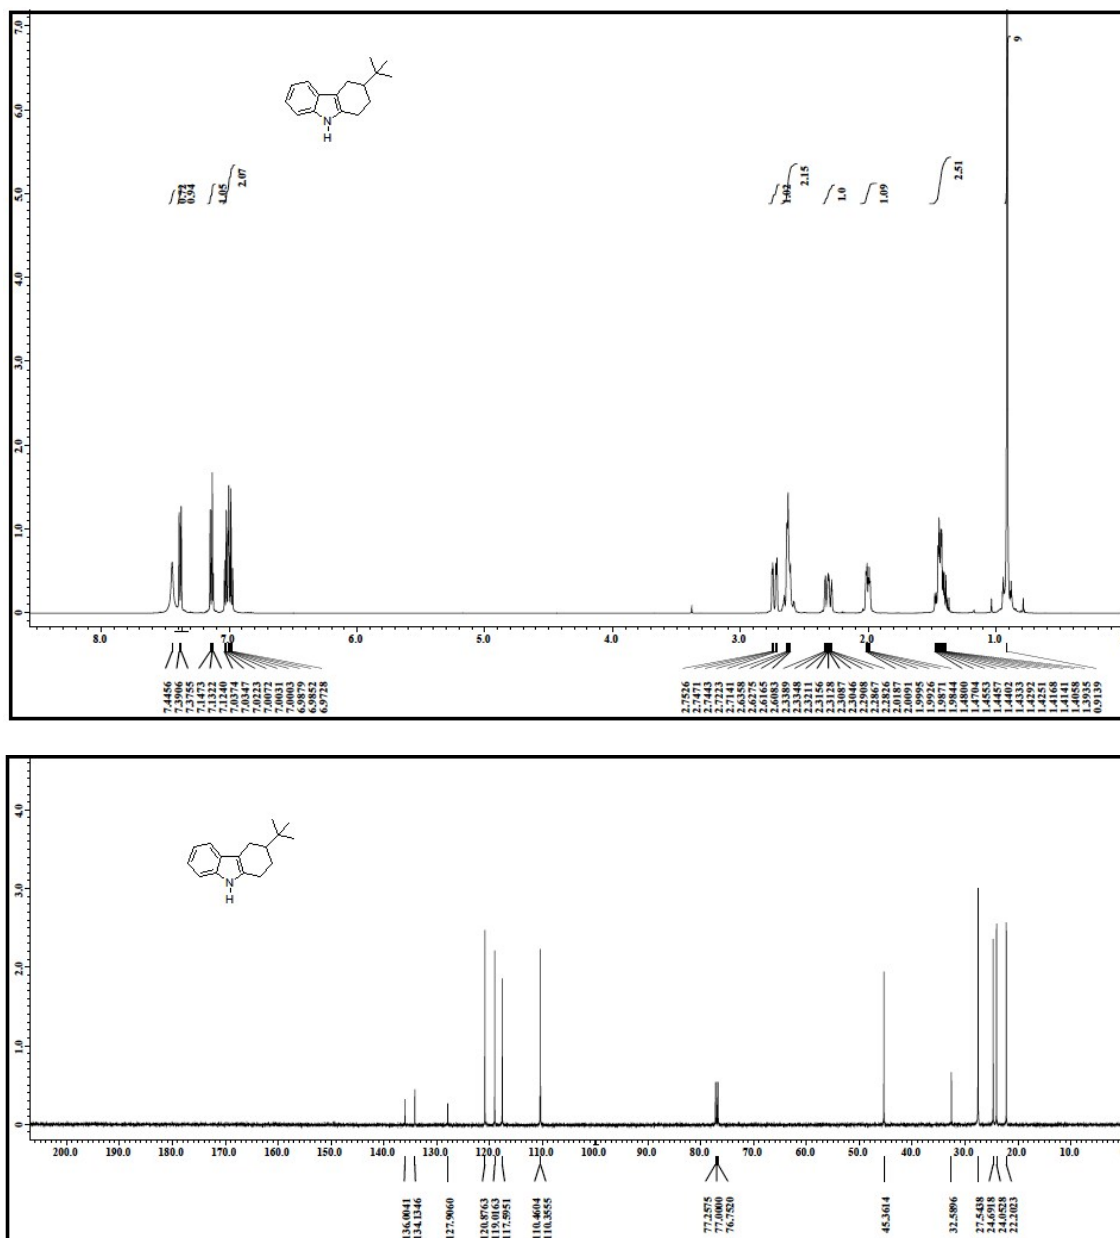

Fig. S49 <sup>1</sup>H and <sup>13</sup>C spectra of 24.

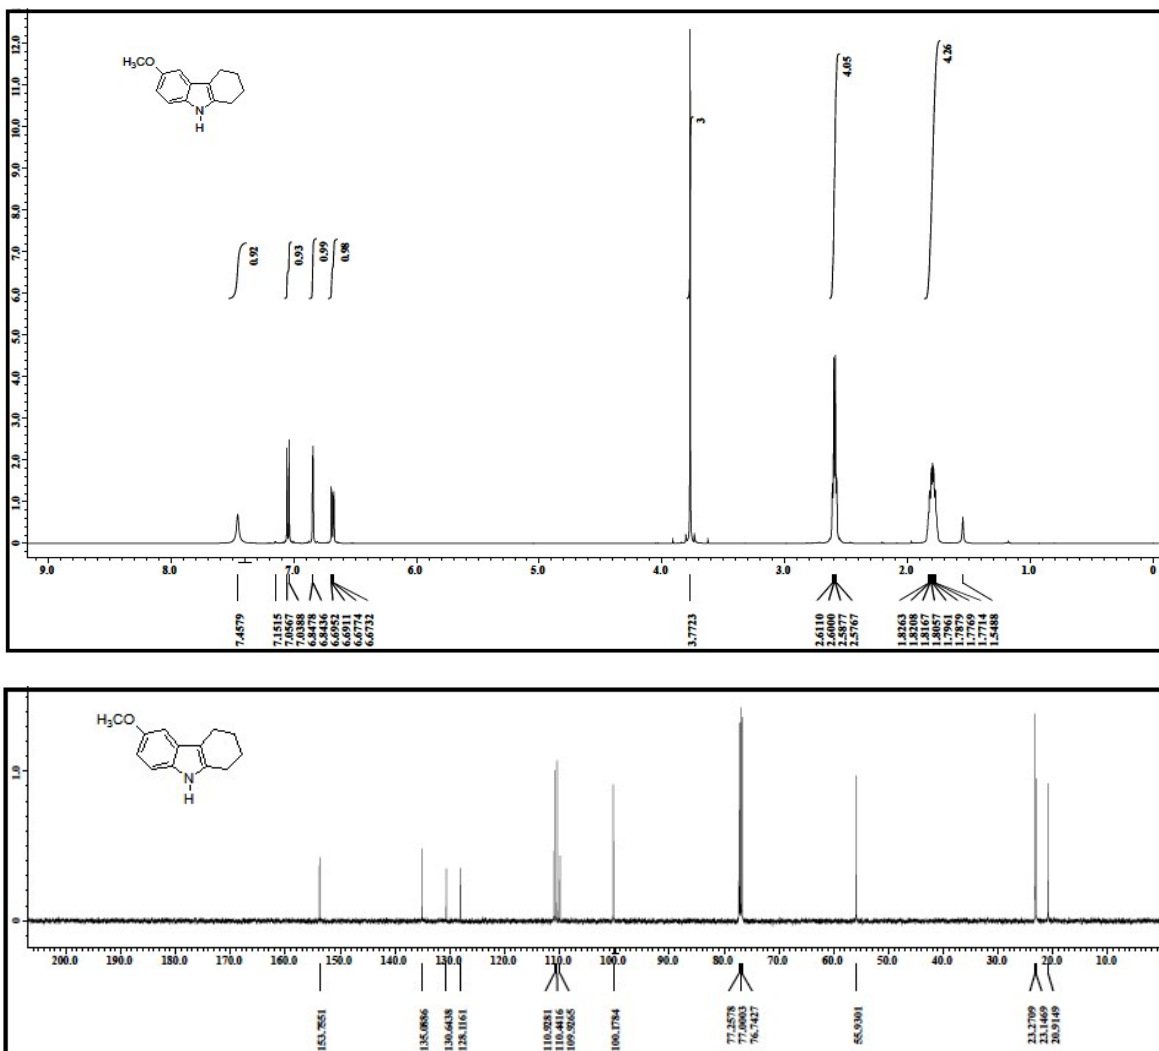

Fig. S50  $^1\text{H}$  and  $^{13}\text{C}$  spectra of 25.

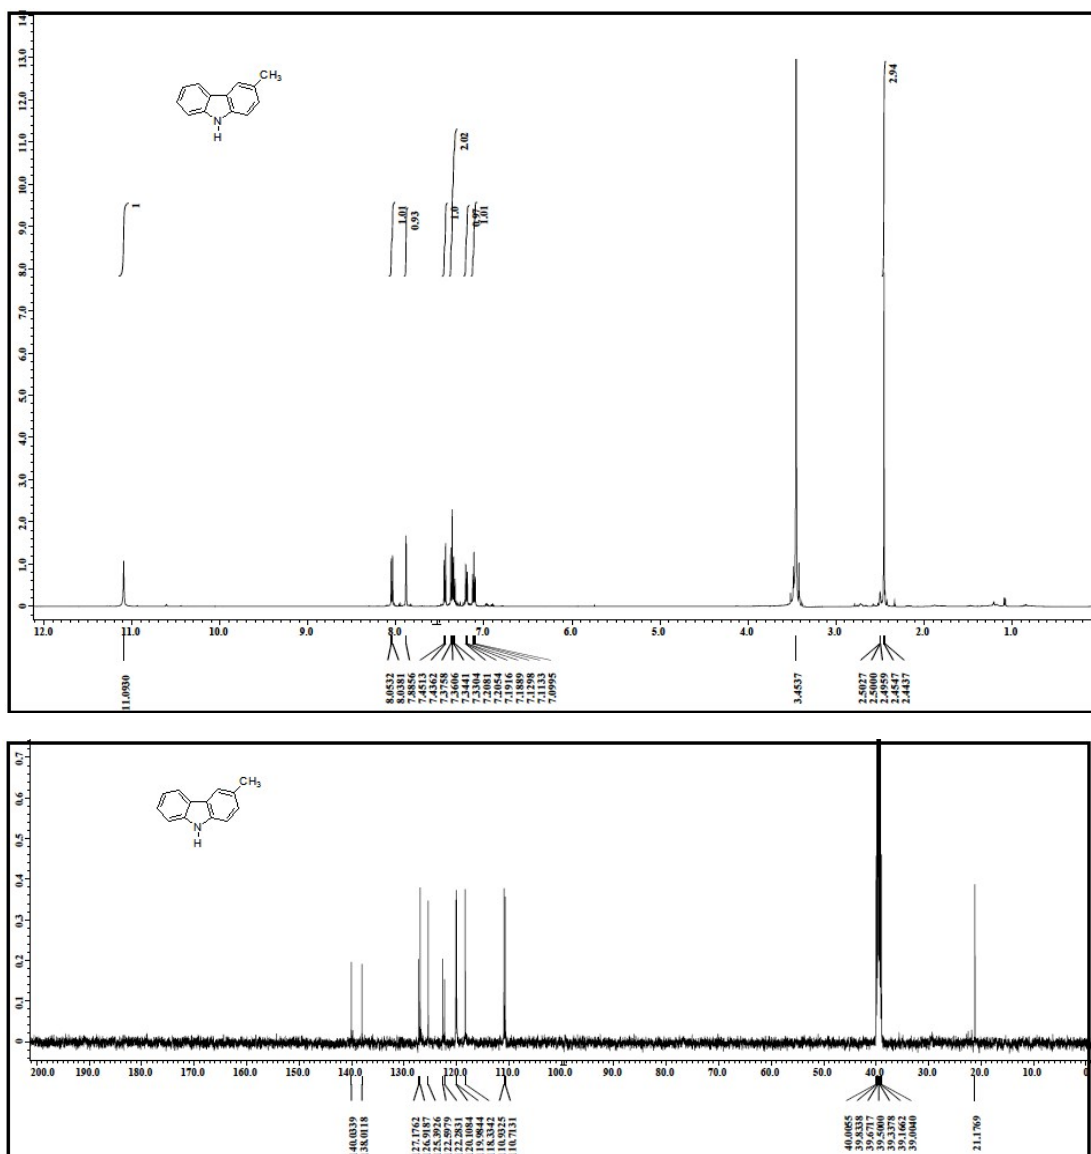

Fig. S51 <sup>1</sup>H and <sup>13</sup>C spectra of 26.

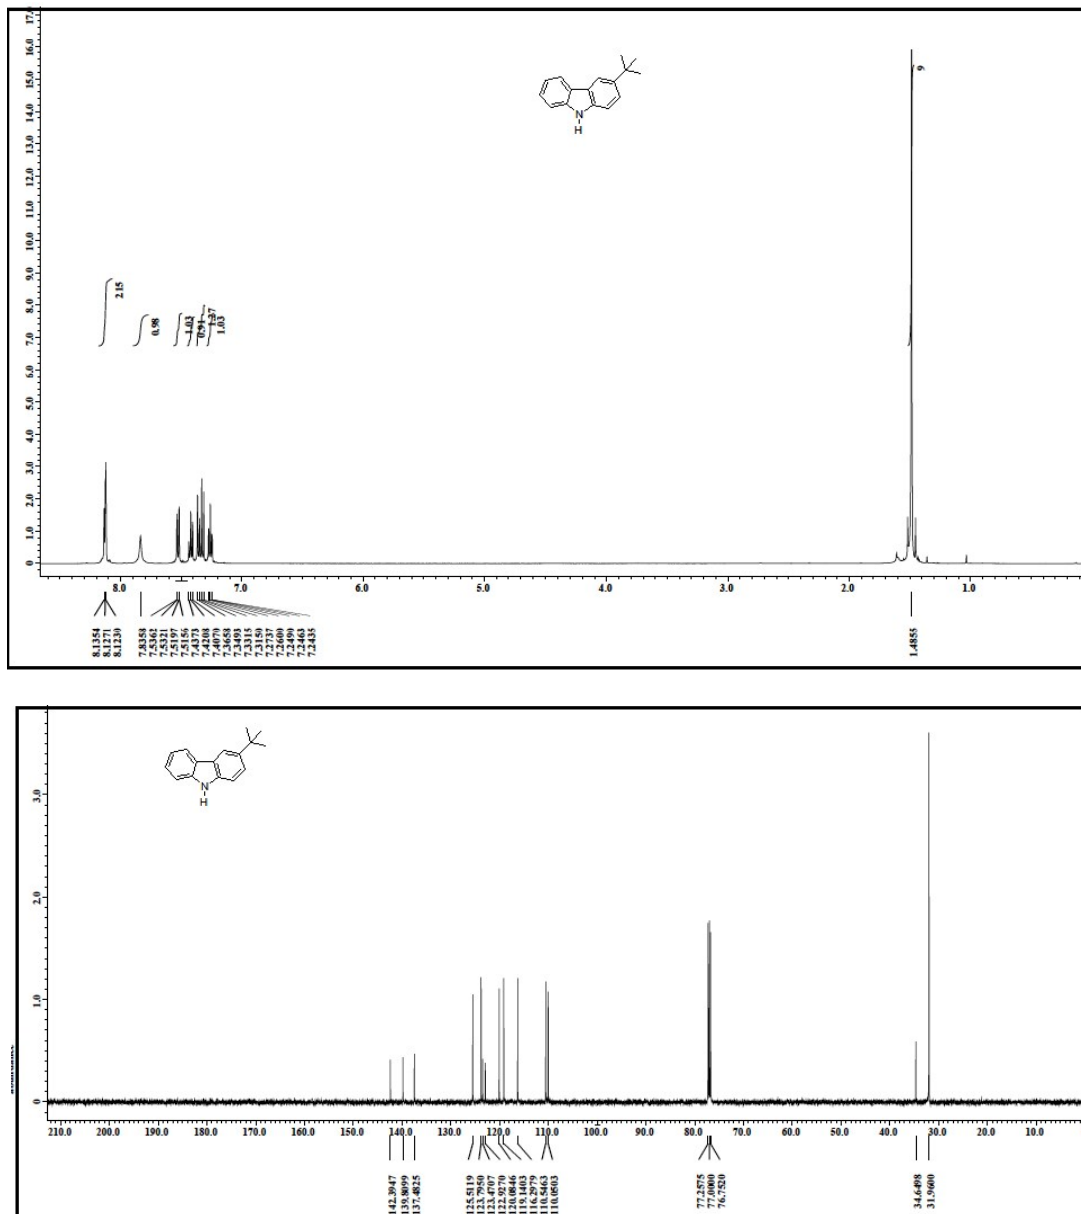

Fig. S52 <sup>1</sup>H and <sup>13</sup>C spectra of 27.

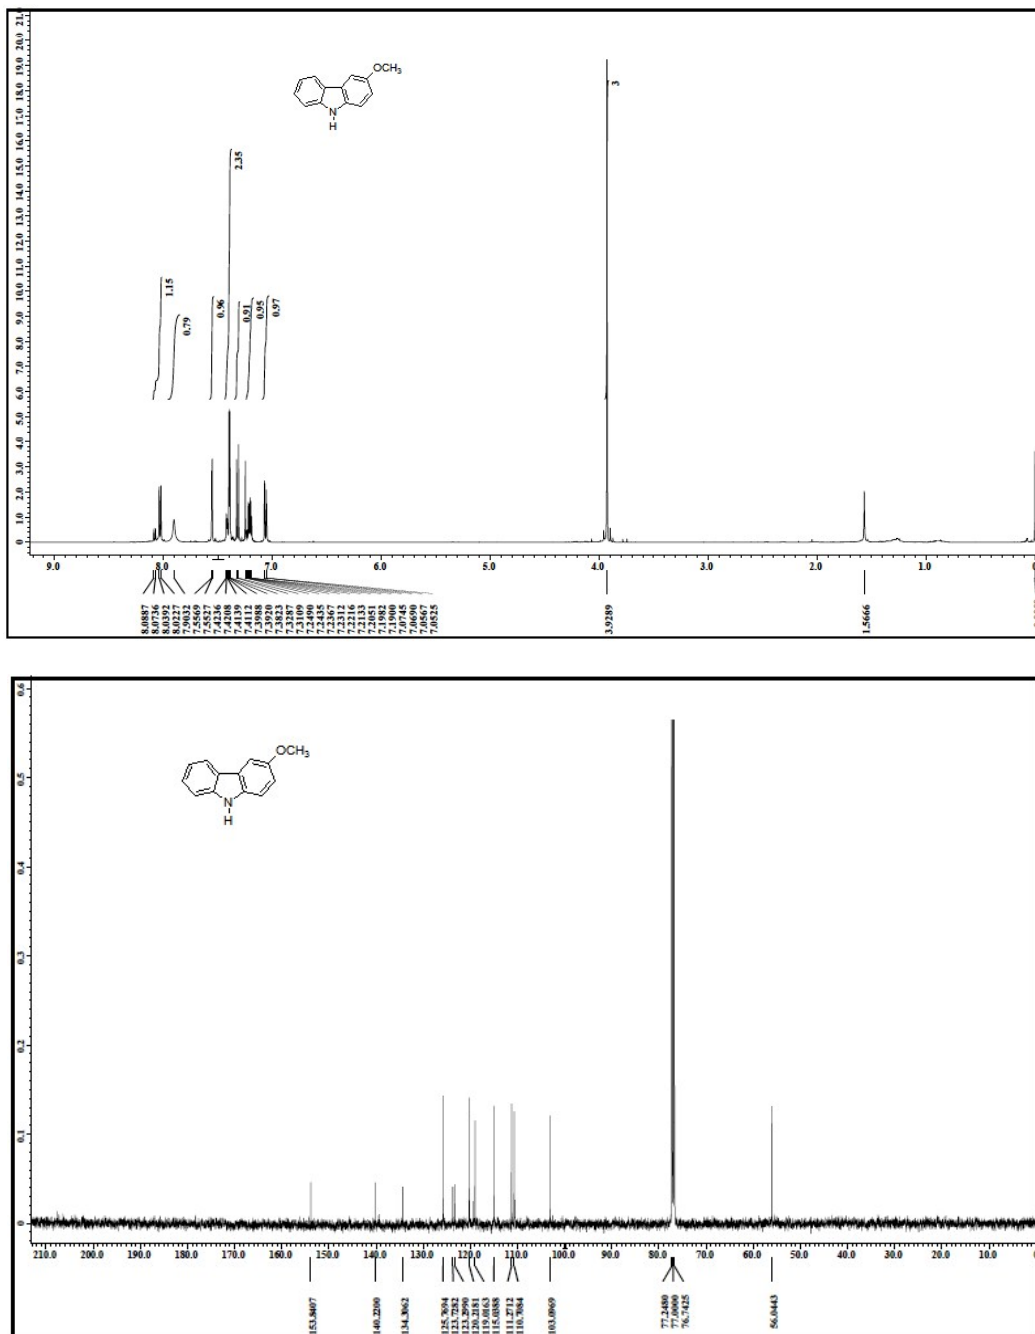

Fig. S53 <sup>1</sup>H and <sup>13</sup>C spectra of 28.

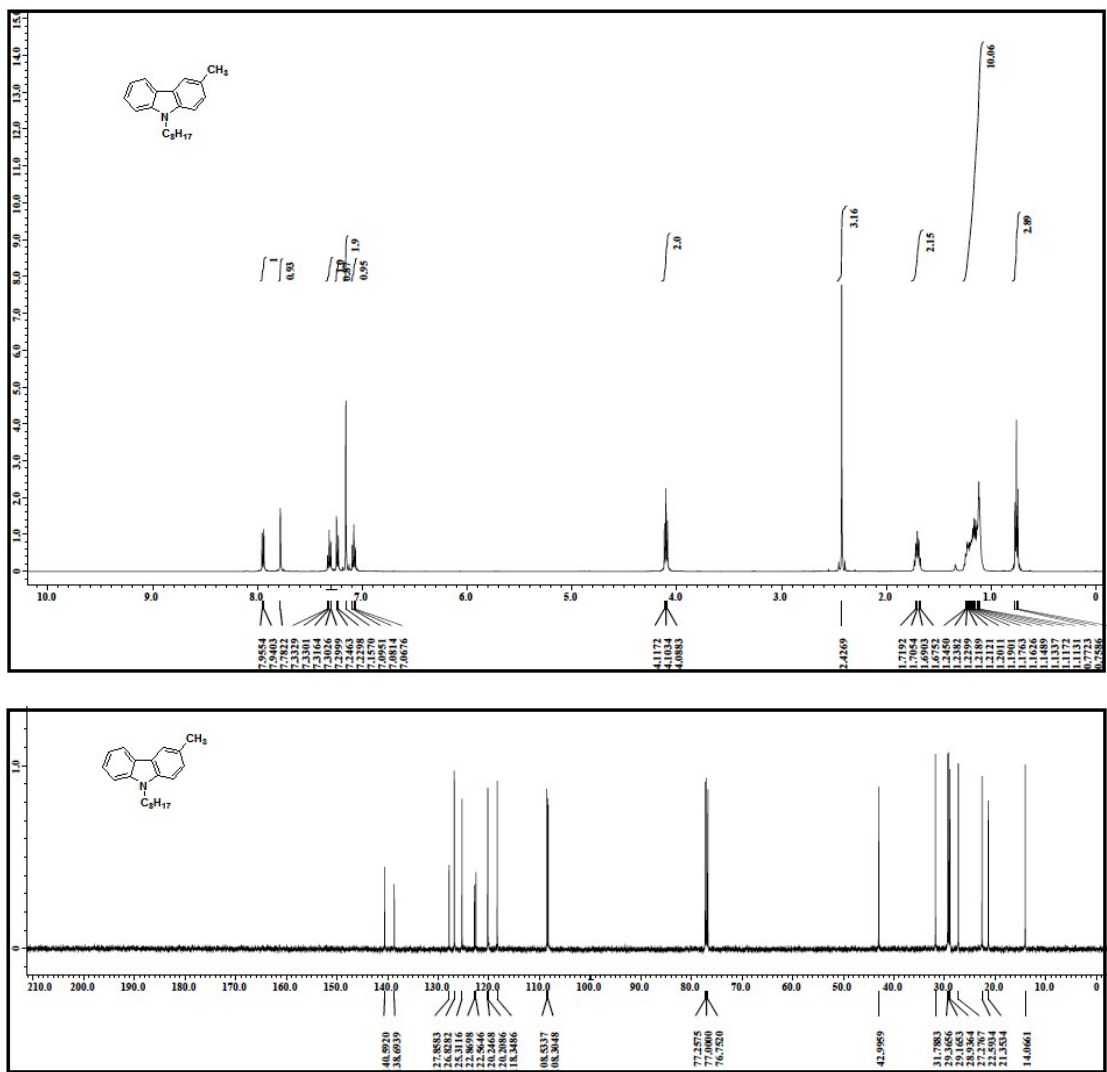

Fig. S54 <sup>1</sup>H and <sup>13</sup>C spectra of L30.

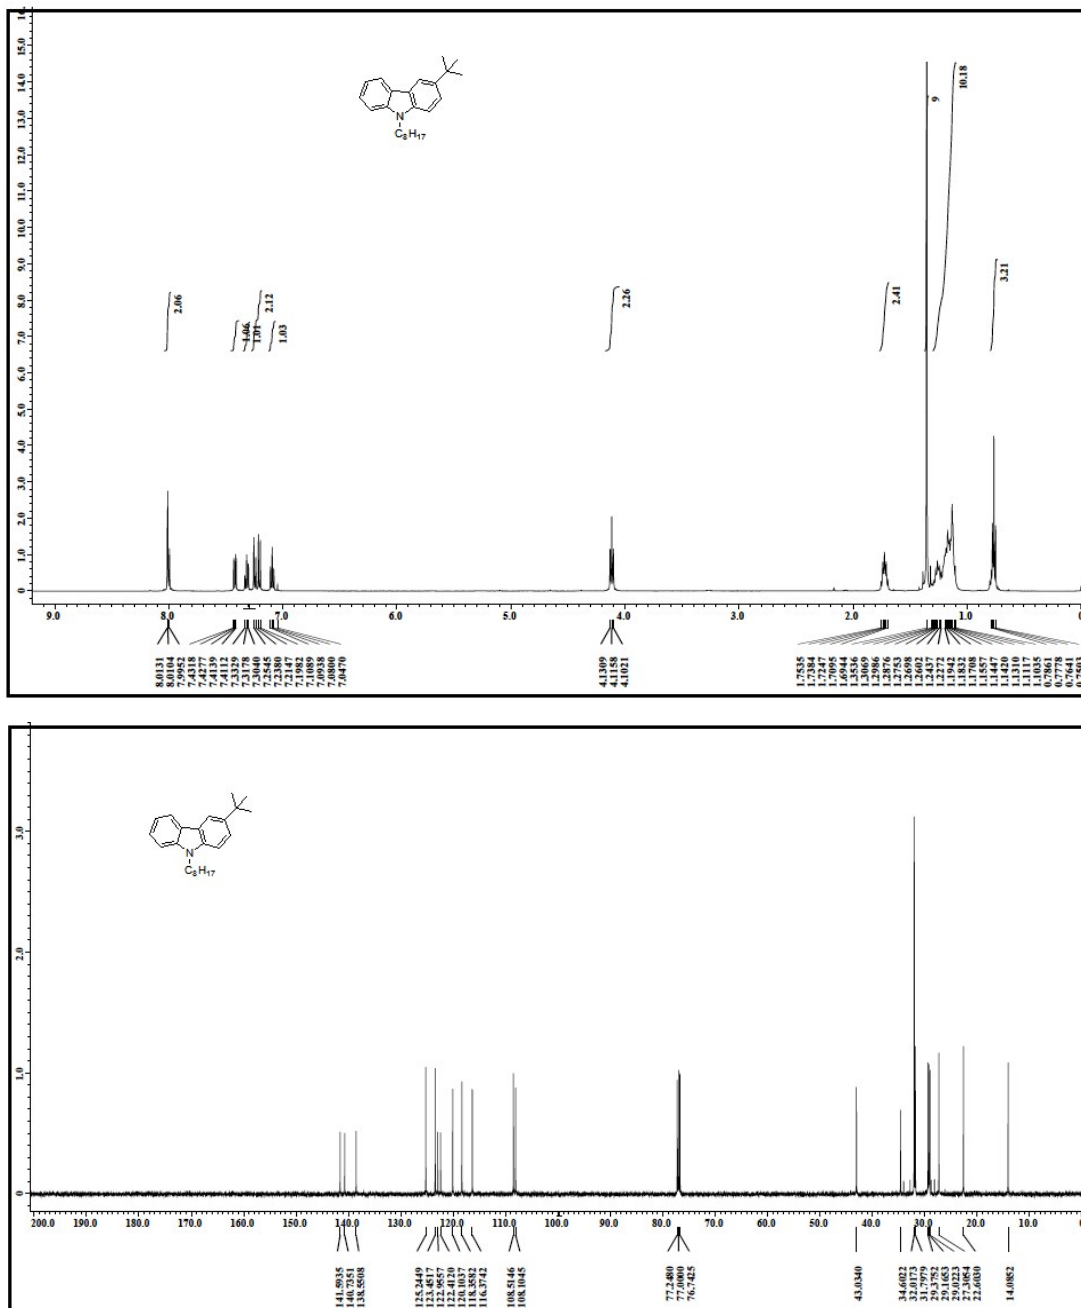

Fig. S55  $^1H$  and  $^{13}C$  spectra of L31.

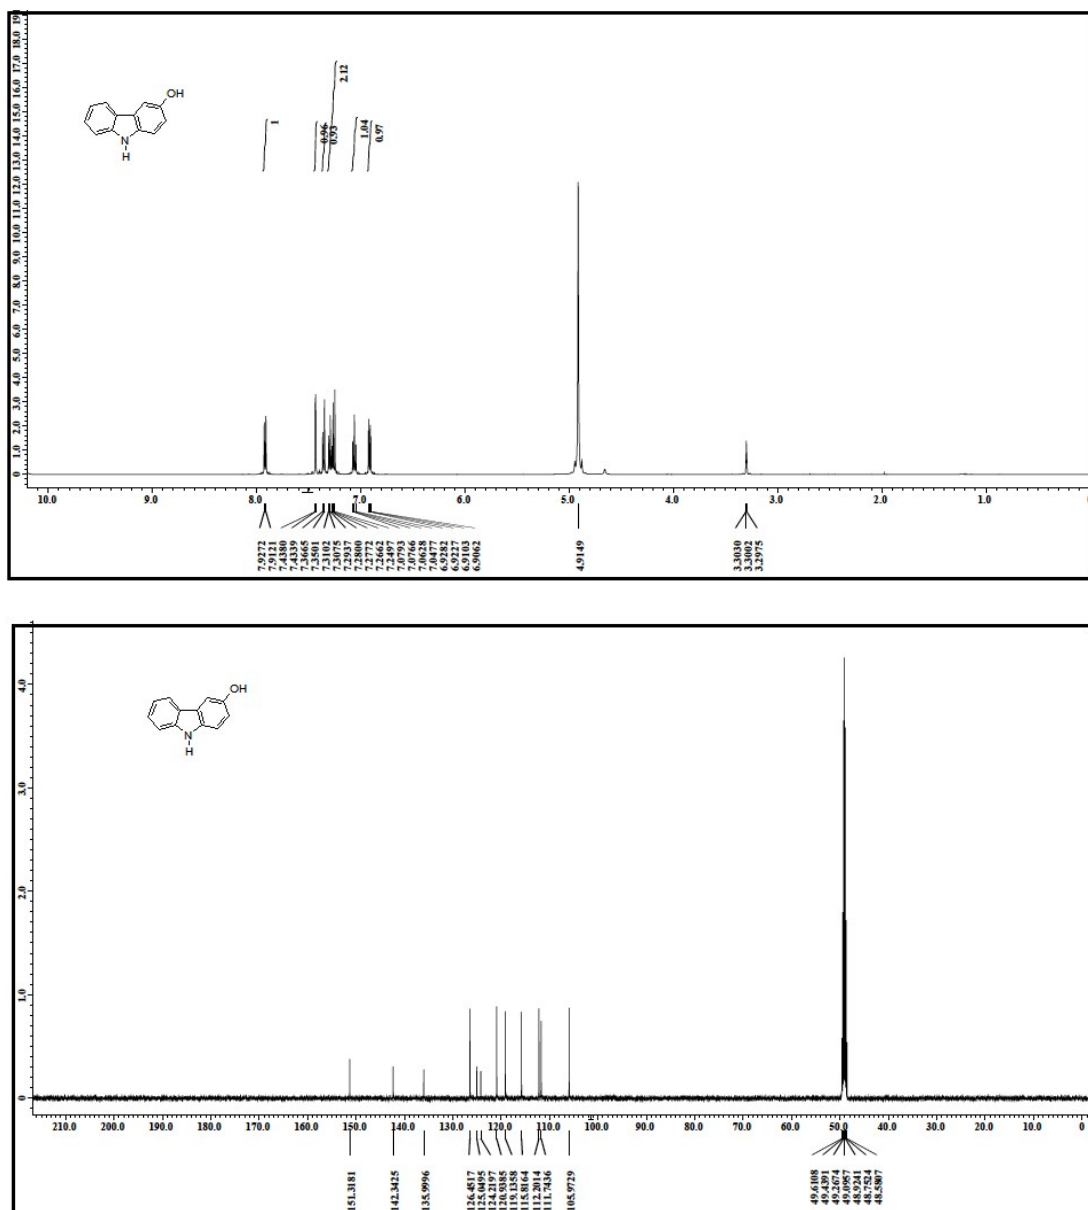

Fig. S56  $^1\text{H}$  and  $^{13}\text{C}$  spectra of L29.



## References:

1. B. Ojha and G. Das, *Chem. Commun.*, 2010, **46**, 2079.
2. D. F. Eaton, *Pure & Appl. Chem.*, 1988, **60**, 1107.
3. R. Swaminathan, G. Krishnamoorthy and N. Periasamy, *Biophys J.*, 1994, **67**, 2013.
4. P. V. Kamat, S. Das, K. G. Thomas and M. V. George, *J. Phys. Chem.*, 1992, **96**, 195.
5. A. Wolfe, G. H. Shimer and T. Meehan, *Biochemistry*, 1987, **26**, 6392.
6. S. Neelam, M. Gokara, B. Sudhamalla, D. G. Amooru and R. S. Subramanyam, *J. Phys. Chem. B*, 2010, **114**, 3005.
7. B. Ojha and G. Das, *J. Phys. Chem. B*, 2010, **114**, 3979.
8. G. Dey, A. Gupta, T. Mukherjee, P. Gaur, A. Chaudhury, S. K. Mukhopadhyay, C. K. Nandi and S. Ghosh, *ACS Appl. Mater. Interfaces* 2014, **6**, 10231.
